# Supplementary material for: Theoretical exploration of siloxy carbenes: photogeneration and [2+1] photocyclization mechanisms
Source: Royal Society of Chemistry journal article supplement (doi:10.1039/d4cp03416c), 2024-01-01
Supplement: d4cp03416c1.pdf [file d4cp03416c1.pdf]

## *Supporting Information*

# **Theoretical Exploration of Siloxy Carbenes: Photogeneration and [2+1] Photocyclization Mechanisms**

Jianhao Li,<sup>a</sup> Xiaohan Jiang,<sup>a</sup> Zixi Liang,<sup>a</sup> Chao Tang,<sup>a</sup> Lishuang Ma<sup>a,\*</sup>, Xufeng Lin,<sup>a</sup> Xinmei Liu,<sup>a</sup>

Xuebo Chen,<sup>b,c</sup>

a. College of Chemistry and Chemical Engineering, State Key Laboratory of Heavy Oil Processing, China University of Petroleum (East China), Qingdao 266580, P. R. China

b. Key Laboratory of Theoretical and Computational Photochemistry of Ministry of Education, Department of Chemistry, Beijing Normal University, Beijing 100875, P. R. China.

c. Shandong Laboratory of Yantai Advanced Materials and Green Manufacturing, Yantai 265503, P. R. China.

**\*Corresponding author:** hxmals@upc.edu.cn

## **Contents**

|                                                                      |     |
|----------------------------------------------------------------------|-----|
| 1. Selected Orbitals in Active Space.....                            | S2  |
| 2. Charge Population and Molecular Orbital Composition Analyses..... | S5  |
| 3. Rate constant Calculations.....                                   | S9  |
| 4. Geometric Parameters of Critical Structures.....                  | S11 |
| 5. References.....                                                   | S14 |
| 6. Tables for the Absolute and Relative Energies.....                | S15 |
| 7. Cartesian Coordinates.....                                        | S49 |

## 1. Selected Orbitals in Active Space

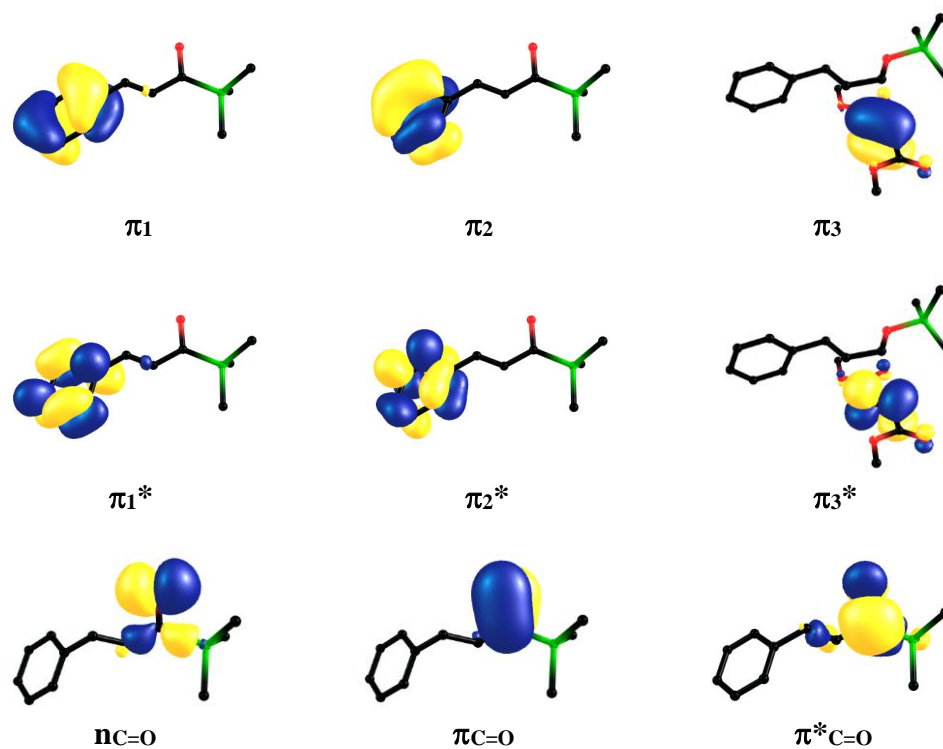

**Fig. S1** Molecular orbitals of 1 with a fumarate in defining the active spaces for the CASPT2//CASSCF(10e/9o) calculations.

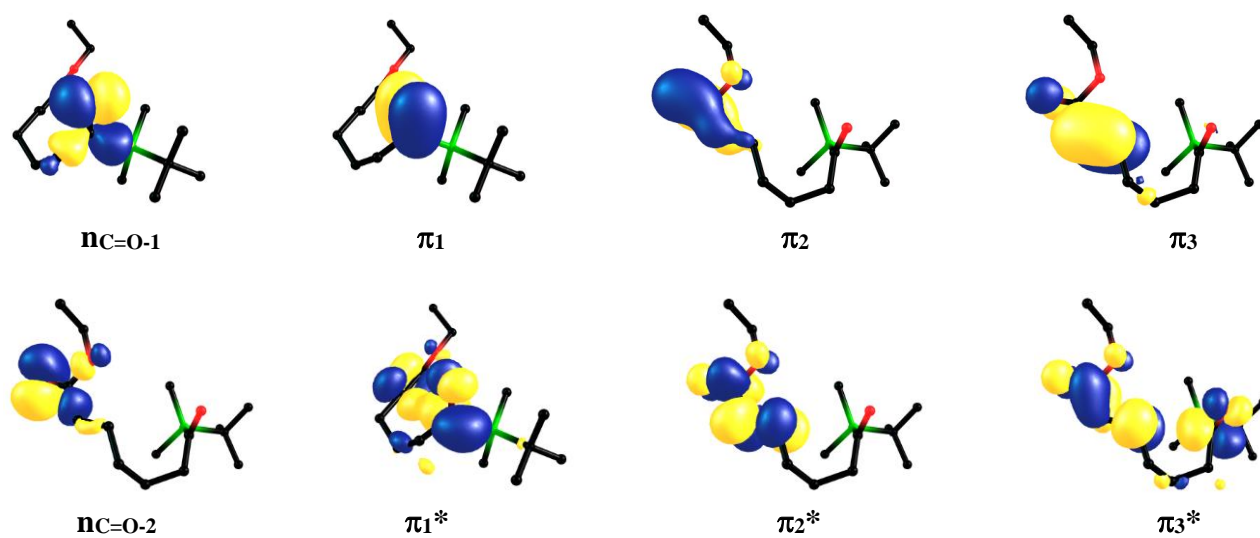

**Fig. S2** Molecular orbitals of 2 used in defining the active spaces for the CASPT2//CASSCF(10e/8o) calculations.

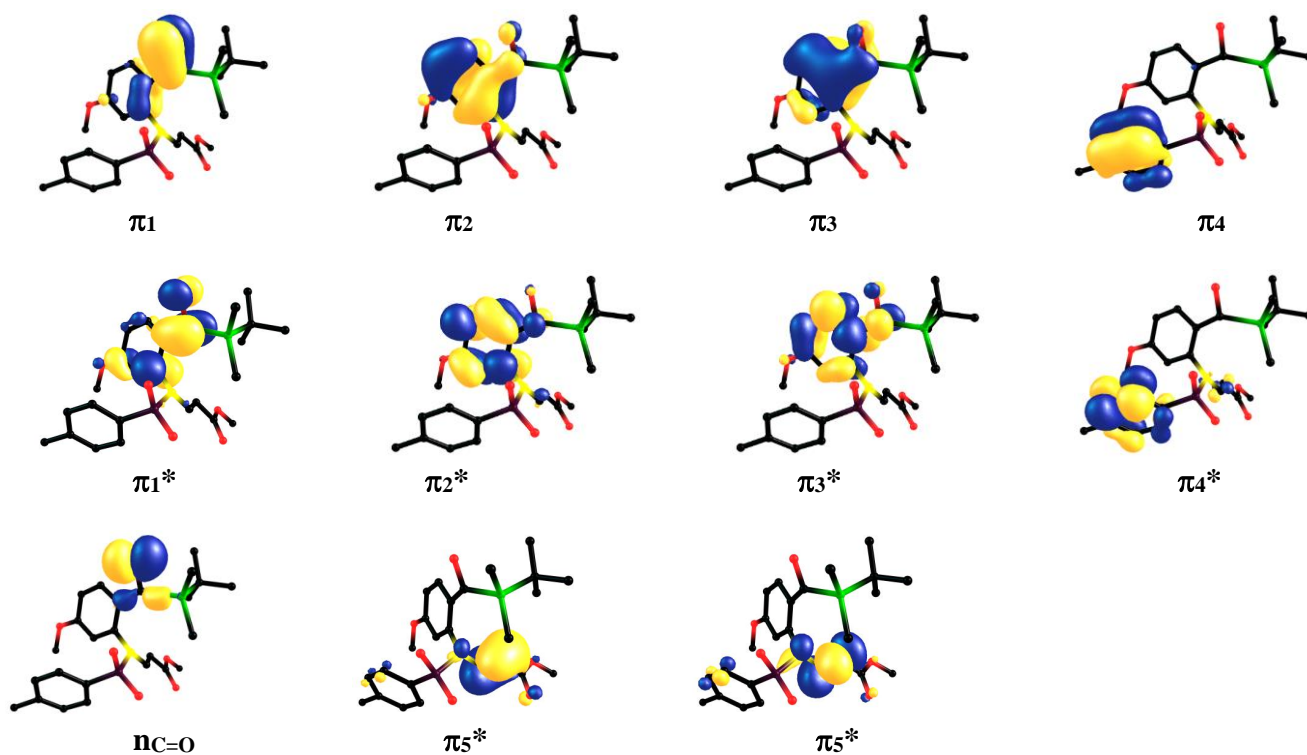

**Fig. S3** Molecular orbitals of **3** used in defining the active spaces for the CASPT2//CASSCF(12e/11o) calculations.

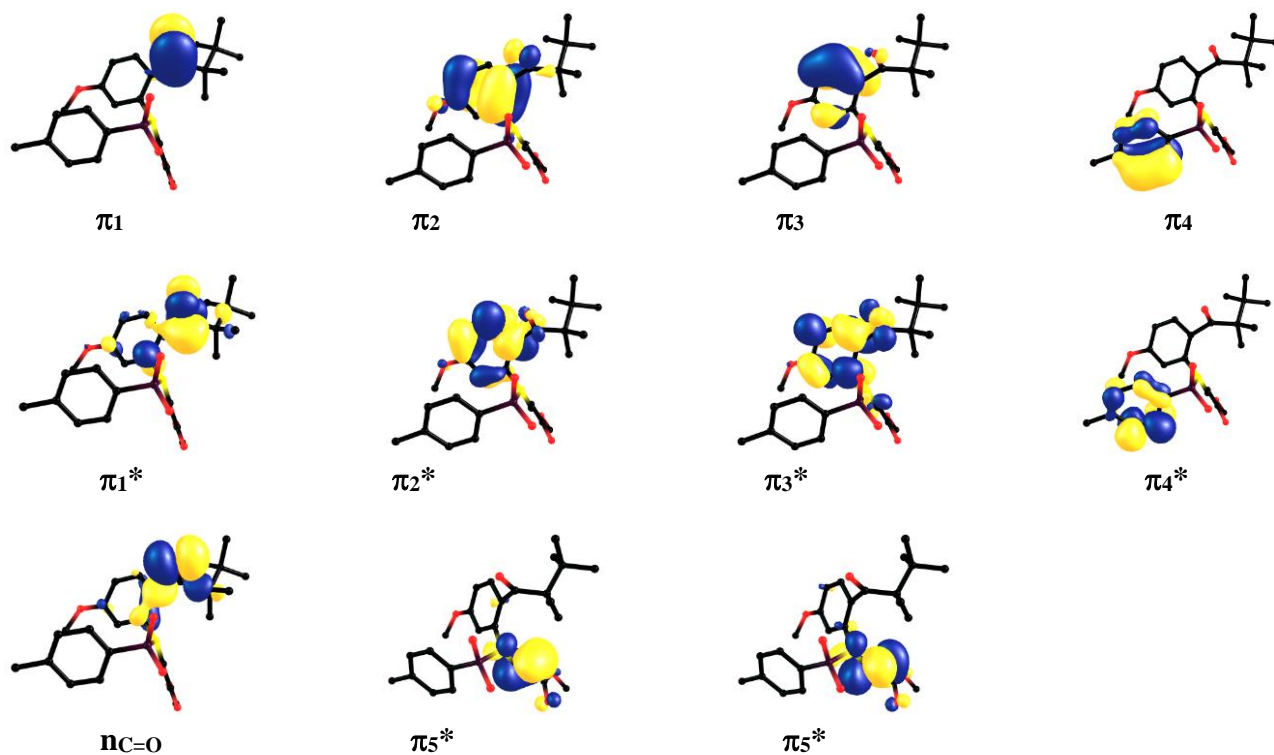

**Fig. S4** Molecular orbitals of **4** used in defining the active spaces for the CASPT2//CASSCF(12e/11o) calculations.

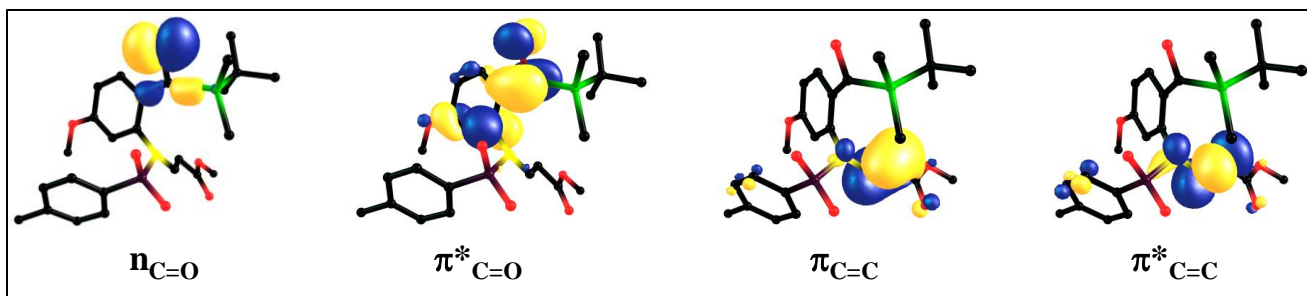

$S_{NP}(^1n\pi^*)$

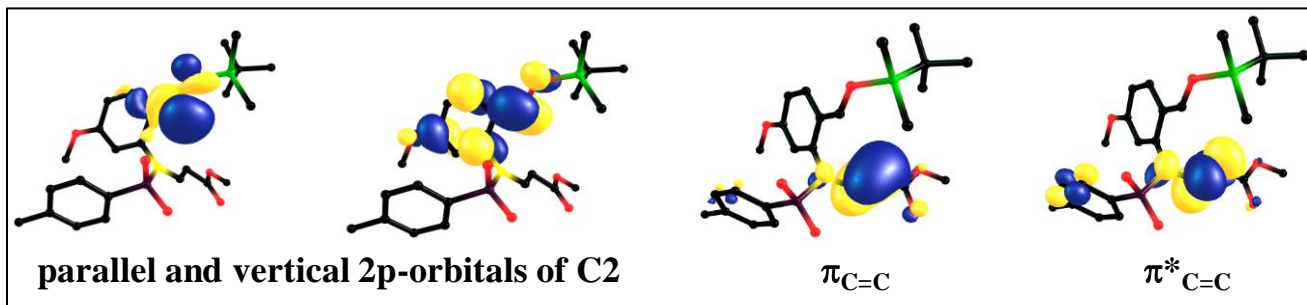

$S_{\Sigma P}(\sigma^1\pi^1)$

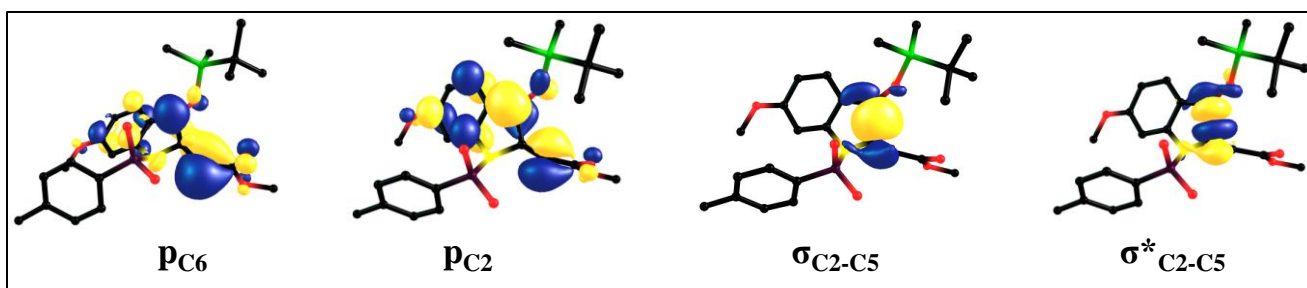

$STC(T_1/S_0)$

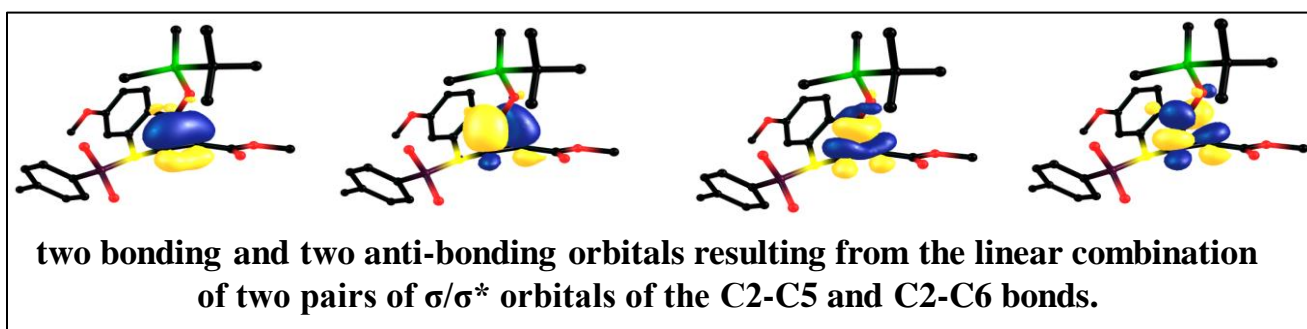

*exo-P3*

**Fig. S5** Orbital evolutions of **3** in some key electronic configurations are schematically shown along the photogeneration of for siloxy carbene and [2+1] photocyclization pathways.

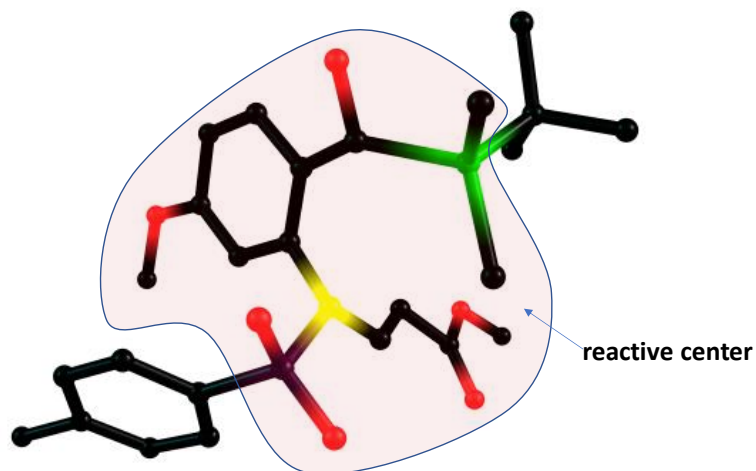

**Fig. S6** Schematic illustration of the mixed basis sets for calculations on **3** and **4**. The 6-31G(d) was used to the atoms in shadow, the STO-3G was applied to the remaining atoms.

## **2. Charge Population and Molecular Orbital Composition Analyses**

To further explore the excited-state properties of different transitions for **1-4**, charge translocation calculations were performed based on the CASPT2 computations and an appropriate fragment partitioning strategy, as summarized in Table S1. As shown in Table S2 and S3, the contributions of different fragments for n,  $\pi^*$  and  $\sigma$  orbital compositions were obtained based on the Hirshfeld orbital composition analysis carried out using the Multiwfn program.<sup>S1</sup>

**Table S1.** Charge populations ( $e$ ) of **1-4** in the ground ( $S_0$ ) and  $S_{NP}(^1n\pi^*)$  states in the Franck-Condon (FC) region.

| Species  | Fragment Partition                                                                  | Part   | $S_0$ | $S_{NP}$ |
|----------|-------------------------------------------------------------------------------------|--------|-------|----------|
| <b>1</b> | 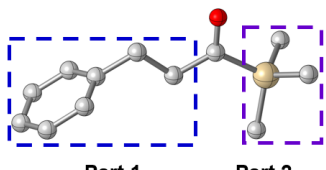   | C      | 0.14  | 0.29     |
|          |                                                                                     | O      | -0.32 | -0.51    |
|          |                                                                                     | Part 1 | 0.04  | 0.06     |
|          |                                                                                     | Part 2 | 0.15  | 0.16     |
| <b>2</b> |    | C      | 0.14  | 0.33     |
|          |                                                                                     | O      | -0.32 | -0.52    |
|          |                                                                                     | Part 1 | 0.06  | 0.06     |
|          |                                                                                     | Part 2 | 0.12  | 0.13     |
| <b>3</b> |   | C      | 0.07  | 0.36     |
|          |                                                                                     | O      | -0.30 | -0.61    |
|          |                                                                                     | Part 1 | 0.09  | 0.13     |
|          |                                                                                     | Part 2 | -0.74 | -0.76    |
| <b>4</b> |  | C      | 0.22  | 0.37     |
|          |                                                                                     | O      | -0.32 | -0.51    |
|          |                                                                                     | Part 1 | 0.06  | 0.09     |
|          |                                                                                     | Part 2 | -0.73 | -0.71    |

**Table S2.** The fragment contributions (%) to n and  $\pi^*$  orbital components in  $S_{NP}(^1n\pi^*)$  state of **1-4** in the Franck-Condon (FC) region.

| Species | Fragment Partition                                                                  | Part | n     | $\pi^*$ |
|---------|-------------------------------------------------------------------------------------|------|-------|---------|
| 1       | 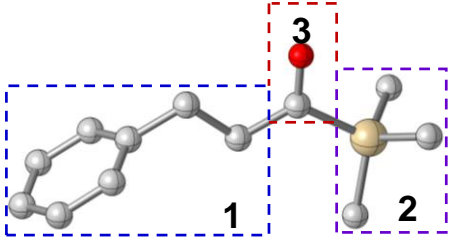   | 1    | 7.62  | 10.31   |
|         |                                                                                     | 2    | 10.53 | 10.31   |
|         |                                                                                     | 3    | 81.85 | 78.49   |
| 2       |    | 1    | 7.45  | 43.44   |
|         |                                                                                     | 2    | 8.07  | 7.23    |
|         |                                                                                     | 3    | 84.48 | 49.33   |
| 3       |   | 1    | 8.05  | 39.13   |
|         |                                                                                     | 2    | 7.74  | 5.77    |
|         |                                                                                     | 3    | 84.10 | 51.26   |
|         |                                                                                     | 4    | 0.08  | 2.36    |
|         |                                                                                     | 5    | 0.04  | 1.48    |
| 4       |  | 1    | 16.18 | 35.69   |
|         |                                                                                     | 2    | 9.32  | 7.00    |
|         |                                                                                     | 3    | 72.64 | 52.79   |
|         |                                                                                     | 4    | 1.07  | 1.57    |
|         |                                                                                     | 5    | 1.15  | 4.10    |



**Table S3.** The fragment contributions (%) to  $\sigma$  and  $\pi^*$  orbital components in  $S_0(\sigma^2\pi^0)$  and  $T_{\Sigma P}(\sigma^1\pi^1)$  carbenes of **1** and **3**.

| Species                           | Fragment Partition | Part | $\sigma$ | $\pi^*$ |
|-----------------------------------|--------------------|------|----------|---------|
| <b>1</b><br>$^1A_1-\sigma^2\pi^0$ |                    | C    | 65.99    | 67.61   |
|                                   |                    | 1    | 17.20    | 17.60   |
|                                   |                    | 2    | 16.82    | 14.80   |
| <b>1</b><br>$^3B_1-\sigma^1\pi^1$ |                    | C    | 73.97    | 70.47   |
|                                   |                    | 1    | 13.53    | 14.69   |
|                                   |                    | 2    | 12.50    | 14.84   |
| <b>3</b><br>$^1A_1-\sigma^2\pi^0$ |                    | C    | 69.60    | 29.19   |
|                                   |                    | 1    | 12.47    | 62.57   |
|                                   |                    | 2    | 16.30    | 6.07    |
|                                   |                    | 3    | 0.32     | 0.71    |
|                                   |                    | 4    | 1.32     | 1.46    |
| <b>3</b><br>$^3B_1-\sigma^1\pi^1$ |                    | C    | 71.47    | 37.43   |
|                                   |                    | 1    | 11.75    | 48.49   |
|                                   |                    | 2    | 14.80    | 9.53    |
|                                   |                    | 3    | 0.43     | 1.45    |
|                                   |                    | 4    | 1.55     | 3.11    |

### 3. Rate Constant Calculations

#### 3.1 Intersystem Crossing Rate Constant Calculations

The intersystem crossing (ISC) rates between singlet and triplet states in this work were estimated in the Condon approximation as<sup>S2</sup>

$$k_{\text{ISC}} = \frac{2\pi}{h} \cdot \left| \langle {}^1\psi_0 | \hat{H}_{\text{SO}} | {}^3\psi_0 \rangle \right|^2 \cdot |\langle \chi_0 | \chi_n \rangle|^2 \cdot \rho \quad (\text{eq. 1})$$

where the electronic coupling between the singlet state  ${}^1\psi_0$  and the triplet state  ${}^3\psi_0$  can be calculated as the SOC, the Franck–Condon factor of  $\langle \chi_0 | \chi_n \rangle$  is taken equal to 1 at the STC point, and  $\rho = 1/\Delta E_{\text{S/T}}$  is the reciprocal of the energy difference between the singlet and triplet states.

**Table S4.** The computed spin–orbit coupling values (SOC,  $\text{cm}^{-1}$ ) and the singlet–triplet energy gaps ( $\Delta E_{\text{S/T}}$ , kcal/mol) of the involved singlet–triplet crossings (STCs) between singlet and triplet states. The rate of intersystem crossing ( $k_{\text{ISC}}$ ,  $\text{s}^{-1}$ ) is estimated in the Condon approximation.

| species  | Critical points                                    | $\Delta E_{\text{S/T}}$ | SOC   | $k_{\text{ISC}}$     |
|----------|----------------------------------------------------|-------------------------|-------|----------------------|
| <b>1</b> | STC( $\text{S}_{\text{NP}}/\text{T}_{\text{NP}}$ ) | 7.4                     | 1.07  | $5.2 \times 10^8$    |
| <b>1</b> | STC( $\text{T}_{\Sigma\text{P}}/\text{S}_0$ )      | 1.7                     | 12.93 | $3.3 \times 10^{11}$ |
| <b>3</b> | STC( $\text{S}_{\text{NP}}/\text{T}_{\text{NP}}$ ) | 5.7                     | 2.14  | $2.7 \times 10^9$    |

#### 3.2 Rate Constant Calculations with the transition state theory

The rates via an energy barrier in an adiabatic potential energy surface can be estimated using the transition state theory (TST) as follows<sup>S3,S4</sup>

$$k_{\text{TST}} = \frac{k_{\text{B}}T}{h} \cdot \exp\left(-\frac{\Delta G^\ddagger}{k_{\text{B}}T}\right) \quad (\text{eq. 2})$$

where  $k_{\text{TST}}$  is the rate constant,  $\Delta G^\ddagger$  is the Gibbs free energy barrier,  $k_{\text{B}}$  is the Boltzmann constant ( $8.62 \times 10^{-5}$  eV/K),  $h$  is the Planck constant ( $6.626 \times 10^{-34}$  Js) and T is the absolute temperature (298 K).  $\Delta G^\ddagger$  is

obtained by consideration the Gibbs correction through frequency analyses for potential energy barrier ( $\Delta E^\ddagger$ ). Firstly, the minima and transition states are reoptimized at the TD-B3LYP-D3/PCM level, followed by frequency analyses to obtain the Gibbs free energy corrections, because the frequency analysis at the CASSCF level is extremely expensive, if not impossible. Secondly, if the geometries optimized at the DFT level are similar to the CASSCF results, the correction terms would be added to the potential energy barriers at the CASPT2//CASSCF level. Finally, the TST rate can be calculated using  $\Delta G^\ddagger$ .

**Table S4.** The computed thermal correction to Gibbs free energy ( $G_{\text{Corr.}}$ , Hartree) for the  $S_{\text{NP}}$ -Min and  $S_{\text{NP}}$ -TS of **3**, as well as the Gibbs free energy barrier ( $\Delta G^\ddagger$ , kcal/mol) of the 1,2-silyl transfer process in  $S_{\text{NP}}(^1n\pi^*)$  state.

| species  | $G_{\text{Corr.}}$ of $S_{\text{NP}}$ -Min | $G_{\text{Corr.}}$ of $S_{\text{NP}}$ -TS | $\Delta G^\ddagger$ | $k_{\text{TST}}$     |
|----------|--------------------------------------------|-------------------------------------------|---------------------|----------------------|
| <b>3</b> | 0.495754                                   | 0.494125                                  | 3.0                 | $3.9 \times 10^{10}$ |



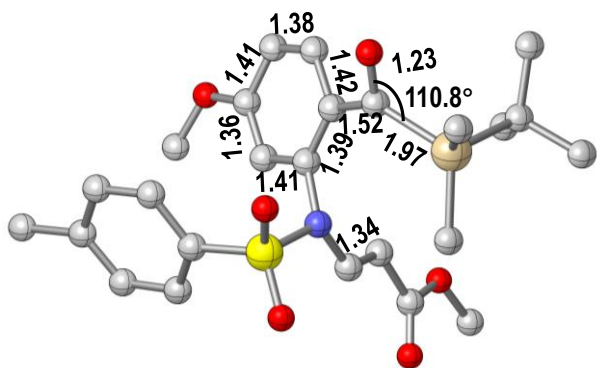

S<sub>0</sub>-Min

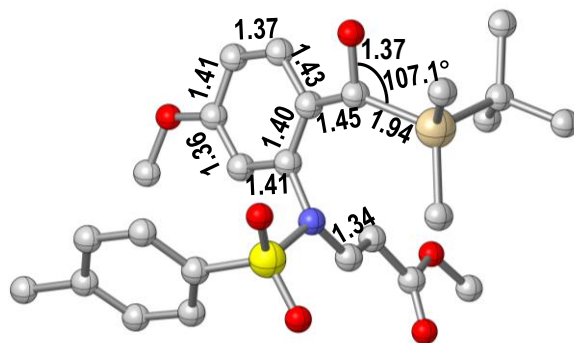

S<sub>NP</sub>-Min/STC(S<sub>NP</sub>/T<sub>NP</sub>)

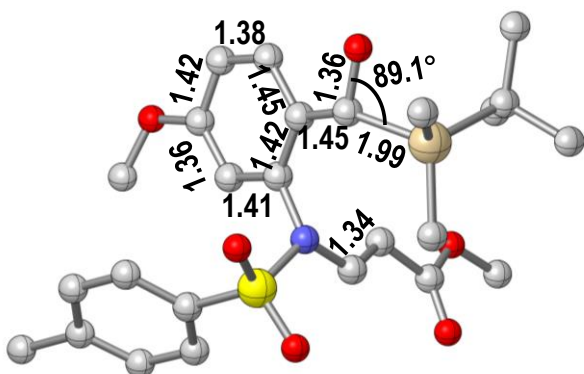

S<sub>NP</sub>-TS

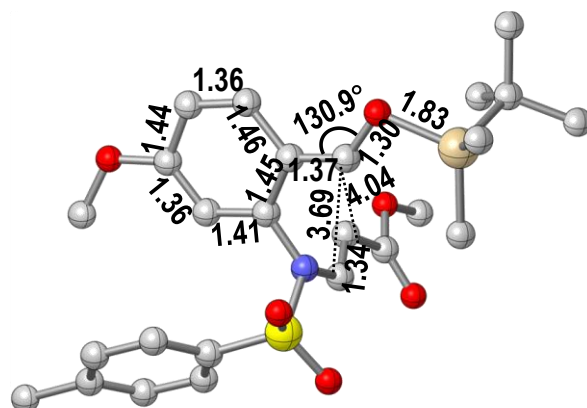

CI(S<sub>ΣP</sub>/S<sub>0</sub>)

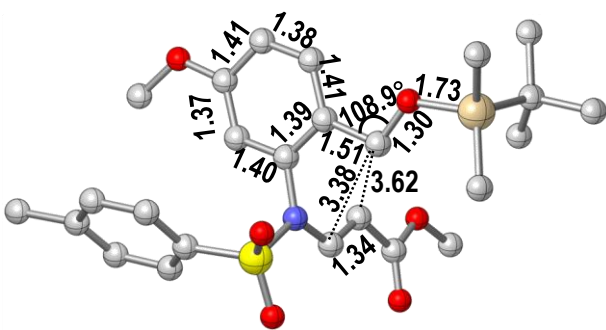

S<sub>0</sub>(σ<sup>2</sup>π<sup>0</sup>)-Min

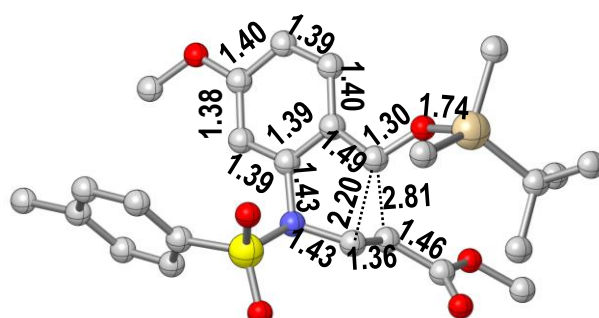

S<sub>0</sub>-TS

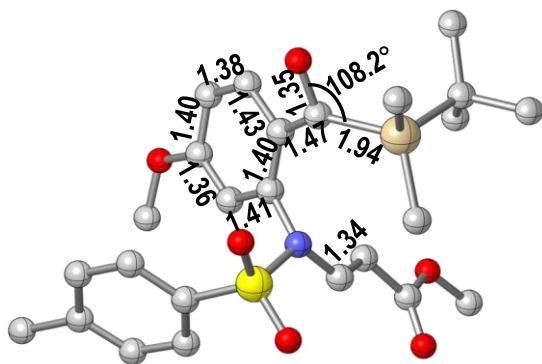

T<sub>NP</sub>-Min

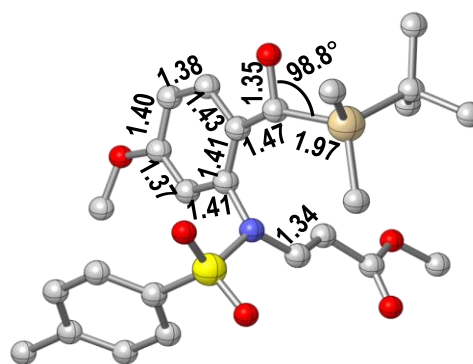

T<sub>NP</sub>-TS

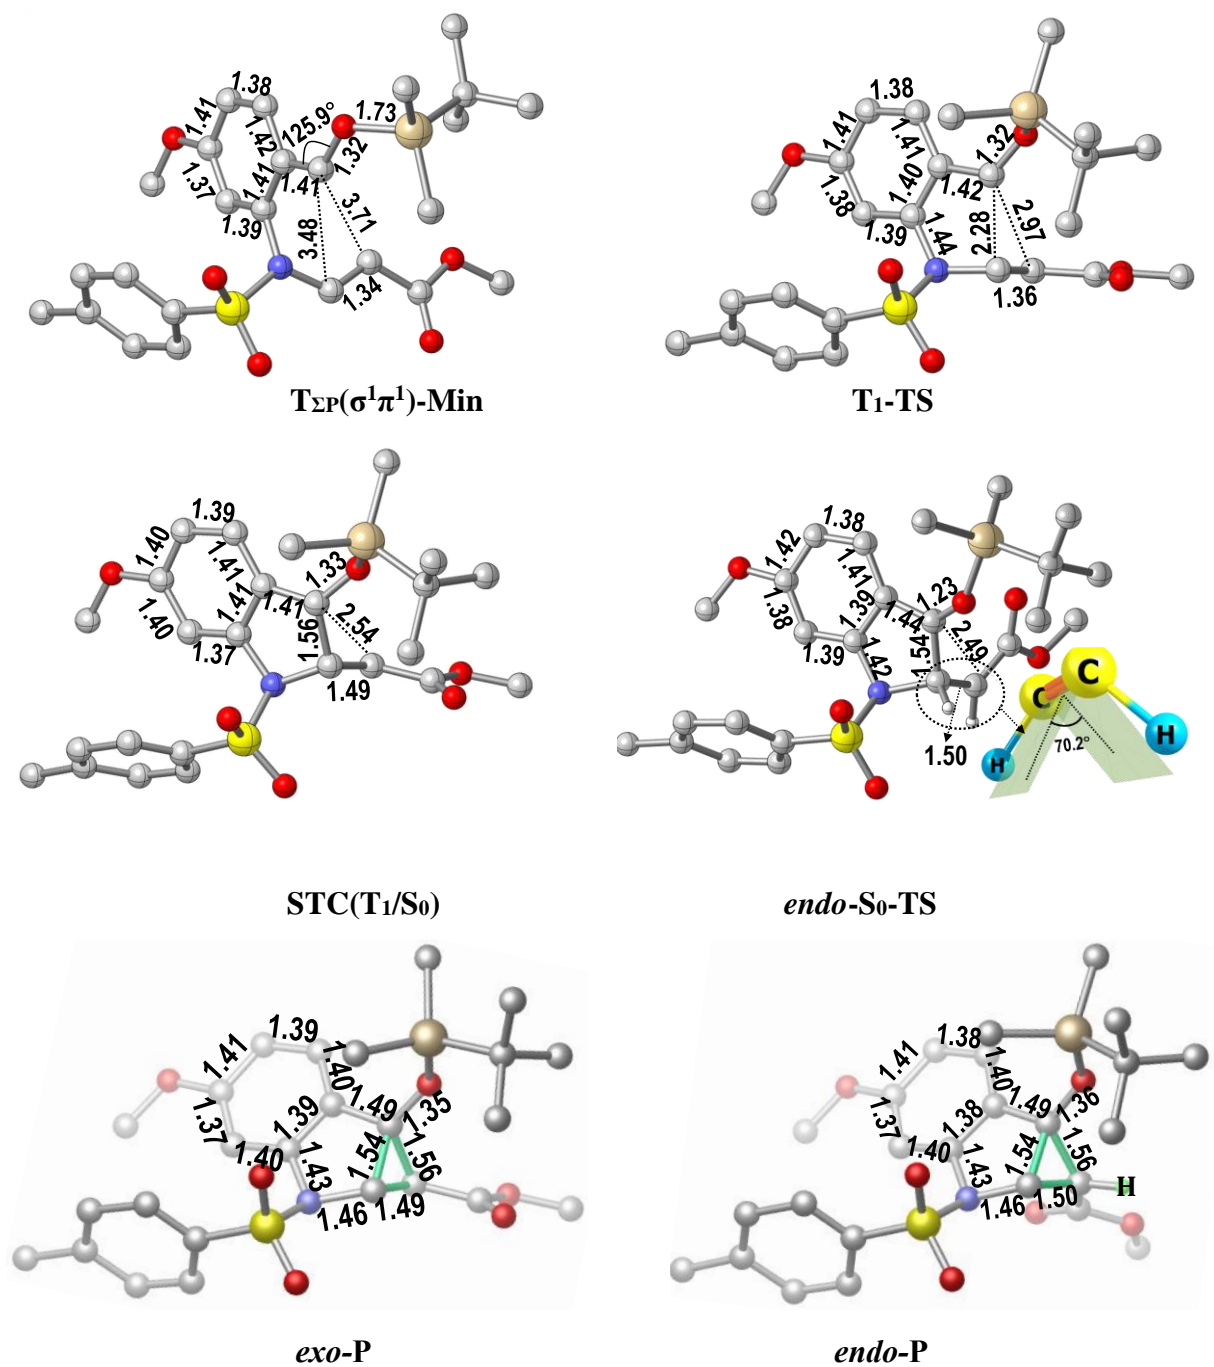

**Fig. S8.** The critical structures for **3** along the photogeneration of carbene and [2+1] cycloaddition reaction pathways in Fig. 3. Selected key bond distances are given in Å and angles are given in degree.

## **5. References**

- (1) T. Lu, and F. Chen, Multiwfn: A multifunctional wavefunction analyzer. *J. Comput. Chem.*, 2012, **33**, 580–592.
- (2) C. M. Marian, Spin–orbit coupling and intersystem crossing in molecules. *WIREs Comput. Mol. Sci.*, 2012, **2**, 187–203.
- (3) S. Ruccolo, Y. Qin, C. Schnedermann, D. G. Nocera, General strategy for improving the quantum efficiency of photoredox hydroamidation catalysis, *J. Am. Chem. Soc.*, 2018, **140**, 14926–14937.
- (4) D. G. Truhlar, W. L. Hase and J. T. Hynes, Current status of transition-state theory, *J. Phys. Chem.* 1983, **87**, 2664–2682.

## 6. Tables for the Absolute and Relative Energies

**Table S6.** Absolute energies (A.E., Hartree) and relative energies (R.E., kcal/mol) for the ground-state minima of **1-4** upon irradiation at the Franck Condon region obtained by CASPT2//CASSCF/PCM calculations.

| Species  | States                                     | CASSCF      | RASSCF      | CASPT2      |       |
|----------|--------------------------------------------|-------------|-------------|-------------|-------|
|          |                                            | A.E.        | A.E.        | A.E.        | R.E.  |
| <b>1</b> | Root1[S <sub>0</sub> ]                     | -828.75867  | -828.77721  | -830.48507  | 0.0   |
|          | Root2[S <sub>NP</sub> ( <sup>1</sup> nπ*)] |             | -828.63471  | -830.35755  | 80.0  |
|          | Root3                                      |             | -828.54403  | -830.29419  |       |
|          | Root4                                      |             | -828.48922  | -830.22898  |       |
| <b>2</b> | Root1[S <sub>0</sub> ]                     | -1898.98428 | -1097.92068 | -1100.37611 | 0.0   |
|          | Root2[S <sub>NP</sub> ( <sup>1</sup> nπ*)] |             | -1097.78774 | -1100.25698 | 74.8  |
|          | Root3                                      |             | -1097.72008 | -1100.18945 |       |
|          | Root4                                      |             | -1097.65575 | -1100.13089 |       |
| <b>3</b> | Root1[S <sub>0</sub> ]                     | -2149.92701 | -2150.05847 | -2153.61137 | 0.0   |
|          | Root2[S <sub>NP</sub> ( <sup>1</sup> nπ*)] |             | -2149.92975 | -2153.50001 | 69.9  |
|          | Root3[S <sub>PP</sub> ( <sup>1</sup> ππ*)] |             | -2149.83928 | -2153.45876 | 95.8  |
|          | Root4                                      |             | -2149.81428 | -2153.42890 |       |
|          | Root5                                      |             | -2149.77968 | -2153.40464 |       |
| <b>4</b> | Root1[S <sub>0</sub> ]                     | -1097.93863 | -1898.97416 | -1902.58464 | 0.0   |
|          | Root2[S <sub>NP</sub> ( <sup>1</sup> nπ*)] |             | -1898.81048 | -1902.43397 | 94.5  |
|          | Root3[S <sub>PP</sub> ( <sup>1</sup> ππ*)] |             | -1898.75056 | -1902.41957 | 103.6 |
|          | Root4                                      |             | -1898.69086 | -1902.37632 |       |
|          | Root5                                      |             | -1898.67482 | -1902.39195 |       |

**Table S7.** Absolute energies (A.E., Hartree) and relative energies (R.E., kcal/mol) for the optimized structures of **1** along the pathways for photogeneration of siloxy carbene and intermolecular [2+1] cycloaddition with a fumarate obtained by CASPT2//CASSCF/PCM calculations. The corresponding energy profile is plotted in Fig. 1.

| <b>1</b> | CASSCF | RASSCF | CASPT2 |      |
|----------|--------|--------|--------|------|
|          | A.E.   | A.E.   | A.E.   | R.E. |
|          |        |        |        |      |



|                                 |                                            |            |            |            |      |
|---------------------------------|--------------------------------------------|------------|------------|------------|------|
| <b>S<sub>0</sub>-Min</b>        | Root1[S <sub>0</sub> ]                     | -828.75867 | -828.77721 | -830.48507 | 0.0  |
|                                 | Root2[S <sub>NP</sub> ( <sup>1</sup> nπ*)] |            | -828.63471 | -830.35755 | 80.0 |
|                                 | Root3                                      |            | -828.54403 | -830.29419 |      |
|                                 | Root4                                      |            | -828.48922 | -830.22898 |      |
| <b>SNP-1</b>                    | Root1[S <sub>0</sub> ]                     |            | -828.77563 |            |      |
|                                 | Root2[S <sub>NP</sub> ( <sup>1</sup> nπ*)] | -828.61538 | -828.63751 | -830.36235 | 77.0 |
|                                 | Root3                                      |            | -828.54730 |            |      |
|                                 | Root4                                      |            | -828.49375 |            |      |
| <b>SNP-2</b>                    | Root1[S <sub>0</sub> ]                     |            | -828.77352 |            |      |
|                                 | Root2[S <sub>NP</sub> ( <sup>1</sup> nπ*)] | -828.62476 | -828.64692 | -830.36559 | 75.0 |
|                                 | Root3                                      |            | -828.54516 |            |      |
|                                 | Root4                                      |            | -828.50111 |            |      |
| <b>SNP-3</b>                    | Root1[S <sub>0</sub> ]                     |            | -828.76011 |            |      |
|                                 | Root2[S <sub>NP</sub> ( <sup>1</sup> nπ*)] | -828.63389 | -828.65560 | -830.36691 | 74.2 |
|                                 | Root3                                      |            | -828.53089 |            |      |
|                                 | Root4                                      |            | -828.50597 |            |      |
| <b>SNP-4</b>                    | Root1[S <sub>0</sub> ]                     |            | -828.74599 |            |      |
|                                 | Root2[S <sub>NP</sub> ( <sup>1</sup> nπ*)] | 828.63745  | -828.65916 | -830.36690 | 73.4 |
|                                 | Root3                                      |            | -828.51627 |            |      |
|                                 | Root4                                      |            | -828.50791 |            |      |
| <b>SNP-Min<br/>STC(SNP/TNP)</b> | Root1[S <sub>0</sub> ]                     |            | -828.74662 |            |      |
|                                 | Root2[S <sub>NP</sub> ( <sup>1</sup> nπ*)] | -828.66336 | -828.66142 | -830.37009 | 72.2 |
|                                 | Root3                                      |            | -828.51645 |            |      |
|                                 | Root4                                      |            | -828.50979 |            |      |
|                                 | Root1[T <sub>NP</sub> ( <sup>3</sup> nπ*)] |            | -828.67013 | -830.38184 | 64.8 |
|                                 | Root2                                      |            | -828.63112 |            |      |
|                                 | Root3                                      |            | -828.58478 |            |      |
|                                 | Root4                                      |            | -828.53514 |            |      |
| <b>TNP-1</b>                    | Root1[T <sub>NP</sub> ( <sup>3</sup> nπ*)] | -828.67685 | -828.67055 | -830.38374 | 63.6 |
|                                 | Root2                                      |            | -828.62991 |            |      |
|                                 | Root3                                      |            | -828.58954 |            |      |
|                                 | Root4                                      |            | -828.54066 |            |      |

|                                                |                                            |            |            |            |      |
|------------------------------------------------|--------------------------------------------|------------|------------|------------|------|
| <b>T<sub>NP-2</sub></b>                        | Root1[T <sub>NP</sub> ( <sup>3</sup> nπ*)] | -828.67708 | -828.67058 | -830.38461 | 63.0 |
|                                                | Root2                                      |            | -828.62481 |            |      |
|                                                | Root3                                      |            | -828.59365 |            |      |
|                                                | Root4                                      |            | -828.54405 |            |      |
| <b>T<sub>NP-3</sub><br/>T<sub>NP-Min</sub></b> | Root1[T <sub>NP</sub> ( <sup>3</sup> nπ*)] | -828.67684 | -828.67045 | -830.38539 | 62.5 |
|                                                | Root2                                      |            | -828.62429 |            |      |
|                                                | Root3                                      |            | -828.59513 |            |      |
|                                                | Root4                                      |            | -828.54628 |            |      |
| <b>T<sub>NP-4</sub></b>                        | Root1[T <sub>NP</sub> ( <sup>3</sup> nπ*)] | -828.67661 | -828.67027 | -830.38479 | 62.9 |
|                                                | Root2                                      |            | -828.62472 | -830.36235 |      |
|                                                | Root3                                      |            | -828.59431 |            |      |
|                                                | Root4                                      |            | -828.54468 |            |      |
| <b>T<sub>NP-5</sub></b>                        | Root1[T <sub>NP</sub> ( <sup>3</sup> nπ*)] | -828.67531 | -828.66903 | -830.38375 | 63.6 |
|                                                | Root2                                      |            | -828.62319 |            |      |
|                                                | Root3                                      |            | -828.59126 |            |      |
|                                                | Root4                                      |            | -828.54168 |            |      |
| <b>T<sub>NP-6</sub></b>                        | Root1[T <sub>NP</sub> ( <sup>3</sup> nπ*)] | -828.67155 | -828.66527 | -830.48761 | 64.5 |
|                                                | Root2                                      |            | -828.61606 |            |      |
|                                                | Root3                                      |            | -828.58562 |            |      |
|                                                | Root4                                      |            | -828.53609 |            |      |
| <b>T<sub>NP-7</sub><br/>T<sub>NP-TS</sub></b>  | Root1[T <sub>NP</sub> ( <sup>3</sup> nπ*)] | -828.66006 | -828.65402 | -830.37976 | 66.1 |
|                                                | Root2                                      |            | -828.59334 |            |      |
|                                                | Root3                                      |            | -828.57040 |            |      |
|                                                | Root4                                      |            | -828.52082 |            |      |
| <b>T<sub>NP-8</sub></b>                        | Root1[T <sub>NP</sub> ( <sup>3</sup> nπ*)] | -828.64728 | -828.64094 | -830.38172 | 64.9 |
|                                                | Root2                                      |            | -828.55713 |            |      |
|                                                | Root3                                      |            | -828.55136 |            |      |
|                                                | Root4                                      |            | -828.50181 |            |      |
| <b>T<sub>NP-9</sub></b>                        | Root1[T <sub>NP</sub> ( <sup>3</sup> nπ*)] | -828.64019 | -828.63472 | -830.38437 | 63.2 |
|                                                | Root2                                      |            | -828.53228 |            |      |
|                                                | Root3                                      |            | -828.52079 |            |      |

|                          |                                                         |            |            |            |      |
|--------------------------|---------------------------------------------------------|------------|------------|------------|------|
|                          | Root4                                                   |            | -828.48089 |            |      |
| <b>T<sub>NP-10</sub></b> | Root1[T <sub>NP</sub> ( <sup>3</sup> nπ*)]              | -828.63833 | -828.63085 | -830.38689 | 61.6 |
|                          | Root2                                                   |            | -828.52067 |            |      |
|                          | Root3                                                   |            | -828.47950 |            |      |
|                          | Root4                                                   |            | -828.46502 |            |      |
| <b>T<sub>NP-11</sub></b> | Root1[T <sub>NP</sub> ( <sup>3</sup> nπ*)]              | -828.63893 | -828.63110 | -830.37881 | 62.0 |
|                          | Root2                                                   |            | -828.51770 |            |      |
|                          | Root3                                                   |            | -828.47995 |            |      |
|                          | Root4                                                   |            | -828.46210 |            |      |
| <b>T<sub>NP-12</sub></b> | Root1[T <sub>NP</sub> ( <sup>3</sup> nπ*)]              | -828.66659 | -828.66078 | -830.38865 | 60.5 |
|                          | Root2                                                   |            | -828.50929 |            |      |
|                          | Root3                                                   |            | -828.48990 |            |      |
|                          | Root4                                                   |            | -828.45311 |            |      |
| <b>T<sub>NP-13</sub></b> | Root1[T <sub>NP</sub> ( <sup>3</sup> nπ*)]              | -828.67899 | -828.67265 | -830.39422 | 57.0 |
|                          | Root2                                                   |            | -828.52113 |            |      |
|                          | Root3                                                   |            | -828.50149 |            |      |
|                          | Root4                                                   |            | -828.46482 |            |      |
| <b>T<sub>NP-14</sub></b> | Root1[T <sub>NP</sub> ( <sup>3</sup> nπ*)]              | -828.68872 | -828.68819 | -830.40176 | 52.3 |
|                          | Root2                                                   |            | -828.53197 |            |      |
|                          | Root3                                                   |            | -828.51245 |            |      |
|                          | Root4                                                   |            | -828.48372 |            |      |
| <b>T<sub>NP-15</sub></b> | Root1[T <sub>NP</sub> ( <sup>3</sup> nπ*)]              | -828.69597 | -828.69550 | -830.40660 | 49.2 |
|                          | Root2                                                   |            | -828.53919 |            |      |
|                          | Root3                                                   |            | -828.52339 |            |      |
|                          | Root4                                                   |            | -828.49083 |            |      |
| <b>T<sub>NP-16</sub></b> | Root1[T <sub>NP</sub> ( <sup>3</sup> nπ*)]              | -828.70050 | -828.70007 | -830.40952 | 47.4 |
|                          | Root2                                                   |            | -828.54373 |            |      |
|                          | Root3                                                   |            | -828.52797 |            |      |
|                          | Root4                                                   |            | -828.49546 |            |      |
|                          | Root1[T <sub>ΣP</sub> (σ <sup>1</sup> π <sup>1</sup> )] | -828.70429 | -828.69900 | -830.40999 | 47.1 |

|                                                                                                                     |                                                        |             |             |             |      |
|---------------------------------------------------------------------------------------------------------------------|--------------------------------------------------------|-------------|-------------|-------------|------|
| <b>STC(T<sub>ΣP</sub>/S<sub>0</sub>)/<br/>T<sub>ΣP</sub>(σ<sup>1</sup>π<sup>1</sup>)-Min</b>                        | Root2                                                  |             | -828.62450  |             |      |
|                                                                                                                     | Root3                                                  |             | -828.53483  |             |      |
|                                                                                                                     | Root4                                                  |             | -828.52436  |             |      |
|                                                                                                                     |                                                        |             |             |             |      |
|                                                                                                                     | Root1[S <sub>0</sub> (σ <sup>2</sup> π <sup>0</sup> )] |             | -828.70386  | -830.41272  | 45.4 |
|                                                                                                                     | Root2                                                  |             | -828.54569  |             |      |
|                                                                                                                     | Root3                                                  |             | -828.53785  |             |      |
|                                                                                                                     | Root4                                                  |             | -828.49858  |             |      |
| <b>The Stepwise [2+1] cycloaddition driven by the T<sub>ΣP</sub>(σ<sup>1</sup>π<sup>1</sup>) carbene in Fig. 1a</b> |                                                        |             |             |             |      |
| <b>CYC-T<sub>1</sub>-1</b>                                                                                          | Root1[T <sub>1</sub> ]                                 | -1360.05451 | -1360.05633 | -1363.18180 | 45.1 |
|                                                                                                                     | Root2                                                  |             | -1359.93353 |             |      |
|                                                                                                                     | Root3                                                  |             | -1359.92046 |             |      |
|                                                                                                                     | Root4                                                  |             | -1359.89293 |             |      |
| <b>CYC-T<sub>1</sub>-2</b>                                                                                          | Root1[T <sub>1</sub> ]                                 | -1360.05346 | -1360.05490 | -1363.18168 | 45.2 |
|                                                                                                                     | Root2                                                  |             | -1359.93496 |             |      |
|                                                                                                                     | Root3                                                  |             | -1359.91869 |             |      |
|                                                                                                                     | Root4                                                  |             | -1359.89169 |             |      |
| <b>CYC-T<sub>1</sub>-3</b>                                                                                          | Root1[T <sub>1</sub> ]                                 | -1360.05161 | -1360.05291 | -1363.18142 | 45.3 |
|                                                                                                                     | Root2                                                  |             | -1359.93670 |             |      |
|                                                                                                                     | Root3                                                  |             | -1359.91584 |             |      |
|                                                                                                                     | Root4                                                  |             | -1359.88983 |             |      |
| <b>T<sub>1</sub>-TS</b>                                                                                             | Root1[T <sub>1</sub> ]                                 | -1360.04917 | -1360.05088 | -1363.18119 | 45.5 |
|                                                                                                                     | Root2                                                  |             | -1359.93856 |             |      |
|                                                                                                                     | Root3                                                  |             | -1359.91266 |             |      |
|                                                                                                                     | Root4                                                  |             | -1359.88794 |             |      |
| <b>CYC-T<sub>1</sub>-5</b>                                                                                          | Root1[T <sub>1</sub> ]                                 | -1360.04437 | -1360.04687 | -1363.18168 | 45.2 |
|                                                                                                                     | Root2                                                  |             | -1359.94260 |             |      |
|                                                                                                                     | Root3                                                  |             | -1359.90558 |             |      |
|                                                                                                                     | Root4                                                  |             | -1359.88412 |             |      |
| <b>CYC-T<sub>1</sub>-6</b>                                                                                          | Root1[T <sub>1</sub> ]                                 | -1360.04167 | -1360.04487 | -1363.18274 | 44.5 |
|                                                                                                                     | Root2                                                  |             | -1359.94397 |             |      |
|                                                                                                                     | Root3                                                  |             | -1359.90163 |             |      |
|                                                                                                                     | Root4                                                  |             | -1359.88220 |             |      |

|                                         |                        |             |             |             |      |
|-----------------------------------------|------------------------|-------------|-------------|-------------|------|
| <b>CYC-T<sub>1</sub>-7</b>              | Root1[T <sub>1</sub> ] | -1360.03933 | -1360.03822 | -1363.18538 | 42.8 |
|                                         | Root2                  |             | -1359.93582 |             |      |
|                                         | Root3                  |             | -1359.88806 |             |      |
|                                         | Root4                  |             | -1359.87687 |             |      |
| <b>CYC-T<sub>1</sub>-8</b>              | Root1[T <sub>1</sub> ] | -1360.04234 | -1360.04185 | -1363.18971 | 40.1 |
|                                         | Root2                  |             | -1359.93652 |             |      |
|                                         | Root3                  |             | -1359.88882 |             |      |
|                                         | Root4                  |             | -1359.87754 |             |      |
| <b>CYC-T<sub>1</sub>-9</b>              | Root1[T <sub>1</sub> ] | -1360.05270 | -1360.04788 | -1363.19365 | 37.7 |
|                                         | Root2                  |             | -1359.96193 |             |      |
|                                         | Root3                  |             | -1359.92611 |             |      |
|                                         | Root4                  |             | -1359.89320 |             |      |
| <b>CYC-T<sub>1</sub>-10</b>             | Root1[T <sub>1</sub> ] | -1360.06015 | -1360.05653 | -1363.20213 | 32.3 |
|                                         | Root2                  |             | -1359.95877 |             |      |
|                                         | Root3                  |             | -1359.90834 |             |      |
|                                         | Root4                  |             | -1359.90048 |             |      |
| <b>CYC-T<sub>1</sub>-11</b>             | Root1[T <sub>1</sub> ] | -1360.06736 | -1360.06561 | -1363.20841 | 28.4 |
|                                         | Root2                  |             | -1359.95843 |             |      |
|                                         | Root3                  |             | -1359.90878 |             |      |
|                                         | Root4                  |             | -1359.87134 |             |      |
| <b>CYC-T<sub>1</sub>-12</b>             | Root1[T <sub>1</sub> ] | -1360.07448 | -1360.07358 | -1363.21739 | 22.8 |
|                                         | Root2                  |             | -1359.95776 |             |      |
|                                         | Root3                  |             | -1359.91493 |             |      |
|                                         | Root4                  |             | -1359.87742 |             |      |
| <b>CYC-T<sub>1</sub>-13</b>             | Root1[T <sub>1</sub> ] | -1360.08005 | -1360.08076 | -1363.22590 | 17.4 |
|                                         | Root2                  |             | -1359.96005 |             |      |
|                                         | Root3                  |             | -1359.92013 |             |      |
|                                         | Root4                  |             | -1359.88250 |             |      |
| <b>STC(T<sub>1</sub>/S<sub>0</sub>)</b> | Root1[T <sub>1</sub> ] | -1360.08406 | -1360.08928 | -1363.22902 | 15.5 |
|                                         | Root2                  |             | -1359.93110 |             |      |

|                            |                        |             |             |             |       |
|----------------------------|------------------------|-------------|-------------|-------------|-------|
|                            | Root3                  |             | -1359.93047 |             |       |
|                            | Root4                  |             | -1359.88841 |             |       |
|                            |                        |             |             |             |       |
|                            | Root1[S <sub>0</sub> ] |             | -1360.08283 | -1363.23086 | 14.3  |
|                            | Root2                  |             | -1359.95745 |             |       |
|                            | Root3                  |             | -1359.92112 |             |       |
|                            | Root4                  |             | -1359.87559 |             |       |
|                            |                        |             |             |             |       |
| <b>CYC-S<sub>0</sub>-1</b> | Root1[S <sub>0</sub> ] | -1360.09070 | -1360.08891 | -1363.23739 | 10.2  |
|                            | Root2                  |             | -1359.95158 |             |       |
|                            | Root3                  |             | -1359.91930 |             |       |
|                            | Root4                  |             | -1359.87387 |             |       |
|                            |                        |             |             |             |       |
| <b>CYC-S<sub>0</sub>-2</b> | Root1[S <sub>0</sub> ] | -1360.09654 | -1360.09501 | -1363.24465 | 5.7   |
|                            | Root2                  |             | -1359.94105 |             |       |
|                            | Root3                  |             | -1359.91162 |             |       |
|                            | Root4                  |             | -1359.86723 |             |       |
|                            |                        |             |             |             |       |
| <b>CYC-S<sub>0</sub>-3</b> | Root1[S <sub>0</sub> ] | -1360.10267 | -1360.10092 | -1363.25402 | -0.2  |
|                            | Root2                  |             | -1359.90672 |             |       |
|                            | Root3                  |             | -1359.89563 |             |       |
|                            | Root4                  |             | -1359.88339 |             |       |
|                            |                        |             |             |             |       |
| <b>CYC-S<sub>0</sub>-4</b> | Root1[S <sub>0</sub> ] | -1360.11012 | -1360.10798 | -1363.26108 | -4.7  |
|                            | Root2                  |             | -1359.89059 |             |       |
|                            | Root3                  |             | -1359.87657 |             |       |
|                            | Root4                  |             | -1359.87410 |             |       |
|                            |                        |             |             |             |       |
| <b>CYC-S<sub>0</sub>-5</b> | Root1[S <sub>0</sub> ] | -1360.11929 | -1360.12149 | -1363.26840 | -9.2  |
|                            | Root2                  |             | -1359.90611 |             |       |
|                            | Root3                  |             | -1359.83838 |             |       |
|                            | Root4                  |             | -1359.83782 |             |       |
|                            |                        |             |             |             |       |
| <b>CYC-S<sub>0</sub>-6</b> | Root1[S <sub>0</sub> ] | -1360.12916 | -1360.13290 | -1363.27722 | -14.8 |
|                            | Root2                  |             | -1359.91849 |             |       |
|                            | Root3                  |             | -1359.84937 |             |       |
|                            | Root4                  |             | -1359.80148 |             |       |
|                            |                        |             |             |             |       |

|                                                                                                                                              |                                                         |             |             |             |       |
|----------------------------------------------------------------------------------------------------------------------------------------------|---------------------------------------------------------|-------------|-------------|-------------|-------|
| <b>CYC-S<sub>0</sub>-7</b>                                                                                                                   | Root1[S <sub>0</sub> ]                                  | -1360.13865 | -1360.14227 | -1363.28714 | -21.0 |
|                                                                                                                                              | Root2                                                   |             | -1359.92789 |             |       |
|                                                                                                                                              | Root3                                                   |             | -1359.85866 |             |       |
|                                                                                                                                              | Root4                                                   |             | -1359.81070 |             |       |
| <b>CYC-S<sub>0</sub>-8</b>                                                                                                                   | Root1[S <sub>0</sub> ]                                  | -1360.14572 | -1360.14953 | -1363.29480 | -25.8 |
|                                                                                                                                              | Root2                                                   |             | -1359.93507 |             |       |
|                                                                                                                                              | Root3                                                   |             | -1359.86568 |             |       |
|                                                                                                                                              | Root4                                                   |             | -1359.81795 |             |       |
| <b>CYC-S<sub>0</sub>-9</b>                                                                                                                   | Root1[S <sub>0</sub> ]                                  | -1360.14906 | -1360.15273 | -1363.29808 | -27.9 |
|                                                                                                                                              | Root2                                                   |             | -1359.93817 |             |       |
|                                                                                                                                              | Root3                                                   |             | -1359.86888 |             |       |
|                                                                                                                                              | Root4                                                   |             | -1359.82105 |             |       |
| <b>P1</b>                                                                                                                                    | Root1[S <sub>0</sub> ]                                  | -1360.16063 | -1360.16665 | -1363.30890 | -34.7 |
|                                                                                                                                              | Root2                                                   |             | -1359.95128 |             |       |
|                                                                                                                                              | Root3                                                   |             | -1359.88276 |             |       |
|                                                                                                                                              | Root4                                                   |             | -1359.83466 |             |       |
| <b>The [2+1] cycloaddition in a concerted asynchronous manner driven by the S<sub>0</sub>(σ<sup>2</sup>π<sup>0</sup>) carbene in Fig. 1b</b> |                                                         |             |             |             |       |
| <b>T<sub>ΣP</sub>(σ<sup>1</sup>π<sup>1</sup>)-Min //STC(T<sub>ΣP</sub>/S<sub>0</sub>)</b>                                                    | Root1[T <sub>ΣP</sub> (σ <sup>1</sup> π <sup>1</sup> )] | -828.70429  | -828.69900  | -830.40999  | 47.1  |
|                                                                                                                                              | Root2                                                   |             | -828.62450  |             |       |
|                                                                                                                                              | Root3                                                   |             | -828.53483  |             |       |
|                                                                                                                                              | Root4                                                   |             | -828.52436  |             |       |
|                                                                                                                                              | Root1[S <sub>0</sub> (σ <sup>2</sup> π <sup>0</sup> )]  |             | -828.70386  | -830.41272  | 45.4  |
|                                                                                                                                              | Root2                                                   |             | -828.54569  |             |       |
|                                                                                                                                              | Root3                                                   |             | -828.53785  |             |       |
|                                                                                                                                              | Root4                                                   |             | -828.49858  |             |       |
| <b>S<sub>0</sub>-1</b>                                                                                                                       | Root1[S <sub>0</sub> (σ <sup>2</sup> π <sup>0</sup> )]  | -828.71655  | -828.70602  | -830.41746  | 42.4  |
|                                                                                                                                              | Root2                                                   |             | -828.24533  |             |       |
|                                                                                                                                              | Root3                                                   |             | -828.53122  |             |       |
|                                                                                                                                              | Root4                                                   |             | -828.51607  |             |       |
| <b>S<sub>0</sub>-2</b>                                                                                                                       | Root1[S <sub>0</sub> (σ <sup>2</sup> π <sup>0</sup> )]  | -828.71928  | -828.70958  | -830.42146  | 39.9  |
|                                                                                                                                              | Root2                                                   |             | -828.61943  |             |       |

|                                                      |                                           |             |             |             |      |
|------------------------------------------------------|-------------------------------------------|-------------|-------------|-------------|------|
|                                                      | Root3                                     |             | -828.52835  |             |      |
|                                                      | Root4                                     |             | -828.50826  |             |      |
|                                                      |                                           |             |             |             |      |
| <b>S<sub>0-3</sub></b>                               | Root1[S <sub>0</sub> ( $\sigma^2\pi^0$ )] | -828.72148  | -828.71209  | -830.42431  | 38.1 |
|                                                      | Root2                                     |             | -828.61694  |             |      |
|                                                      | Root3                                     |             | -828.52627  |             |      |
|                                                      | Root4                                     |             | -828.50198  |             |      |
|                                                      |                                           |             |             |             |      |
| <b>S<sub>0-4</sub></b>                               | Root1[S <sub>0</sub> ( $\sigma^2\pi^0$ )] | -828.72419  | -828.71883  | -830.43283  | 32.8 |
|                                                      | Root2                                     |             | -828.61050  |             |      |
|                                                      | Root3                                     |             | -828.52471  |             |      |
|                                                      | Root4                                     |             | -828.49046  |             |      |
|                                                      |                                           |             |             |             |      |
| <b>S<sub>0-5</sub></b>                               | Root1[S <sub>0</sub> ( $\sigma^2\pi^0$ )] | -828.72621  | -828.72069  | -830.43478  | 31.6 |
|                                                      | Root2                                     |             | -828.60819  |             |      |
|                                                      | Root3                                     |             | -828.52275  |             |      |
|                                                      | Root4                                     |             | -828.49230  |             |      |
|                                                      |                                           |             |             |             |      |
| <b>S<sub>0-6</sub></b>                               | Root1[S <sub>0</sub> ( $\sigma^2\pi^0$ )] | -828.72781  | -828.72185  | -830.43611  | 30.7 |
|                                                      | Root2                                     |             | -828.60617  |             |      |
|                                                      | Root3                                     |             | -828.52072  |             |      |
|                                                      | Root4                                     |             | -828.49327  |             |      |
|                                                      |                                           |             |             |             |      |
| <b>S<sub>0-7</sub></b>                               | Root1[S <sub>0</sub> ( $\sigma^2\pi^0$ )] | -828.73376  | -828.72376  | -830.43794  | 29.6 |
|                                                      | Root2                                     |             | -828.60250  |             |      |
|                                                      | Root3                                     |             | -828.51690  |             |      |
|                                                      | Root4                                     |             | -828.49471  |             |      |
|                                                      |                                           |             |             |             |      |
| <b>S<sub>0</sub>(<math>\sigma^2\pi^0</math>)-Min</b> | Root1[S <sub>0</sub> ( $\sigma^2\pi^0$ )] | -828.73304  | -828.72560  | -830.43970  | 28.5 |
|                                                      | Root2                                     |             | -828.60040  |             |      |
|                                                      | Root3                                     |             | -828.51900  |             |      |
|                                                      | Root4                                     |             | -828.49560  |             |      |
|                                                      |                                           |             |             |             |      |
| <b>CYC-S<sub>0-1</sub></b>                           | Root1[S <sub>0</sub> ]                    | -1360.10144 | -1360.10115 | -1363.20880 | 28.2 |
|                                                      | Root2                                     |             | -1359.92109 |             |      |
|                                                      | Root3                                     |             | -1359.82191 |             |      |
|                                                      | Root4                                     |             | -1359.80648 |             |      |
|                                                      |                                           |             |             |             |      |



|                             |                        |             |             |             |      |
|-----------------------------|------------------------|-------------|-------------|-------------|------|
| <b>CYC-S<sub>0</sub>-2</b>  | Root1[S <sub>0</sub> ] | -1360.09927 | -1360.09872 | -1363.20858 | 28.3 |
|                             | Root2                  |             | -1359.91863 |             |      |
|                             | Root3                  |             | -1359.81939 |             |      |
|                             | Root4                  |             | -1359.80395 |             |      |
| <b>CYC-S<sub>0</sub>-3</b>  | Root1[S <sub>0</sub> ] | -1360.09287 | -1360.09413 | -1363.20429 | 31.0 |
|                             | Root2                  |             | -1359.91367 |             |      |
|                             | Root3                  |             | -1359.79974 |             |      |
|                             | Root4                  |             | -1359.79721 |             |      |
| <b>CYC-S<sub>0</sub>-4</b>  | Root1[S <sub>0</sub> ] | -1360.08929 | -1360.09019 | -1363.20315 | 31.7 |
|                             | Root2                  |             | -1359.90971 |             |      |
|                             | Root3                  |             | -1359.79579 |             |      |
|                             | Root4                  |             | -1359.79313 |             |      |
| <b>CYC-S<sub>0</sub>-5</b>  | Root1[S <sub>0</sub> ] | -1360.08685 | -1360.08768 | -1363.20251 | 32.1 |
|                             | Root2                  |             | -1359.90718 |             |      |
|                             | Root3                  |             | -1359.79324 |             |      |
|                             | Root4                  |             | -1359.79055 |             |      |
| <b>CYC-S<sub>0</sub>-6</b>  | Root1[S <sub>0</sub> ] | -1360.08366 | -1360.08447 | -1363.20187 | 32.5 |
|                             | Root2                  |             | -1359.90395 |             |      |
|                             | Root3                  |             | -1359.79001 |             |      |
|                             | Root4                  |             | -1359.78731 |             |      |
| <b>CYC-S<sub>0</sub>-TS</b> | Root1[S <sub>0</sub> ] | -1360.08053 | -1360.08126 | -1363.20159 | 33.0 |
|                             | Root2                  |             | -1359.90067 |             |      |
|                             | Root3                  |             | -1359.78675 |             |      |
|                             | Root4                  |             | -1359.78401 |             |      |
| <b>CYC-S<sub>0</sub>-8</b>  | Root1[S <sub>0</sub> ] | -1360.07642 | -1360.07702 | -1363.20239 | 32.2 |
|                             | Root2                  |             | -1359.89633 |             |      |
|                             | Root3                  |             | -1359.78241 |             |      |
|                             | Root4                  |             | -1359.77969 |             |      |
| <b>CYC-S<sub>0</sub>-9</b>  | Root1[S <sub>0</sub> ] | -1360.07132 | -1360.07178 | -1363.20485 | 30.6 |
|                             | Root2                  |             | -1359.88860 |             |      |
|                             | Root3                  |             | -1359.77505 |             |      |

|                             |                        |             |             |             |      |
|-----------------------------|------------------------|-------------|-------------|-------------|------|
|                             | Root4                  |             | -1359.77133 |             |      |
| <b>CYC-S<sub>0</sub>-10</b> | Root1[S <sub>0</sub> ] | -1360.06371 | -1360.05853 | -1363.20943 | 27.8 |
|                             | Root2                  |             | -1359.93209 |             |      |
|                             | Root3                  |             | -1359.91556 |             |      |
|                             | Root4                  |             | -1359.85465 |             |      |
| <b>CYC-S<sub>0</sub>-11</b> | Root1[S <sub>0</sub> ] | -1360.06383 | -1360.05980 | -1363.21516 | 24.2 |
|                             | Root2                  |             | -1359.92539 |             |      |
|                             | Root3                  |             | -1359.91576 |             |      |
|                             | Root4                  |             | -1359.85978 |             |      |
| <b>CYC-S<sub>0</sub>-12</b> | Root1[S <sub>0</sub> ] | -1360.06877 | -1360.06475 | -1363.22309 | 19.2 |
|                             | Root2                  |             | -1359.92311 |             |      |
|                             | Root3                  |             | -1359.89741 |             |      |
|                             | Root4                  |             | -1359.86940 |             |      |
| <b>CYC-S<sub>0</sub>-13</b> | Root1[S <sub>0</sub> ] | -1360.08479 | -1360.08259 | -1363.23142 | 14.0 |
|                             | Root2                  |             | -1359.90595 |             |      |
|                             | Root3                  |             | -1359.90196 |             |      |
|                             | Root4                  |             | -1359.86349 |             |      |
| <b>CYC-S<sub>0</sub>-14</b> | Root1[S <sub>0</sub> ] | -1360.09053 | -1360.08923 | -1363.23653 | 10.8 |
|                             | Root2                  |             | -1359.91661 |             |      |
|                             | Root3                  |             | -1359.90898 |             |      |
|                             | Root4                  |             | -1359.87418 |             |      |
| <b>CYC-S<sub>0</sub>-15</b> | Root1[S <sub>0</sub> ] | -1360.09904 | -1360.10269 | -1363.24232 | 7.1  |
|                             | Root2                  |             | -1359.93952 |             |      |
|                             | Root3                  |             | -1359.92798 |             |      |
|                             | Root4                  |             | -1359.92084 |             |      |
| <b>CYC-S<sub>0</sub>-16</b> | Root1[S <sub>0</sub> ] | -1360.10623 | -1360.09830 | -1363.25078 | 1.8  |
|                             | Root2                  |             | -1359.92919 |             |      |
|                             | Root3                  |             | -1359.91826 |             |      |
|                             | Root4                  |             | -1359.88677 |             |      |
| <b>CYC-S<sub>0</sub>-17</b> | Root1[S <sub>0</sub> ] | -1360.11249 | -1360.10907 | -1363.25802 | -2.7 |

|                             |                        |             |             |             |       |
|-----------------------------|------------------------|-------------|-------------|-------------|-------|
|                             | Root2                  |             | -1359.93678 |             |       |
|                             | Root3                  |             | -1359.92716 |             |       |
|                             | Root4                  |             | -1359.91527 |             |       |
|                             |                        |             |             |             |       |
| <b>CYC-S<sub>0</sub>-18</b> | Root1[S <sub>0</sub> ] | -1360.11888 | -1360.11545 | -1363.26519 | -7.2  |
|                             | Root2                  |             | -1359.93344 |             |       |
|                             | Root3                  |             | -1359.90884 |             |       |
|                             | Root4                  |             | -1359.89011 |             |       |
|                             |                        |             |             |             |       |
| <b>CYC-S<sub>0</sub>-19</b> | Root1[S <sub>0</sub> ] | -1360.13144 | -1360.13270 | -1363.27623 | -14.2 |
|                             | Root2                  |             | -1359.95351 |             |       |
|                             | Root3                  |             | -1359.83776 |             |       |
|                             | Root4                  |             | -1359.83595 |             |       |
|                             |                        |             |             |             |       |
| <b>CYC-S<sub>0</sub>-20</b> | Root1[S <sub>0</sub> ] | -1360.14981 | -1360.15205 | -1363.29240 | -24.3 |
|                             | Root2                  |             | -1359.97282 |             |       |
|                             | Root3                  |             | -1359.85633 |             |       |
|                             | Root4                  |             | -1359.85513 |             |       |
|                             |                        |             |             |             |       |
| <b>CYC-S<sub>0</sub>-21</b> | Root1[S <sub>0</sub> ] | -1360.14557 | -1360.15077 | -1363.29674 | -27.0 |
|                             | Root2                  |             | -1359.93552 |             |       |
|                             | Root3                  |             | -1359.86679 |             |       |
|                             | Root4                  |             | -1359.81794 |             |       |
|                             |                        |             |             |             |       |
| <b>P1</b>                   | Root1[S <sub>0</sub> ] | -1360.16063 | -1360.16665 | -1363.30890 | -34.7 |
|                             | Root2                  |             | -1359.95128 |             |       |
|                             | Root3                  |             | -1359.88276 |             |       |
|                             | Root4                  |             | -1359.83466 |             |       |

**Table S8.** Absolute energies (A.E., Hartree) and relative energies (R.E., kcal/mol) for the optimized structures of **1** along the pathways for photogeneration of siloxy carbene in S<sub>NP</sub>(<sup>1</sup>nπ\*) state obtained by CASPT2//CASSCF/PCM calculations. The corresponding energy profile is plotted in Fig. 2.

| <b>1</b>                 |                                            | <b>CASSCF</b> | <b>RASSCF</b> | <b>CASPT2</b> |             |
|--------------------------|--------------------------------------------|---------------|---------------|---------------|-------------|
|                          |                                            | <b>A.E.</b>   | <b>A.E.</b>   | <b>A.E.</b>   | <b>R.E.</b> |
| <b>S<sub>0</sub>-Min</b> | Root1[S <sub>0</sub> ]                     | -828.75867    | -828.77721    | -830.48507    | 0.0         |
|                          | Root2[S <sub>NP</sub> ( <sup>1</sup> nπ*)] |               | -828.63471    | -830.35755    | 80.0        |

|                                                       |                                            |            |            |            |       |
|-------------------------------------------------------|--------------------------------------------|------------|------------|------------|-------|
|                                                       | Root3                                      |            | -828.54403 |            |       |
|                                                       | Root4                                      |            | -828.48922 |            |       |
| <b>SNP-1</b>                                          | Root1[S <sub>0</sub> ]                     |            | -828.77563 | -830.48761 | -9.0  |
|                                                       | Root2[S <sub>NP</sub> ( <sup>1</sup> nπ*)] | -828.61538 | -828.63751 | -830.36235 | 77.0  |
|                                                       | Root3                                      |            | -828.54730 |            |       |
|                                                       | Root4                                      |            | -828.49375 |            |       |
| <b>SNP-2</b>                                          | Root1[S <sub>0</sub> ]                     |            | -828.77352 | -830.48498 | 0.06  |
|                                                       | Root2[S <sub>NP</sub> ( <sup>1</sup> nπ*)] | -828.62476 | -828.64692 | -830.36559 | 75.0  |
|                                                       | Root3                                      |            | -828.54516 | -830.29915 |       |
|                                                       | Root4                                      |            | -828.50111 | -830.23675 |       |
| <b>SNP-3</b>                                          | Root1[S <sub>0</sub> ]                     |            | -828.76011 | -830.47266 | 7.8   |
|                                                       | Root2[S <sub>NP</sub> ( <sup>1</sup> nπ*)] | -828.63389 | -828.65560 | -830.36691 | 74.2  |
|                                                       | Root3                                      |            | -828.53089 | -830.28734 |       |
|                                                       | Root4                                      |            | -828.50597 | -830.23376 |       |
| <b>SNP-4</b>                                          | Root1[S <sub>0</sub> ]                     |            | -828.74599 | -830.46306 | 17.2  |
|                                                       | Root2[S <sub>NP</sub> ( <sup>1</sup> nπ*)] | 828.63745  | -828.65916 | -830.36690 | 73.4  |
|                                                       | Root3                                      |            | -828.51627 | -830.27798 |       |
|                                                       | Root4                                      |            | -828.50791 | -830.23231 |       |
| <b>SNP-Min<br/>STC(S<sub>NP</sub>/T<sub>NP</sub>)</b> | Root1[S <sub>0</sub> ]                     |            | -828.74662 | -830.45775 | 17.1  |
|                                                       | Root2[S <sub>NP</sub> ( <sup>1</sup> nπ*)] | -828.66336 | -828.66142 | -830.37009 | 72.2  |
|                                                       | Root3                                      |            | -828.51645 |            |       |
|                                                       | Root4                                      |            | -828.50979 |            |       |
|                                                       | Root1[T <sub>NP</sub> ( <sup>3</sup> nπ*)] |            | -828.67013 | -830.38184 | 64.8  |
|                                                       | Root2                                      |            | -828.63112 |            |       |
|                                                       | Root3                                      |            | -828.58478 |            |       |
|                                                       | Root4                                      |            | -828.53514 |            |       |
| <b>SNP-6</b>                                          | Root1                                      |            | -830.45849 | -830.45849 | 16.68 |
|                                                       | Root2[S <sub>NP</sub> ( <sup>1</sup> nπ*)] | -828.66155 | -830.36903 | -830.36903 | 72.82 |
|                                                       | Root3                                      |            | -830.45849 |            |       |
|                                                       | Root4                                      |            | -830.36903 |            |       |
| <b>SNP-7</b>                                          | Root1                                      |            | -828.74030 | -830.45301 | 20.1  |
|                                                       | Root2[S <sub>NP</sub> ( <sup>1</sup> nπ*)] | -828.65674 | -828.65498 | -830.36475 | 75.5  |

|               |                               |            |            |            |      |
|---------------|-------------------------------|------------|------------|------------|------|
|               | Root3                         |            | -828.51105 |            |      |
|               | Root4                         |            | -828.50491 |            |      |
|               |                               |            |            |            |      |
| <b>SNP-8</b>  | Root1                         |            | -828.73667 | -830.44996 | 22.0 |
|               | Root2[SNP( <sup>1</sup> nπ*)] | -828.65303 | -828.65118 | -830.36226 | 77.1 |
|               | Root3                         |            | -828.50752 |            |      |
|               | Root4                         |            | -828.50185 |            |      |
|               |                               |            |            |            |      |
| <b>SNP-9</b>  | Root1                         |            | -828.73138 | -830.44564 | 24.7 |
|               | Root2[SNP( <sup>1</sup> nπ*)] | -828.64732 | -828.64540 | -830.35867 | 79.3 |
|               | Root3                         |            | -828.50225 |            |      |
|               | Root4                         |            | -828.49708 |            |      |
|               |                               |            |            |            |      |
| <b>SNP-10</b> | Root1                         |            | -828.72417 | -830.44018 | 28.2 |
|               | Root2[SNP( <sup>1</sup> nπ*)] | -828.63901 | -828.63693 | -830.35403 | 82.2 |
|               | Root3                         |            | -828.49496 |            |      |
|               | Root4                         |            | -828.49011 |            |      |
|               |                               |            |            |            |      |
| <b>SNP-11</b> | Root1                         |            | -828.65914 | -830.40270 | 51.7 |
|               | Root2[SNP( <sup>1</sup> nπ*)] | -828.58858 | -828.58886 | -830.34982 | 84.9 |
|               | Root3                         |            | -828.48329 |            |      |
|               | Root4                         |            | -828.47409 |            |      |
|               |                               |            |            |            |      |
| <b>SNP-12</b> | Root1                         |            | -828.65248 | -830.39089 | 59.1 |
|               | Root2[SNP( <sup>1</sup> nπ*)] | -828.59020 | -828.58864 | -830.34751 | 86.3 |
|               | Root3                         |            | -828.49705 |            |      |
|               | Root4                         |            | -828.48169 |            |      |
|               |                               |            |            |            |      |
| <b>SNP-13</b> | Root1                         |            | -828.64898 | -830.38429 | 63.2 |
|               | Root2[SNP( <sup>1</sup> nπ*)] | -828.59194 | -828.58949 | -830.34647 | 87.0 |
|               | Root3                         |            | -828.50341 |            |      |
|               | Root4                         |            | -828.48563 |            |      |
|               |                               |            |            |            |      |
| <b>SNP-TS</b> | Root1                         |            | -828.64701 | -830.37389 | 69.8 |
|               | Root2[SNP( <sup>1</sup> nπ*)] | -828.59439 | -828.59140 | -830.34572 | 87.4 |
|               | Root3                         |            | -828.50888 |            |      |
|               | Root4                         |            | -828.48992 |            |      |
|               |                               |            |            |            |      |
| <b>SNP-15</b> | Root1                         |            | -828.65108 | -830.37312 | 70.2 |

|                                                       |                                            |            |            |            |      |
|-------------------------------------------------------|--------------------------------------------|------------|------------|------------|------|
|                                                       | Root2[S <sub>NP</sub> ( <sup>1</sup> nπ*)] | -828.60463 | -828.60086 | -830.34671 | 86.8 |
|                                                       | Root3                                      |            | -828.51879 |            |      |
|                                                       | Root4                                      |            | -828.50417 |            |      |
|                                                       |                                            |            |            |            |      |
| <b>S<sub>NP</sub>-16</b>                              | Root1                                      |            | -828.65701 | -830.37612 | 68.4 |
|                                                       | Root2[S <sub>NP</sub> ( <sup>1</sup> nπ*)] | -828.61019 | -828.60776 | -830.34886 | 85.5 |
|                                                       | Root3                                      |            | -828.52622 |            |      |
|                                                       | Root4                                      |            | -828.51387 |            |      |
|                                                       |                                            |            |            |            |      |
| <b>S<sub>NP</sub>-17</b>                              | Root1                                      |            | -828.67160 | -830.38620 | 62.0 |
|                                                       | Root2[S <sub>NP</sub> ( <sup>1</sup> nπ*)] | -828.61882 | -828.61659 | -830.35401 | 82.2 |
|                                                       | Root3                                      |            | -828.53206 |            |      |
|                                                       | Root4                                      |            | -828.52626 |            |      |
|                                                       |                                            |            |            |            |      |
| <b>S<sub>NP</sub>-18</b>                              | Root1                                      |            | -828.67704 | -830.39042 | 59.4 |
|                                                       | Root2[S <sub>NP</sub> ( <sup>1</sup> nπ*)] | -828.62167 | -828.61959 | -830.35611 | 80.9 |
|                                                       | Root3                                      |            | -828.53399 |            |      |
|                                                       | Root4                                      |            | -828.53001 |            |      |
|                                                       |                                            |            |            |            |      |
| <b>S<sub>NP</sub>-19</b>                              | Root1                                      |            | -828.67995 | -830.39258 | 58.0 |
|                                                       | Root2[S <sub>NP</sub> ( <sup>1</sup> nπ*)] | -828.62478 | -828.62241 | -830.35779 | 79.9 |
|                                                       | Root3                                      |            | -828.53632 |            |      |
|                                                       | Root4                                      |            | -828.53287 |            |      |
|                                                       |                                            |            |            |            |      |
| <b>S<sub>ΣP</sub>(σ<sup>1</sup>π<sup>1</sup>)-Min</b> | Root1                                      |            | -828.68231 | -830.39423 | 57.0 |
|                                                       | Root2[S <sub>NP</sub> ( <sup>1</sup> σπ*)] | -828.62610 | -828.62359 | -830.35826 | 79.6 |
|                                                       | Root3                                      |            | -828.53605 |            |      |
|                                                       | Root4                                      |            | -828.53371 |            |      |

**Table S9.** Absolute energies (A.E., Hartree) and relative energies (R.E., kcal/mol) for the optimized structures of **3** along the pathways for photogeneration of siloxy carbene mediated by S<sub>NP</sub>(<sup>1</sup>nπ\*) state and the intramolecular [2+1] cycloaddition obtained by CASPT2//CASSCF/PCM calculations. The corresponding energy profile is plotted in Fig. 3a.

| <b>3</b>                 |                        | <b>CASSCF</b> | <b>RASSCF</b> | <b>CASPT2</b> |             |
|--------------------------|------------------------|---------------|---------------|---------------|-------------|
|                          |                        | <b>A.E.</b>   | <b>A.E.</b>   | <b>A.E.</b>   | <b>R.E.</b> |
| <b>S<sub>0</sub>-Min</b> | Root1[S <sub>0</sub> ] | -2149.94818   | -2150.05847   | -2153.61137   | 0.0         |

|                                                     |                               |             |             |             |      |
|-----------------------------------------------------|-------------------------------|-------------|-------------|-------------|------|
|                                                     | Root2[ $S_{NP}(^1n\pi^*)$ ]   |             | -2149.92975 | -2153.50001 | 69.9 |
|                                                     | Root3[ $S_{PP}(^1\pi\pi^*)$ ] |             | -2149.83928 | -2153.45876 | 95.8 |
|                                                     | Root4                         |             | -2149.81428 |             |      |
|                                                     | Root5                         |             | -2149.77968 |             |      |
|                                                     |                               |             |             |             |      |
| <b>SNP-1</b>                                        | Root1[ $S_0$ ]                |             | -2150.05639 | -2153.61037 | 0.6  |
|                                                     | Root2[ $S_{NP}(^1n\pi^*)$ ]   | -2149.93547 | -2149.93860 | -2153.50363 | 67.6 |
|                                                     | Root3                         |             | -2149.84001 |             |      |
|                                                     | Root4                         |             | -2149.82056 |             |      |
|                                                     | Root5                         |             | -2149.78589 |             |      |
|                                                     |                               |             |             |             |      |
| <b>SNP-2</b>                                        | Root1[ $S_0$ ]                |             | -2150.03278 | -2153.59376 | 11.0 |
|                                                     | Root2[ $S_{NP}(^1n\pi^*)$ ]   | -2149.94808 | -2149.95098 | -2153.50812 | 64.8 |
|                                                     | Root3                         |             | -2149.83730 |             |      |
|                                                     | Root4                         |             | -2149.82403 |             |      |
|                                                     | Root5                         |             | -2149.80345 |             |      |
|                                                     |                               |             |             |             |      |
| <b>SNP-3</b>                                        | Root1[ $S_0$ ]                |             | -2150.03148 | -2153.59236 | 11.9 |
|                                                     | Root2[ $S_{NP}(^1n\pi^*)$ ]   | -2149.94862 | -2149.95152 | -2153.50846 | 64.6 |
|                                                     | Root3                         |             | -2149.83768 |             |      |
|                                                     | Root4                         |             | -2149.82471 |             |      |
|                                                     | Root5                         |             | -2149.80388 |             |      |
|                                                     |                               |             |             |             |      |
| <b>SNP-4</b>                                        | Root1[ $S_0$ ]                |             | -2150.03066 | -2153.59274 | 11.7 |
|                                                     | Root2[ $S_{NP}(^1n\pi^*)$ ]   | -2149.94916 | -2149.95207 | -2153.51012 | 63.5 |
|                                                     | Root3                         |             | -2149.83860 |             |      |
|                                                     | Root4                         |             | -2149.82654 |             |      |
|                                                     | Root5                         |             | -2149.80405 |             |      |
|                                                     |                               |             |             |             |      |
| <b>SNP-Min/<br/>STC(<math>S_{NP}/T_{NP}</math>)</b> | Root1[ $S_0$ ]                |             | -2150.03287 | -2153.59320 | 11.4 |
|                                                     | Root2[ $S_{NP}(^1n\pi^*)$ ]   | -2149.94819 | -2149.95309 | -2153.51076 | 63.1 |
|                                                     | Root3                         |             | -2149.83894 |             |      |
|                                                     | Root4                         |             | -2149.83197 |             |      |
|                                                     | Root5                         |             | -2149.79791 |             |      |
|                                                     | Root1[ $T_{NP}(^3n\pi^*)$ ]   |             | -2149.96020 | -2153.51991 | 57.4 |
|                                                     | Root2                         |             | -2149.92818 |             |      |
|                                                     | Root3                         |             | -2149.87926 |             |      |
|                                                     | Root4                         |             | -2149.84867 |             |      |
|                                                     | Root5                         |             | -2149.83902 |             |      |

|               |                                            |             |             |             |      |
|---------------|--------------------------------------------|-------------|-------------|-------------|------|
| <b>SNP-6</b>  | Root1[S <sub>0</sub> ]                     |             | -2150.02578 | -2153.58837 | 14.4 |
|               | Root2[S <sub>NP</sub> ( <sup>1</sup> nπ*)] | -2149.94601 | -2149.95023 | -2153.50907 | 64.2 |
|               | Root3                                      |             | -2149.83799 |             |      |
|               | Root4                                      |             | -2149.83138 |             |      |
|               | Root5                                      |             | -2149.80104 |             |      |
| <b>SNP-7</b>  | Root1[S <sub>0</sub> ]                     |             | -2150.02469 | -2153.58690 | 15.4 |
|               | Root2[S <sub>NP</sub> ( <sup>1</sup> nπ*)] | -2149.94529 | -2149.94887 | -2153.50767 | 65.1 |
|               | Root3                                      |             | -2149.83663 |             |      |
|               | Root4                                      |             | -2149.83053 |             |      |
|               | Root5                                      |             | -2149.79987 |             |      |
| <b>SNP-8</b>  | Root1[S <sub>0</sub> ]                     |             | -2150.02483 | -2153.58585 | 16.0 |
|               | Root2[S <sub>NP</sub> ( <sup>1</sup> nπ*)] | -2149.93910 | -2149.94311 | -2153.50472 | 66.9 |
|               | Root3                                      |             | -2149.83252 |             |      |
|               | Root4                                      |             | -2149.83035 |             |      |
|               | Root5                                      |             | -2149.79015 |             |      |
| <b>SNP-TS</b> | Root1[S <sub>0</sub> ]                     |             | -2150.01953 | -2153.58241 | 18.2 |
|               | Root2[S <sub>NP</sub> ( <sup>1</sup> nπ*)] | -2149.93334 | -2149.93829 | -2153.50440 | 67.1 |
|               | Root3                                      |             | -2149.82710 |             |      |
|               | Root4                                      |             | -2149.82391 |             |      |
|               | Root5                                      |             | -2149.78913 |             |      |
| <b>SNP-10</b> | Root1[S <sub>0</sub> ]                     |             | -2150.01330 | -2153.57835 | 20.7 |
|               | Root2[S <sub>NP</sub> ( <sup>1</sup> nπ*)] | -2149.92467 | -2149.92920 | -2153.50524 | 66.6 |
|               | Root3                                      |             | -2149.82198 |             |      |
|               | Root4                                      |             | -2149.81553 |             |      |
|               | Root5                                      |             | -2149.78313 |             |      |
| <b>SNP-11</b> | Root1[S <sub>0</sub> ]                     |             | -2150.00103 | -2153.56961 | 26.2 |
|               | Root2[S <sub>NP</sub> ( <sup>1</sup> nπ*)] | -2149.91322 | -2149.91722 | -2153.51167 | 62.6 |
|               | Root3                                      |             | -2149.81545 |             |      |
|               | Root4                                      |             | -2149.80046 |             |      |
|               | Root5                                      |             | -2149.77546 |             |      |
| <b>SNP-12</b> | Root1[S <sub>0</sub> ]                     |             | -2149.98858 | -2153.56049 | 31.9 |
|               | Root2[S <sub>NP</sub> ( <sup>1</sup> nπ*)] | -2149.90745 | -2149.91130 | -2153.51810 | 58.5 |



|                                         |                                                         |             |             |             |      |
|-----------------------------------------|---------------------------------------------------------|-------------|-------------|-------------|------|
|                                         | Root3                                                   |             | -2149.81258 |             |      |
|                                         | Root4                                                   |             | -2149.78747 |             |      |
|                                         | Root5                                                   |             | -2149.77131 |             |      |
| <b>S<sub>NP-13</sub></b>                |                                                         |             |             |             |      |
|                                         | Root1[S <sub>0</sub> ]                                  |             | -2149.94756 | -2153.53962 | 45.0 |
|                                         | Root2[S <sub>NP</sub> ( <sup>1</sup> nπ*)]              | -2149.90578 | -2149.90675 | -2153.52237 | 55.9 |
|                                         | Root3                                                   |             | -2149.81370 |             |      |
|                                         | Root4                                                   |             | -2149.78740 |             |      |
|                                         | Root5                                                   |             | -2149.78188 |             |      |
| <b>CI(S<sub>ΣP</sub>/S<sub>0</sub>)</b> |                                                         |             |             |             |      |
|                                         | Root1[S <sub>0</sub> (σ <sup>2</sup> π <sup>0</sup> )]  |             | -2149.96418 | -2153.53243 | 49.5 |
|                                         | Root2[S <sub>ΣP</sub> (δ <sup>1</sup> π <sup>1</sup> )] | -2149.97398 | -2149.94810 | -2153.52985 | 51.2 |
|                                         | Root3                                                   |             | -2149.84216 |             |      |
|                                         | Root4                                                   |             | -2149.83092 |             |      |
|                                         | Root5                                                   |             | -2149.81613 |             |      |
| <b>S<sub>0-1</sub></b>                  |                                                         |             |             |             |      |
|                                         | Root1[S <sub>0</sub> (σ <sup>2</sup> π <sup>0</sup> )]  | -2149.98203 | -2149.96583 | -2153.53625 | 47.1 |
|                                         | Root2                                                   |             | -2149.94483 | -2153.52995 | 51.1 |
|                                         | Root3                                                   |             | -2149.85661 |             |      |
|                                         | Root4                                                   |             | -2149.83467 |             |      |
|                                         | Root5                                                   |             | -2149.82967 |             |      |
| <b>S<sub>0-2</sub></b>                  |                                                         |             |             |             |      |
|                                         | Root1[S <sub>0</sub> (σ <sup>2</sup> π <sup>0</sup> )]  | -2149.98849 | -2149.97210 | -2153.54193 | 43.6 |
|                                         | Root2                                                   |             | -2149.94055 |             |      |
|                                         | Root3                                                   |             | -2149.85627 |             |      |
|                                         | Root4                                                   |             | -2149.83053 |             |      |
|                                         | Root5                                                   |             | -2149.82966 |             |      |
| <b>S<sub>0-3</sub></b>                  |                                                         |             |             |             |      |
|                                         | Root1[S <sub>0</sub> (σ <sup>2</sup> π <sup>0</sup> )]  | -2149.99545 | -2149.97957 | -2153.54771 | 39.9 |
|                                         | Root2                                                   |             | -2149.93040 |             |      |
|                                         | Root3                                                   |             | -2149.85143 |             |      |
|                                         | Root4                                                   |             | -2149.82648 |             |      |
|                                         | Root5                                                   |             | -2149.81919 |             |      |
| <b>S<sub>0-4</sub></b>                  |                                                         |             |             |             |      |
|                                         | Root1[S <sub>0</sub> (σ <sup>2</sup> π <sup>0</sup> )]  | -2150.00266 | -2149.98698 | -2153.55497 | 35.4 |
|                                         | Root2                                                   |             | -2149.92243 |             |      |
|                                         | Root3                                                   |             | -2149.84528 |             |      |
|                                         | Root4                                                   |             | -2149.82363 |             |      |
|                                         | Root5                                                   |             | -2149.80717 |             |      |

|                                                      |                                           |             |             |              |      |
|------------------------------------------------------|-------------------------------------------|-------------|-------------|--------------|------|
| <b>S<sub>0</sub>-5</b>                               | Root1[S <sub>0</sub> ( $\sigma^2\pi^0$ )] | -2150.00646 | -2149.99028 | -2153.557485 | 33.8 |
|                                                      | Root2                                     |             | -2149.92288 |              |      |
|                                                      | Root3                                     |             | -2149.84639 |              |      |
|                                                      | Root4                                     |             | -2149.82535 |              |      |
|                                                      | Root5                                     |             | -2149.80810 |              |      |
| <b>S<sub>0</sub>-6</b>                               | Root1[S <sub>0</sub> ( $\sigma^2\pi^0$ )] | -2150.01700 | -2153.57611 | -2153.56655  | 30.5 |
|                                                      | Root2                                     |             | -2153.51036 |              |      |
|                                                      | Root3                                     |             | -2153.54692 |              |      |
|                                                      | Root4                                     |             | -2153.44084 |              |      |
|                                                      | Root5                                     |             | -2149.79662 |              |      |
| <b>S<sub>0</sub>-7</b>                               | Root1[S <sub>0</sub> ( $\sigma^2\pi^0$ )] | -2150.01700 | -2150.00432 | -2153.56655  | 28.1 |
|                                                      | Root2                                     |             | -2149.92218 |              |      |
|                                                      | Root3                                     |             | -2149.84788 |              |      |
|                                                      | Root4                                     |             | -2149.81784 |              |      |
|                                                      | Root5                                     |             | -2149.79662 |              |      |
| <b>S<sub>0</sub>-8</b>                               | Root1[S <sub>0</sub> ( $\sigma^2\pi^0$ )] | -2150.01935 | -2150.01165 | -2153.57081  | 25.5 |
|                                                      | Root2                                     |             | -2149.91743 |              |      |
|                                                      | Root3                                     |             | -2149.84672 |              |      |
|                                                      | Root4                                     |             | -2149.81642 |              |      |
|                                                      | Root5                                     |             | -2149.78852 |              |      |
| <b>S<sub>0</sub>-9</b>                               | Root1[S <sub>0</sub> ( $\sigma^2\pi^0$ )] | -2150.02301 | -2150.01322 | -2153.57342  | 23.8 |
|                                                      | Root2                                     |             | -2149.91645 |              |      |
|                                                      | Root3                                     |             | -2149.83928 |              |      |
|                                                      | Root4                                     |             | -2149.82100 |              |      |
|                                                      | Root5                                     |             | -2149.79817 |              |      |
| <b>S<sub>0</sub>(<math>\sigma^2\pi^0</math>)-Min</b> | Root1[S <sub>0</sub> ( $\sigma^2\pi^0$ )] | -2150.03139 | -2150.02382 | -2153.57706  | 21.5 |
|                                                      | Root2                                     |             | -2149.92726 |              |      |
|                                                      | Root3                                     |             | -2149.84962 |              |      |
|                                                      | Root4                                     |             | -2149.81382 |              |      |
|                                                      | Root5                                     |             | -2149.80968 |              |      |
| <b>exo-S<sub>0</sub>-1</b>                           | Root1[S <sub>0</sub> ]                    | -2150.02913 | -2150.01408 | -2153.57478  | 23.0 |
|                                                      | Root2                                     |             | -2149.92327 |              |      |
|                                                      | Root3                                     |             | -2149.84473 |              |      |

|                            |                        |             |             |             |      |
|----------------------------|------------------------|-------------|-------------|-------------|------|
|                            | Root4                  |             | -2149.83571 |             |      |
|                            | Root5                  |             | -2149.81374 |             |      |
|                            |                        |             |             |             |      |
| <i>exo-S<sub>0</sub>-2</i> | Root1[S <sub>0</sub> ] | -2150.02754 | -2150.01270 | -2153.57391 | 23.5 |
|                            | Root2                  |             | -2149.92100 |             |      |
|                            | Root3                  |             | -2149.84368 |             |      |
|                            | Root4                  |             | -2149.83664 |             |      |
|                            | Root5                  |             | -2149.81261 |             |      |
|                            |                        |             |             |             |      |
| <i>exo-S<sub>0</sub>-3</i> | Root1[S <sub>0</sub> ] | -2150.02113 | -2150.00795 | -2153.57191 | 24.8 |
|                            | Root2                  |             | -2149.91235 |             |      |
|                            | Root3                  |             | -2149.84029 |             |      |
|                            | Root4                  |             | -2149.83831 |             |      |
|                            | Root5                  |             | -2149.81030 |             |      |
|                            |                        |             |             |             |      |
| <i>exo-S<sub>0</sub>-4</i> | Root1[S <sub>0</sub> ] | -2150.01520 | -2150.00645 | -2153.57118 | 25.2 |
|                            | Root2                  |             | -2149.90954 |             |      |
|                            | Root3                  |             | -2149.83889 |             |      |
|                            | Root4                  |             | -2149.83822 |             |      |
|                            | Root5                  |             | -2149.80947 |             |      |
|                            |                        |             |             |             |      |
| <i>exo-S<sub>0</sub>-5</i> | Root1[S <sub>0</sub> ] | -2150.01944 | -2150.00267 | -2153.56943 | 26.3 |
|                            | Root2                  |             | -2149.90330 |             |      |
|                            | Root3                  |             | -2149.84008 |             |      |
|                            | Root4                  |             | -2149.83508 |             |      |
|                            | Root5                  |             | -2149.80627 |             |      |
|                            |                        |             |             |             |      |
| <i>exo-S<sub>0</sub>-6</i> | Root1[S <sub>0</sub> ] | -2150.01173 | -2149.99989 | -2153.56833 | 27.0 |
|                            | Root2                  |             | -2149.90009 |             |      |
|                            | Root3                  |             | -2149.84392 |             |      |
|                            | Root4                  |             | -2149.83216 |             |      |
|                            | Root5                  |             | -2149.80317 |             |      |
|                            |                        |             |             |             |      |
| <i>exo-S<sub>0</sub>-7</i> | Root1[S <sub>0</sub> ] | -2150.00574 | -2149.99512 | -2153.56694 | 27.9 |
|                            | Root2                  |             | -2149.89663 |             |      |
|                            | Root3                  |             | -2149.85278 |             |      |
|                            | Root4                  |             | -2149.82764 |             |      |
|                            | Root5                  |             | -2149.79900 |             |      |
|                            |                        |             |             |             |      |

|                             |                        |             |             |             |      |
|-----------------------------|------------------------|-------------|-------------|-------------|------|
| <b>exo-S<sub>0</sub>-TS</b> | Root1[S <sub>0</sub> ] | -2149.99828 | -2149.98992 | -2153.56629 | 28.3 |
|                             | Root2                  |             | -2149.89132 |             |      |
|                             | Root3                  |             | -2149.85690 |             |      |
|                             | Root4                  |             | -2149.82242 |             |      |
|                             | Root5                  |             | -2149.79585 |             |      |
| <b>exo-S<sub>0</sub>-9</b>  | Root1[S <sub>0</sub> ] | -2149.99657 | -2149.99019 | -2153.57034 | 25.7 |
|                             | Root2                  |             | -2149.89268 |             |      |
|                             | Root3                  |             | -2149.85788 |             |      |
|                             | Root4                  |             | -2149.82701 |             |      |
|                             | Root5                  |             | -2149.80177 |             |      |
| <b>exo-S<sub>0</sub>-10</b> | Root1[S <sub>0</sub> ] | -2149.99854 | -2149.99466 | -2153.57756 | 21.2 |
|                             | Root2                  |             | -2149.89605 |             |      |
|                             | Root3                  |             | -2149.85233 |             |      |
|                             | Root4                  |             | -2149.83914 |             |      |
|                             | Root5                  |             | -2149.81695 |             |      |
| <b>exo-S<sub>0</sub>-11</b> | Root1[S <sub>0</sub> ] | -2150.00108 | -2149.99895 | -2153.58219 | 18.3 |
|                             | Root2                  |             | -2149.89906 |             |      |
|                             | Root3                  |             | -2149.84911 |             |      |
|                             | Root4                  |             | -2149.83780 |             |      |
|                             | Root5                  |             | -2149.82189 |             |      |
| <b>exo-S<sub>0</sub>-12</b> | Root1[S <sub>0</sub> ] | -2150.00363 | -2150.00132 | -2153.58453 | 16.8 |
|                             | Root2                  |             | -2149.89874 |             |      |
|                             | Root3                  |             | -2149.85072 |             |      |
|                             | Root4                  |             | -2149.83367 |             |      |
|                             | Root5                  |             | -2149.82387 |             |      |
| <b>exo-S<sub>0</sub>-13</b> | Root1[S <sub>0</sub> ] | -2150.00595 | -2150.00423 | -2153.58654 | 15.6 |
|                             | Root2                  |             | -2149.89872 |             |      |
|                             | Root3                  |             | -2149.85341 |             |      |
|                             | Root4                  |             | -2149.83202 |             |      |
|                             | Root5                  |             | -2149.82413 |             |      |
| <b>exo-S<sub>0</sub>-14</b> | Root1[S <sub>0</sub> ] | -2150.01012 | -2150.00770 | -2153.59144 | 12.5 |
|                             | Root2                  |             | -2149.89243 | -2153.51008 |      |
|                             | Root3                  |             | -2149.85408 |             |      |

|                             |                        |             |             |             |       |
|-----------------------------|------------------------|-------------|-------------|-------------|-------|
|                             | Root4                  |             | -2149.83004 |             |       |
|                             | Root5                  |             | -2149.81628 |             |       |
|                             |                        |             |             |             |       |
| <b>exo-S<sub>0</sub>-15</b> | Root1[S <sub>0</sub> ] | -2150.01644 | -2150.01558 | -2153.59863 | 8.0   |
|                             | Root2                  |             | -2149.89455 |             |       |
|                             | Root3                  |             | -2149.86242 |             |       |
|                             | Root4                  |             | -2149.83667 |             |       |
|                             | Root5                  |             | -2149.80027 |             |       |
|                             |                        |             |             |             |       |
| <b>exo-S<sub>0</sub>-16</b> | Root1[S <sub>0</sub> ] | -2150.02439 | -2150.02312 | -2153.60644 | 3.1   |
|                             | Root2                  |             | -2149.89553 |             |       |
|                             | Root3                  |             | -2149.86771 |             |       |
|                             | Root4                  |             | -2149.84239 |             |       |
|                             | Root5                  |             | -2149.80562 |             |       |
|                             |                        |             |             |             |       |
| <b>exo-S<sub>0</sub>-17</b> | Root1[S <sub>0</sub> ] | -2150.03521 | -2150.03259 | -2153.61668 | -3.3  |
|                             | Root2                  |             | -2149.89117 |             |       |
|                             | Root3                  |             | -2149.86686 |             |       |
|                             | Root4                  |             | -2149.83838 |             |       |
|                             | Root5                  |             | -2149.80369 |             |       |
|                             |                        |             |             |             |       |
| <b>exo-S<sub>0</sub>-18</b> | Root1[S <sub>0</sub> ] | -2150.04401 | -2150.04104 | -2153.62328 | -7.5  |
|                             | Root2                  |             | -2149.86228 |             |       |
|                             | Root3                  |             | -2149.85065 |             |       |
|                             | Root4                  |             | -2149.81485 |             |       |
|                             | Root5                  |             | -2149.78701 |             |       |
|                             |                        |             |             |             |       |
| <b>exo-S<sub>0</sub>-19</b> | Root1[S <sub>0</sub> ] | -2150.05504 | -2150.05118 | -2153.63040 | -11.9 |
|                             | Root2                  |             | -2149.84152 |             |       |
|                             | Root3                  |             | -2149.81514 |             |       |
|                             | Root4                  |             | -2149.77986 |             |       |
|                             | Root5                  |             | -2149.75945 |             |       |
|                             |                        |             |             |             |       |
| <b>exo-S<sub>0</sub>-20</b> | Root1[S <sub>0</sub> ] | -2150.06576 | -2150.06541 | -2153.63930 | -17.5 |
|                             | Root2                  |             | -2149.84639 |             |       |
|                             | Root3                  |             | -2149.78918 |             |       |
|                             | Root4                  |             | -2149.74154 |             |       |
|                             | Root5                  |             | -2149.70691 |             |       |
|                             |                        |             |             |             |       |

|                             |                        |              |             |             |       |
|-----------------------------|------------------------|--------------|-------------|-------------|-------|
| <b>exo-S<sub>0</sub>-21</b> | Root1[S <sub>0</sub> ] | -2150.07307  | -2150.07297 | -2153.64709 | -22.4 |
|                             | Root2                  |              | -2149.85131 |             |       |
|                             | Root3                  |              | -2149.79125 |             |       |
|                             | Root4                  |              | -2149.73864 |             |       |
|                             | Root5                  |              | -2149.71316 |             |       |
| <b>exo-S<sub>0</sub>-22</b> | Root1[S <sub>0</sub> ] | -2150.083917 | -2150.08436 | -2153.65534 | -27.6 |
|                             | Root2                  |              | -2149.86013 |             |       |
|                             | Root3                  |              | -2149.79801 |             |       |
|                             | Root4                  |              | -2149.74614 |             |       |
|                             | Root5                  |              | -2149.72269 |             |       |
| <b>exo-P<sub>3</sub></b>    | Root1[S <sub>0</sub> ] | -2150.087062 | -2150.08718 | -2153.66133 | -31.4 |
|                             | Root2                  |              | -2149.86285 |             |       |
|                             | Root3                  |              | -2149.80094 |             |       |
|                             | Root4                  |              | -2149.74898 |             |       |
|                             | Root5                  |              | -2149.72479 |             |       |

**Table S7.** Absolute energies (A.E., Hartree) and relative energies (R.E., kcal/mol) for the optimized structures of **3** along the pathways for photogeneration of siloxy carbene mediated by T<sub>NP</sub>(<sup>3</sup>nπ\*) state and the intramolecular [2+1] cycloaddition obtained by CASPT2//CASSCF/PCM calculations. The corresponding energy profile is plotted in Fig. 3b.

| <b>3</b>                 |                                            | <b>CASSCF</b> | <b>RASSCF</b> | <b>CASPT2</b> |             |
|--------------------------|--------------------------------------------|---------------|---------------|---------------|-------------|
|                          |                                            | <b>A.E.</b>   | <b>A.E.</b>   | <b>A.E.</b>   | <b>R.E.</b> |
| <b>S<sub>0</sub>-Min</b> | Root1[S <sub>0</sub> ]                     | -2149.94818   | -2150.05847   | -2153.61137   | 0.0         |
|                          | Root2[S <sub>NP</sub> ( <sup>1</sup> nπ*)] |               | -2149.92975   | -2153.50001   | 69.9        |
|                          | Root3[S <sub>PP</sub> ( <sup>1</sup> ππ*)] |               | -2149.83928   | -2153.45876   | 95.8        |
|                          | Root4                                      |               | -2149.81428   | -2153.42890   |             |
|                          | Root5                                      |               | -2149.77968   | -2153.40464   |             |
| <b>S<sub>NP</sub>-1</b>  | Root1[S <sub>0</sub> ]                     |               | -2150.05639   | -2153.61037   | 0.6         |
|                          | Root2[S <sub>NP</sub> ( <sup>1</sup> nπ*)] | -2149.93547   | -2149.93860   | -2153.50363   | 67.6        |
|                          | Root3                                      |               | -2149.84001   |               |             |
|                          | Root4                                      |               | -2149.82056   |               |             |
|                          | Root5                                      |               | -2149.78589   |               |             |
| <b>S<sub>NP</sub>-2</b>  | Root1[S <sub>0</sub> ]                     |               | -2150.03278   | -2153.59376   | 11.0        |

|                                                                   |                             |             |             |             |      |
|-------------------------------------------------------------------|-----------------------------|-------------|-------------|-------------|------|
|                                                                   | Root2[ $S_{NP}(^1n\pi^*)$ ] | -2149.94808 | -2149.95098 | -2153.50812 | 64.8 |
|                                                                   | Root3                       |             | -2149.83730 |             |      |
|                                                                   | Root4                       |             | -2149.82403 |             |      |
|                                                                   | Root5                       |             | -2149.80345 |             |      |
|                                                                   |                             |             |             |             |      |
| <b>S<sub>NP</sub>-3</b>                                           | Root1[ $S_0$ ]              |             | -2150.03148 | -2153.59236 | 11.9 |
|                                                                   | Root2[ $S_{NP}(^1n\pi^*)$ ] | -2149.94862 | -2149.95152 | -2153.50846 | 64.6 |
|                                                                   | Root3                       |             | -2149.83768 |             |      |
|                                                                   | Root4                       |             | -2149.82471 |             |      |
|                                                                   | Root5                       |             | -2149.80388 |             |      |
|                                                                   |                             |             |             |             |      |
| <b>S<sub>NP</sub>-4</b>                                           | Root1[ $S_0$ ]              |             | -2150.03066 | -2153.59274 | 11.7 |
|                                                                   | Root2[ $S_{NP}(^1n\pi^*)$ ] | -2149.94916 | -2149.95207 | -2153.51012 | 63.5 |
|                                                                   | Root3                       |             | -2149.83860 |             |      |
|                                                                   | Root4                       |             | -2149.82654 |             |      |
|                                                                   | Root5                       |             | -2149.80405 |             |      |
|                                                                   |                             |             |             |             |      |
| <b>S<sub>NP</sub>-Min/<br/>STC(S<sub>NP</sub>/T<sub>NP</sub>)</b> | Root1[ $S_0$ ]              |             | -2150.03287 | -2153.59320 | 11.4 |
|                                                                   | Root2[ $S_{NP}(^1n\pi^*)$ ] | -2149.94819 | -2149.95309 | -2153.51076 | 63.1 |
|                                                                   | Root3                       |             | -2149.83894 |             |      |
|                                                                   | Root4                       |             | -2149.83197 |             |      |
|                                                                   | Root5                       |             | -2149.79791 |             |      |
|                                                                   | Root1[ $T_{NP}(^3n\pi^*)$ ] |             | -2149.96020 | -2153.51991 | 57.4 |
|                                                                   | Root2                       |             | -2149.92818 |             |      |
|                                                                   | Root3                       |             | -2149.87926 |             |      |
|                                                                   | Root4                       |             | -2149.84867 |             |      |
|                                                                   | Root5                       |             | -2149.83902 |             |      |
|                                                                   |                             |             |             |             |      |
| <b>T<sub>NP</sub>-1</b>                                           | Root1[ $T_{NP}(^3n\pi^*)$ ] | -2149.96340 | -2149.95594 | -2153.52232 | 55.9 |
|                                                                   | Root2                       |             | -2149.92320 |             |      |
|                                                                   | Root3                       |             | -2149.88201 |             |      |
|                                                                   | Root4                       |             | -2149.88027 |             |      |
|                                                                   | Root5                       |             | -2149.85030 |             |      |
|                                                                   |                             |             |             |             |      |
| <b>T<sub>NP</sub>-Min</b>                                         | Root1[ $T_{NP}(^3n\pi^*)$ ] | -2149.96489 | -2149.95666 | -2153.52270 | 55.6 |
|                                                                   | Root2                       |             | -2149.92063 |             |      |
|                                                                   | Root3                       |             | -2149.88657 |             |      |
|                                                                   | Root4                       |             | -2149.88469 |             |      |
|                                                                   | Root5                       |             | -2149.85321 |             |      |

|                          |                                            |             |             |             |      |
|--------------------------|--------------------------------------------|-------------|-------------|-------------|------|
| <b>T<sub>NP-3</sub></b>  | Root1[T <sub>NP</sub> ( <sup>3</sup> nπ*)] | -2149.95418 | -2149.94628 | -2153.51926 | 57.8 |
|                          | Root2                                      |             | -2149.90987 |             |      |
|                          | Root3                                      |             | -2149.87364 |             |      |
|                          | Root4                                      |             | -2149.87062 |             |      |
|                          | Root5                                      |             | -2149.84246 |             |      |
| <b>T<sub>NP-TS</sub></b> | Root1[T <sub>NP</sub> ( <sup>3</sup> nπ*)] | -2149.95731 | -2149.94978 | -2153.51886 | 58.0 |
|                          | Root2                                      |             | -2149.91607 |             |      |
|                          | Root3                                      |             | -2149.87629 |             |      |
|                          | Root4                                      |             | -2149.87371 |             |      |
|                          | Root5                                      |             | -2149.84563 |             |      |
| <b>T<sub>NP-5</sub></b>  | Root1[T <sub>NP</sub> ( <sup>3</sup> nπ*)] | -2149.94803 | -2149.94026 | -2153.52198 | 56.1 |
|                          | Root2                                      |             | -2149.89817 |             |      |
|                          | Root3                                      |             | -2149.86833 |             |      |
|                          | Root4                                      |             | -2149.86268 |             |      |
|                          | Root5                                      |             | -2149.83530 |             |      |
| <b>T<sub>NP-6</sub></b>  | Root1[T <sub>NP</sub> ( <sup>3</sup> nπ*)] | -2149.94319 | -2149.93548 | -2153.52687 | 53.0 |
|                          | Root2                                      |             | -2149.88700 |             |      |
|                          | Root3                                      |             | -2149.86285 |             |      |
|                          | Root4                                      |             | -2149.85289 |             |      |
|                          | Root5                                      |             | -2149.82771 |             |      |
| <b>T<sub>NP-7</sub></b>  | Root1[T <sub>NP</sub> ( <sup>3</sup> nπ*)] | 2149.94010  | -2149.93229 | -2153.53186 | 49.9 |
|                          | Root2                                      |             | -2149.87774 |             |      |
|                          | Root3                                      |             | -2149.85754 |             |      |
|                          | Root4                                      |             | -2149.84297 |             |      |
|                          | Root5                                      |             | -2149.82040 |             |      |
| <b>T<sub>NP-8</sub></b>  | Root1[T <sub>NP</sub> ( <sup>3</sup> nπ*)] | -2149.93733 | -2149.93210 | -2153.53830 | 45.8 |
|                          | Root2                                      |             | -2149.85894 |             |      |
|                          | Root3                                      |             | -2149.84067 |             |      |
|                          | Root4                                      |             | -2149.81862 |             |      |
|                          | Root5                                      |             | -2149.81130 |             |      |
| <b>T<sub>NP-9</sub></b>  | Root1[T <sub>NP</sub> ( <sup>3</sup> nπ*)] | -2149.96941 | -2149.93221 | -2153.54003 | 44.8 |
|                          | Root2                                      |             | -2149.83788 |             |      |



|                                                       |                                                         |             |             |             |      |
|-------------------------------------------------------|---------------------------------------------------------|-------------|-------------|-------------|------|
|                                                       | Root3                                                   |             | -2149.82153 |             |      |
|                                                       | Root4                                                   |             | -2149.80997 |             |      |
|                                                       | Root5                                                   |             | -2149.79302 |             |      |
|                                                       |                                                         |             |             |             |      |
| <b>T<sub>NP-10</sub></b>                              | Root1[T <sub>NP</sub> ( <sup>3</sup> nπ*)]              | -2149.93967 | -2149.97501 | -2153.54537 | 41.4 |
|                                                       | Root2                                                   |             | -2149.85199 |             |      |
|                                                       | Root3                                                   |             | -2149.82653 |             |      |
|                                                       | Root4                                                   |             | -2149.80828 |             |      |
|                                                       | Root5                                                   |             | -2149.80633 |             |      |
|                                                       |                                                         |             |             |             |      |
| <b>T<sub>NP-11</sub></b>                              | Root1[T <sub>NP</sub> ( <sup>3</sup> nπ*)]              | -2149.98421 | -2149.98126 | -2153.54818 | 39.6 |
|                                                       | Root2                                                   |             | -2149.85716 |             |      |
|                                                       | Root3                                                   |             | -2149.83278 |             |      |
|                                                       | Root4                                                   |             | -2149.81404 |             |      |
|                                                       | Root5                                                   |             | -2149.81197 |             |      |
|                                                       |                                                         |             |             |             |      |
| <b>T<sub>NP-12</sub></b>                              | Root1[T <sub>NP</sub> ( <sup>3</sup> nπ*)]              | -2149.99544 | -2149.99477 | -2153.55688 | 34.2 |
|                                                       | Root2                                                   |             | -2149.86573 |             |      |
|                                                       | Root3                                                   |             | -2149.84613 |             |      |
|                                                       | Root4                                                   |             | -2149.84216 |             |      |
|                                                       | Root5                                                   |             | -2149.81812 |             |      |
|                                                       |                                                         |             |             |             |      |
| <b>T<sub>ΣP</sub>(σ<sup>1</sup>π<sup>1</sup>)-Min</b> | Root1[T <sub>ΣP</sub> (σ <sup>1</sup> π <sup>1</sup> )] | -2150.00620 | -2150.00243 | -2153.56417 | 29.6 |
|                                                       | Root2                                                   |             | -2149.87761 |             |      |
|                                                       | Root3                                                   |             | -2149.85319 |             |      |
|                                                       | Root4                                                   |             | -2149.84899 |             |      |
|                                                       | Root5                                                   |             | -2149.84265 |             |      |
|                                                       |                                                         |             |             |             |      |
| <b>CYC-T<sub>1</sub>-1</b>                            | Root1[T <sub>1</sub> ]                                  | -2150.00367 | -2150.00421 | -2153.56340 | 30.1 |
|                                                       | Root2                                                   |             | -2149.87787 |             |      |
|                                                       | Root3                                                   |             | -2149.85692 |             |      |
|                                                       | Root4                                                   |             | -2149.83711 |             |      |
|                                                       | Root5                                                   |             | -2149.83529 |             |      |
|                                                       |                                                         |             |             |             |      |
| <b>CYC-T<sub>1</sub>-2</b>                            | Root1[T <sub>1</sub> ]                                  | -2149.99946 | -2149.99929 | -2153.55992 | 32.3 |
|                                                       | Root2                                                   |             | -2149.87052 |             |      |
|                                                       | Root3                                                   |             | -2149.86157 |             |      |
|                                                       | Root4                                                   |             | -2149.83368 |             |      |
|                                                       | Root5                                                   |             | -2149.83234 |             |      |

|                                                 |                        |             |             |             |      |
|-------------------------------------------------|------------------------|-------------|-------------|-------------|------|
| <b>CYC-T<sub>1</sub>-3</b>                      | Root1[T <sub>1</sub> ] | -2149.99558 | -2149.99556 | -2153.55723 | 34.0 |
|                                                 | Root2                  |             | -2149.86744 |             |      |
|                                                 | Root3                  |             | -2149.86161 |             |      |
|                                                 | Root4                  |             | -2149.83013 |             |      |
|                                                 | Root5                  |             | -2149.82783 |             |      |
| <b>CYC-T<sub>1</sub>-4</b>                      | Root1[T <sub>1</sub> ] | -2149.99286 | -2149.99299 | -2153.55593 | 34.8 |
|                                                 | Root2                  |             | -2149.86535 |             |      |
|                                                 | Root3                  |             | -2149.86254 |             |      |
|                                                 | Root4                  |             | -2149.82784 |             |      |
|                                                 | Root5                  |             | -2149.82425 |             |      |
| <b>CYC-T<sub>1</sub>-5</b>                      | Root1[T <sub>1</sub> ] | -2149.98731 | -2149.98772 | -2153.55469 | 35.6 |
|                                                 | Root2                  |             | -2149.86979 |             |      |
|                                                 | Root3                  |             | -2149.86013 |             |      |
|                                                 | Root4                  |             | -2149.82362 |             |      |
|                                                 | Root5                  |             | -2149.82267 |             |      |
| <b>CYC-T<sub>1</sub>-6<br/>T<sub>1</sub>-TS</b> | Root1[T <sub>1</sub> ] | -2149.98344 | -2149.98424 | -2153.55372 | 36.2 |
|                                                 | Root2                  |             | -2149.87448 |             |      |
|                                                 | Root3                  |             | -2149.85746 |             |      |
|                                                 | Root4                  |             | -2149.82416 |             |      |
|                                                 | Root5                  |             | -2149.82119 |             |      |
| <b>CYC-T<sub>1</sub>-7</b>                      | Root1[T <sub>1</sub> ] | -2149.98473 | -2149.98752 | -2153.55669 | 34.3 |
|                                                 | Root2                  |             | -2149.87021 |             |      |
|                                                 | Root3                  |             | -2149.86124 |             |      |
|                                                 | Root4                  |             | -2149.82922 |             |      |
|                                                 | Root5                  |             | -2149.82235 |             |      |
| <b>CYC-T<sub>1</sub>-8</b>                      | Root1[T <sub>1</sub> ] | -2149.98692 | -2149.98972 | -2153.55894 | 32.9 |
|                                                 | Root2                  |             | -2149.87274 |             |      |
|                                                 | Root3                  |             | -2149.85505 |             |      |
|                                                 | Root4                  |             | -2149.83186 |             |      |
|                                                 | Root5                  |             | -2149.82534 |             |      |
| <b>CYC-T<sub>1</sub>-9</b>                      | Root1[T <sub>1</sub> ] | -2149.98934 | -2149.99488 | -2153.56380 | 29.8 |
|                                                 | Root2                  |             | -2149.87812 |             |      |

|                             |                        |             |             |             |      |
|-----------------------------|------------------------|-------------|-------------|-------------|------|
|                             | Root3                  |             | -2149.84106 |             |      |
|                             | Root4                  |             | -2149.83728 |             |      |
|                             | Root5                  |             | -2149.82892 |             |      |
|                             |                        |             |             |             |      |
| <b>CYC-T<sub>1</sub>-10</b> | Root1[T <sub>1</sub> ] | -2149.99208 | -2150.00009 | -2153.56886 | 26.7 |
|                             | Root2                  |             | -2149.88325 |             |      |
|                             | Root3                  |             | -2149.84439 |             |      |
|                             | Root4                  |             | -2149.84025 |             |      |
|                             | Root5                  |             | -2149.81253 |             |      |
|                             |                        |             |             |             |      |
| <b>CYC-T<sub>1</sub>-11</b> | Root1[T <sub>1</sub> ] | -2150.00293 | -2150.00619 | -2153.57194 | 24.7 |
|                             | Root2                  |             | -2149.88970 |             |      |
|                             | Root3                  |             | -2149.85020 |             |      |
|                             | Root4                  |             | -2149.84518 |             |      |
|                             | Root5                  |             | -2149.80417 |             |      |
|                             |                        |             |             |             |      |
| <b>CYC-T<sub>1</sub>-12</b> | Root1[T <sub>1</sub> ] | -2150.00970 | -2150.01300 | -2153.57870 | 20.5 |
|                             | Root2                  |             | -2149.89551 |             |      |
|                             | Root3                  |             | -2149.85766 |             |      |
|                             | Root4                  |             | -2149.85166 |             |      |
|                             | Root5                  |             | -2149.81091 |             |      |
|                             |                        |             |             |             |      |
| <b>CYC-T<sub>1</sub>-13</b> | Root1[T <sub>1</sub> ] | -2150.01534 | -2150.01835 | -2153.58482 | 16.7 |
|                             | Root2                  |             | -2149.89987 |             |      |
|                             | Root3                  |             | -2149.86395 |             |      |
|                             | Root4                  |             | -2149.85660 |             |      |
|                             | Root5                  |             | -2149.81619 |             |      |
|                             |                        |             |             |             |      |
| <b>CYC-T<sub>1</sub>-14</b> | Root1[T <sub>1</sub> ] | -2150.02271 | -2150.02565 | -2153.59410 | 10.8 |
|                             | Root2                  |             | -2149.90539 |             |      |
|                             | Root3                  |             | -2149.87270 |             |      |
|                             | Root4                  |             | -2149.86247 |             |      |
|                             | Root5                  |             | -2149.82425 |             |      |
|                             |                        |             |             |             |      |
| <b>CYC-T<sub>1</sub>-15</b> | Root1[T <sub>1</sub> ] | -2150.02607 | -2150.02855 | -2153.59774 | 8.5  |
|                             | Root2                  |             | -2149.90826 |             |      |
|                             | Root3                  |             | -2149.87557 |             |      |
|                             | Root4                  |             | -2149.86438 |             |      |
|                             | Root5                  |             | -2149.82727 |             |      |

|                                                                                                           |                        |             |             |             |      |
|-----------------------------------------------------------------------------------------------------------|------------------------|-------------|-------------|-------------|------|
| <b>CYC-T<sub>1</sub>-16</b>                                                                               | Root1[T <sub>1</sub> ] | -2150.02719 | -2150.02967 | -2153.59926 | 7.6  |
|                                                                                                           | Root2                  |             | -2149.90948 |             |      |
|                                                                                                           | Root3                  |             | -2149.87689 |             |      |
|                                                                                                           | Root4                  |             | -2149.86501 |             |      |
|                                                                                                           | Root5                  |             | -2149.82850 |             |      |
| <b>CYC-T<sub>1</sub>-17</b>                                                                               | Root1[T <sub>1</sub> ] | -2150.02853 | -2150.03028 | -2153.59993 | 7.2  |
|                                                                                                           | Root2                  |             | -2149.91017 |             |      |
|                                                                                                           | Root3                  |             | -2149.87759 |             |      |
|                                                                                                           | Root4                  |             | -2149.86568 |             |      |
|                                                                                                           | Root5                  |             | -2149.82918 |             |      |
| <b>STC(T<sub>1</sub>/S<sub>0</sub>)</b>                                                                   | Root1[T <sub>1</sub> ] | -2150.02860 | -2150.03141 | -2153.60108 | 6.5  |
|                                                                                                           | Root2                  |             | -2149.91141 |             |      |
|                                                                                                           | Root3                  |             | -2149.87863 |             |      |
|                                                                                                           | Root4                  |             | -2149.86710 |             |      |
|                                                                                                           | Root5                  |             | -2149.83040 |             |      |
|                                                                                                           | Root1[S <sub>0</sub> ] |             | -2150.02936 | -2153.60656 | 3.0  |
|                                                                                                           | Root2                  |             | -2149.92713 |             |      |
|                                                                                                           | Root3                  |             | -2149.89364 |             |      |
|                                                                                                           | Root4                  |             | -2149.87739 |             |      |
|                                                                                                           | Root5                  |             | -2149.82593 |             |      |
| <b>The pathway of <i>exo</i>-cyclopropane formation after STC(T<sub>1</sub>/S<sub>0</sub>) in Fig. 3b</b> |                        |             |             |             |      |
| <b><i>exo</i>-S<sub>0</sub>-1</b>                                                                         | Root1[S <sub>0</sub> ] | -2150.03209 | -2150.03064 | -2153.60794 | 2.1  |
|                                                                                                           | Root2                  |             | -2149.92719 |             |      |
|                                                                                                           | Root3                  |             | -2149.89252 |             |      |
|                                                                                                           | Root4                  |             | -2149.87737 |             |      |
|                                                                                                           | Root5                  |             | -2149.82487 |             |      |
| <b><i>exo</i>-S<sub>0</sub>-2</b>                                                                         | Root1[S <sub>0</sub> ] | -2150.03440 | -2150.03233 | -2153.61132 | 0.0  |
|                                                                                                           | Root2                  |             | -2149.92480 |             |      |
|                                                                                                           | Root3                  |             | -2149.88803 |             |      |
|                                                                                                           | Root4                  |             | -2149.87106 |             |      |
|                                                                                                           | Root5                  |             | -2149.81899 |             |      |
| <b><i>exo</i>-S<sub>0</sub>-3</b>                                                                         | Root1[S <sub>0</sub> ] | 2150.03904  | -2150.03503 | -2153.61648 | -3.2 |
|                                                                                                           | Root2                  |             | -2149.89666 |             |      |
|                                                                                                           | Root3                  |             | -2149.86887 |             |      |

|                                                                                                                |                        |              |             |             |       |
|----------------------------------------------------------------------------------------------------------------|------------------------|--------------|-------------|-------------|-------|
|                                                                                                                | Root4                  |              | -2149.83968 |             |       |
|                                                                                                                | Root5                  |              | -2149.81022 |             |       |
|                                                                                                                |                        |              |             |             |       |
| <i>exo-S<sub>0</sub>-4</i>                                                                                     | Root1[S <sub>0</sub> ] | -2150.04971  | -2150.04363 | -2153.62186 | -6.6  |
|                                                                                                                | Root2                  |              | -2149.83948 |             |       |
|                                                                                                                | Root3                  |              | -2149.82518 |             |       |
|                                                                                                                | Root4                  |              | -2149.78745 |             |       |
|                                                                                                                | Root5                  |              | -2149.76456 |             |       |
|                                                                                                                |                        |              |             |             |       |
| <i>exo-S<sub>0</sub>-5</i>                                                                                     | Root1[S <sub>0</sub> ] | -2150.06039  | -2150.05852 | -2153.63208 | -13.0 |
|                                                                                                                | Root2                  |              | -2149.84128 |             |       |
|                                                                                                                | Root3                  |              | -2149.78581 |             |       |
|                                                                                                                | Root4                  |              | -2149.73673 |             |       |
|                                                                                                                | Root5                  |              | -2149.70235 |             |       |
|                                                                                                                |                        |              |             |             |       |
| <i>exo-S<sub>0</sub>-6</i>                                                                                     | Root1[S <sub>0</sub> ] | -2150.06837  | -2150.06661 | -2153.64052 | -18.3 |
|                                                                                                                | Root2                  |              | -2149.84692 |             |       |
|                                                                                                                | Root3                  |              | -2149.78866 |             |       |
|                                                                                                                | Root4                  |              | -2149.73598 |             |       |
|                                                                                                                | Root5                  |              | -2149.70898 |             |       |
|                                                                                                                |                        |              |             |             |       |
| <i>exo-S<sub>0</sub>-7</i>                                                                                     | Root1[S <sub>0</sub> ] | -2150.07301  | -2150.07259 | -2153.64677 | -22.2 |
|                                                                                                                | Root2                  |              | -2149.85141 |             |       |
|                                                                                                                | Root3                  |              | -2149.79254 |             |       |
|                                                                                                                | Root4                  |              | -2149.73913 |             |       |
|                                                                                                                | Root5                  |              | -2149.71432 |             |       |
|                                                                                                                |                        |              |             |             |       |
| <i>exo-S<sub>0</sub>-8</i>                                                                                     | Root1[S <sub>0</sub> ] | -2150.08561  | -2150.08382 | -2153.65926 | -30.0 |
|                                                                                                                | Root2                  |              | -2149.85930 |             |       |
|                                                                                                                | Root3                  |              | -2149.79677 |             |       |
|                                                                                                                | Root4                  |              | -2149.74380 |             |       |
|                                                                                                                | Root5                  |              | -2149.72129 |             |       |
|                                                                                                                |                        |              |             |             |       |
| <i>exo-P3</i>                                                                                                  | Root1[S <sub>0</sub> ] | -2150.087062 | -2150.08718 | -2153.66133 | -31.4 |
|                                                                                                                | Root2                  |              | -2149.86285 |             |       |
|                                                                                                                | Root3                  |              | -2149.80094 |             |       |
|                                                                                                                | Root4                  |              | -2149.74898 |             |       |
|                                                                                                                | Root5                  |              | -2149.72479 |             |       |
| <b>The pathway of <i>endo</i>-cyclopropane formation after the STC(T<sub>1</sub>/S<sub>0</sub>) in Fig. 3b</b> |                        |              |             |             |       |

|                                         |                        |             |             |             |      |
|-----------------------------------------|------------------------|-------------|-------------|-------------|------|
| <b>STC(T<sub>1</sub>/S<sub>0</sub>)</b> | Root1[T <sub>1</sub> ] | -2150.02860 | -2150.03141 | -2153.60108 | 6.5  |
|                                         | Root2                  |             | -2149.91141 |             |      |
|                                         | Root3                  |             | -2149.87863 |             |      |
|                                         | Root4                  |             | -2149.86710 |             |      |
|                                         | Root5                  |             | -2149.83040 |             |      |
|                                         | Root1[S <sub>0</sub> ] |             | -2150.02936 | -2153.60656 | 3.0  |
|                                         | Root2                  |             | -2149.92713 |             |      |
|                                         | Root3                  |             | -2149.89364 |             |      |
|                                         | Root4                  |             | -2149.87739 |             |      |
|                                         | Root5                  |             | -2149.82593 |             |      |
| <b>endo-S<sub>0</sub>-1</b>             | Root1[S <sub>0</sub> ] | -2150.03229 | -2150.00735 | -2153.60389 | 4.7  |
|                                         | Root2                  |             | -2149.94293 |             |      |
|                                         | Root3                  |             | -2149.86896 |             |      |
|                                         | Root4                  |             | -2149.83431 |             |      |
|                                         | Root5                  |             | -2149.79909 |             |      |
| <b>endo-S<sub>0</sub>-2</b>             | Root1[S <sub>0</sub> ] | -2150.02225 | -2150.00229 | -2153.60312 | 5.2  |
|                                         | Root2                  |             | -2149.94162 | -2153.56268 |      |
|                                         | Root3                  |             | -2149.86517 |             |      |
|                                         | Root4                  |             | -2149.82965 |             |      |
|                                         | Root5                  |             | -2149.79364 |             |      |
| <b>endo-S<sub>0</sub>-3</b>             | Root1[S <sub>0</sub> ] | -2150.02043 | -2149.98994 | -2153.59434 | 10.7 |
|                                         | Root2                  |             | -2149.94953 |             |      |
|                                         | Root3                  |             | -2149.84708 |             |      |
|                                         | Root4                  |             | -2149.81060 |             |      |
|                                         | Root5                  |             | -2149.79727 |             |      |
| <b>endo-S<sub>0</sub>-4</b>             | Root1[S <sub>0</sub> ] | -2150.02259 | -2149.98826 | -2153.59200 | 12.2 |
|                                         | Root2                  |             | -2149.95162 |             |      |
|                                         | Root3                  |             | -2149.84341 |             |      |
|                                         | Root4                  |             | -2149.80625 |             |      |
|                                         | Root5                  |             | -2149.80047 |             |      |
| <b>endo-S<sub>0</sub>-5</b>             | Root1[S <sub>0</sub> ] | -2150.02536 | -2149.98437 | -2153.58842 | 14.4 |
|                                         | Root2                  |             | -2149.94545 |             |      |
|                                         | Root3                  |             | -2149.83533 |             |      |
|                                         | Root4                  |             | -2149.79825 |             |      |

|                              |                        |             |             |             |      |
|------------------------------|------------------------|-------------|-------------|-------------|------|
|                              | Root5                  |             | -2149.79714 |             |      |
| <i>endo-S<sub>0</sub>-TS</i> | Root1[S <sub>0</sub> ] | -2150.02740 | -2149.99126 | -2153.58574 | 16.1 |
|                              | Root2                  |             | -2149.94873 |             |      |
|                              | Root3                  |             | -2149.83836 |             |      |
|                              | Root4                  |             | -2149.80408 |             |      |
|                              | Root5                  |             | -2149.8002  |             |      |
| <i>endo-S<sub>0</sub>-7</i>  | Root1[S <sub>0</sub> ] | -2150.03084 | -2149.99440 | -2153.59253 | 11.8 |
|                              | Root2                  |             | -2149.94829 |             |      |
|                              | Root3                  |             | -2149.83755 |             |      |
|                              | Root4                  |             | -2149.80587 |             |      |
|                              | Root5                  |             | -2149.79845 |             |      |
| <i>endo-S<sub>0</sub>-8</i>  | Root1[S <sub>0</sub> ] | -2150.02250 | -2149.99803 | -2153.59651 | 9.3  |
|                              | Root2                  |             | -2149.95715 |             |      |
|                              | Root3                  |             | -2149.84496 |             |      |
|                              | Root4                  |             | -2149.81182 |             |      |
|                              | Root5                  |             | -2149.80552 |             |      |
| <i>endo-S<sub>0</sub>-9</i>  | Root1[S <sub>0</sub> ] | -2150.02250 | -2149.99902 | -2153.60331 | 5.1  |
|                              | Root2                  |             | -2149.96134 |             |      |
|                              | Root3                  |             | -2149.85173 |             |      |
|                              | Root4                  |             | -2149.81554 |             |      |
|                              | Root5                  |             | -2149.81372 |             |      |
| <i>endo-S<sub>0</sub>-10</i> | Root1[S <sub>0</sub> ] | -2150.02713 | -2150.02538 | -2153.60564 | 3.6  |
|                              | Root2                  |             | -2149.92126 |             |      |
|                              | Root3                  |             | -2149.88378 |             |      |
|                              | Root4                  |             | -2149.86577 |             |      |
|                              | Root5                  |             | -2149.81485 |             |      |
| <i>endo-S<sub>0</sub>-11</i> | Root1[S <sub>0</sub> ] | -2150.03576 | -2150.03197 | -2153.61328 | -1.2 |
|                              | Root2                  |             | -2149.85301 |             |      |
|                              | Root3                  |             | -2149.84187 |             |      |
|                              | Root4                  |             | -2149.80328 |             |      |
|                              | Root5                  |             | -2149.78191 |             |      |
| <i>endo-S<sub>0</sub>-12</i> | Root1[S <sub>0</sub> ] | -2150.05083 | -2150.04553 | -2153.62564 | -9.0 |

|                              |                        |              |             |             |       |
|------------------------------|------------------------|--------------|-------------|-------------|-------|
|                              | Root2                  |              | -2149.82959 |             |       |
|                              | Root3                  |              | -2149.78637 |             |       |
|                              | Root4                  |              | -2149.74524 |             |       |
|                              | Root5                  |              | -2149.73137 |             |       |
| <b>endo-S<sub>0</sub>-13</b> |                        |              |             |             |       |
|                              | Root1[S <sub>0</sub> ] | -2150.06236  | -2150.06199 | -2153.63492 | -14.8 |
|                              | Root2                  |              | -2149.84160 |             |       |
|                              | Root3                  |              | -2149.78210 |             |       |
|                              | Root4                  |              | -2149.73135 |             |       |
|                              | Root5                  |              | -2149.70338 |             |       |
| <b>endo-S<sub>0</sub>-14</b> |                        |              |             |             |       |
|                              | Root1[S <sub>0</sub> ] | -2150.06756  | -2150.06728 | -2153.64031 | -18.2 |
|                              | Root2                  |              | -2149.84497 |             |       |
|                              | Root3                  |              | -2149.78507 |             |       |
|                              | Root4                  |              | -2149.73330 |             |       |
|                              | Root5                  |              | -2149.70754 |             |       |
| <b>endo-S<sub>0</sub>-15</b> |                        |              |             |             |       |
|                              | Root1[S <sub>0</sub> ] | -2150.074189 | -2150.07301 | -2153.64460 | -20.9 |
|                              | Root2                  |              | -2149.84911 |             |       |
|                              | Root3                  |              | -2149.78710 |             |       |
|                              | Root4                  |              | -2149.73393 |             |       |
|                              | Root5                  |              | -2149.71236 |             |       |
| <b>endo-S<sub>0</sub>-16</b> |                        |              |             |             |       |
|                              | Root1[S <sub>0</sub> ] | -2150.07917  | -2150.08043 | -2153.65652 | -28.3 |
|                              | Root2                  |              | -2149.85637 |             |       |
|                              | Root3                  |              | -2149.79259 |             |       |
|                              | Root4                  |              | -2149.74054 |             |       |
|                              | Root5                  |              | -2149.71665 |             |       |
| <b>endo-S<sub>0</sub>-17</b> |                        |              |             |             |       |
|                              | Root1[S <sub>0</sub> ] | -2150.08098  | -2150.08074 | -2153.65803 | -29.3 |
|                              | Root2                  |              | -2149.85690 |             |       |
|                              | Root3                  |              | -2149.79354 |             |       |
|                              | Root4                  |              | -2149.74153 |             |       |
|                              | Root5                  |              | -2149.71846 |             |       |
| <b>endo-P3</b>               |                        |              |             |             |       |
|                              | Root1[S <sub>0</sub> ] | -2150.081645 | -2150.08078 | -2153.65908 | -29.9 |
|                              | Root2                  |              | -2149.85621 |             |       |
|                              | Root3                  |              | -2149.79241 |             |       |
|                              | Root4                  |              | -2149.74057 |             |       |



|  |       |  |             |  |  |
|--|-------|--|-------------|--|--|
|  | Root5 |  | -2149.71796 |  |  |
|--|-------|--|-------------|--|--|

## 7. Cartesian Coordinates

7.1 The minima of **1–4** in the ground-state obtained at the CASPT2//CASSCF/PCM level of theory.

| <b>1</b> |              |              |              | <b>2</b> |              |              |              |
|----------|--------------|--------------|--------------|----------|--------------|--------------|--------------|
| 6        | -3.221651750 | -0.146581420 | 0.532267830  | 6        | -0.033127004 | 2.179046166  | 2.526477192  |
| 6        | -1.891899130 | 0.224089390  | 0.546688840  | 6        | -0.744077056 | 0.818538063  | 2.615778203  |
| 6        | -2.500845010 | 2.466092390  | -0.003773030 | 6        | -1.791534138 | 0.523406042  | 1.525774116  |
| 6        | -3.833636040 | 2.106563010  | -0.015281150 | 6        | 0.885136067  | 2.425011186  | 1.334921102  |
| 6        | -4.206847520 | 0.792732700  | 0.245149070  | 8        | 0.556325042  | 3.270882253  | 0.516956038  |
| 1        | -3.493704340 | -1.163631610 | 0.747572940  | 14       | 2.665277204  | 1.662805126  | 1.102042086  |
| 1        | -1.139561410 | -0.509852860 | 0.775301530  | 6        | 2.899594223  | 1.453060114  | -0.758319057 |
| 1        | -2.225270170 | 3.486119370  | -0.205311480 | 6        | 3.888013302  | 4.244879326  | 1.019510078  |
| 1        | -4.583012920 | 2.846733080  | -0.228365810 | 6        | 3.928377302  | 2.930238227  | 1.820802138  |
| 1        | -5.243384480 | 0.510050670  | 0.239390350  | 1        | 4.172023319  | 4.094592315  | -0.017253999 |
| 6        | -1.508353800 | 1.532722000  | 0.273294250  | 1        | 2.902920224  | 4.699672362  | 1.028432080  |
| 6        | -0.048408890 | 1.924849500  | 0.249584040  | 1        | 4.585149351  | 4.964425381  | 1.445376111  |
| 6        | 0.584251750  | 1.731719040  | -1.132846360 | 6        | 3.621315276  | 3.244246249  | 3.296719253  |
| 6        | 2.051923210  | 2.119718730  | -1.208558940 | 6        | 5.352126425  | 2.345410179  | 1.732236134  |
| 14       | 3.100263280  | 1.928202060  | -2.830283980 | 1        | 3.611011280  | 2.350720182  | 3.914775303  |
| 8        | 2.617070890  | 2.572003820  | -0.227195360 | 1        | 4.379601339  | 3.909142301  | 3.705647286  |
| 1        | 0.061443310  | 2.961109280  | 0.548081180  | 1        | 2.664161207  | 3.743517289  | 3.415113265  |
| 1        | 0.504881230  | 1.338328170  | 0.973997390  | 1        | 6.078722455  | 3.068837236  | 2.097498163  |
| 1        | 0.491847250  | 0.692930230  | -1.444127420 | 1        | 5.462503433  | 1.447967111  | 2.333202182  |
| 1        | 0.041155440  | 2.303569130  | -1.883351640 | 1        | 5.630264422  | 2.098983162  | 0.711525056  |
| 6        | 3.590704590  | 3.670208030  | -3.371464040 | 1        | 2.216722173  | 0.706659054  | -1.151551089 |
| 6        | 4.627256850  | 0.917172380  | -2.371354180 | 1        | 2.700640210  | 2.382529185  | -1.280766098 |
| 6        | 2.090020130  | 1.064103520  | -4.172522320 | 6        | -1.260218097 | 0.262957023  | 0.140051014  |
| 1        | 4.259862910  | 3.642543830  | -4.227318050 | 6        | -1.211638091 | -0.963747073 | -0.406022029 |
| 1        | 2.724843250  | 4.263043590  | -3.652643300 | 6        | -0.725579057 | -1.267551097 | -1.769097134 |
| 1        | 1.780392320  | 0.068748510  | -3.866852680 | 8        | -0.325713026 | -0.201117015 | -2.449086189 |
| 1        | 1.194926730  | 1.623551970  | -4.428627230 | 6        | 0.133701008  | -0.380162031 | -3.791212294 |
| 1        | 5.329887580  | 0.862961410  | -3.198449510 | 6        | -1.022531077 | -0.423691030 | -4.771371365 |
| 1        | 5.141769250  | 1.366353090  | -1.527800260 | 1        | 0.560739042  | 2.302185177  | 3.429843263  |
| 1        | 4.366773970  | -0.100729770 | -2.095343390 | 1        | -0.781157061 | 2.966784229  | 2.520334196  |
| 1        | 2.675261460  | 0.955782420  | -5.081534860 | 1        | -1.271302096 | 0.807956063  | 3.565005276  |
| 1        | 4.102187160  | 4.192129580  | -2.568712690 |          |              |              |              |

|          |              |              |              |   |             |              |              |
|----------|--------------|--------------|--------------|---|-------------|--------------|--------------|
| 1        | -2.363502183 | -0.341423028 | 1.846982140  | 6 | 5.820736428 | 6.764047633  | 6.273097408  |
| 1        | -1.555961122 | -1.829935139 | 0.130521013  | 1 | 4.771536760 | 6.598016789  | 6.138955050  |
| 1        | 0.764066060  | 0.477156035  | -3.972756307 | 6 | 2.394666114 | 8.762285908  | 8.031007877  |
| 1        | 0.733018056  | -1.275886099 | -3.843205297 | 6 | 6.501101998 | 9.826502367  | 9.607036422  |
| 1        | -0.639661050 | -0.483089038 | -5.785327432 | 1 | 7.312247640 | 9.158272472  | 9.331112821  |
| 1        | -1.650148127 | -1.287975100 | -4.593540356 | 6 | 5.944042664 | 10.676718859 | 8.675572649  |
| 1        | -1.627638128 | 0.472158035  | -4.686537362 | 6 | 6.369714696 | 7.979274081  | 6.425284339  |
| 6        | 2.842118218  | -0.010475000 | 1.969251152  | 1 | 7.429180307 | 8.077338562  | 6.527483653  |
| 1        | 3.837620297  | -0.412629029 | 1.802417139  | 6 | 4.998617703 | 10.689130129 | 11.310360300 |
| 1        | 2.692734206  | 0.052633006  | 3.043133235  | 6 | 4.886970130 | 11.569083948 | 9.031854249  |
| 8        | -0.714275053 | -2.378493182 | -2.213546168 | 1 | 4.467401587 | 12.228002440 | 8.281379943  |
| 1        | -0.023074001 | 0.009840003  | 2.657484207  | 6 | 6.009627517 | 9.829666582  | 10.931235229 |
| 1        | -2.485592191 | 1.359565104  | 1.479526115  | 1 | 6.458509050 | 9.162595691  | 11.656808888 |
| 1        | -0.914824070 | 1.103354086  | -0.433447031 | 6 | 6.814129603 | 9.308199552  | 3.341487537  |
| 1        | 2.135123163  | -0.735672054 | 1.577927122  | 1 | 7.227599336 | 10.020215319 | 4.047189389  |
| 1        | 3.910527301  | 1.137670087  | -1.001442078 | 1 | 7.464870084 | 9.310064425  | 2.468824162  |
| <b>3</b> |              |              |              | 1 | 6.863854431 | 8.319293006  | 3.781760114  |
| 16       | 6.438206954  | 10.557082043 | 7.024422895  | 6 | 4.430565490 | 11.572654995 | 10.332787885 |
| 14       | 5.099578065  | 9.797700837  | 2.789924921  | 1 | 3.638366251 | 12.249115925 | 10.629282669 |
| 8        | 1.840450547  | 8.425746746  | 9.209078091  | 6 | 2.681533260 | 8.083869880  | 10.284296198 |
| 8        | 7.841020650  | 10.275593138 | 6.949473087  | 1 | 3.214714576 | 7.161638450  | 10.078933250 |
| 8        | 7.890714680  | 5.601860674  | 6.416546565  | 1 | 2.033167445 | 7.933478552  | 11.134284879 |
| 8        | 6.019362103  | 4.471421117  | 6.057916846  | 1 | 3.394797563 | 8.867071153  | 10.499920211 |
| 8        | 5.907800796  | 11.668572869 | 6.299671631  | 6 | 4.276518124 | 8.398435168  | 1.810132210  |
| 7        | 5.672114351  | 9.196542147  | 6.403323748  | 6 | 6.749063132 | 3.255367068  | 6.015894669  |
| 6        | 4.237065547  | 9.180210361  | 6.523599122  | 1 | 7.479281116 | 3.280499770  | 5.220290608  |
| 6        | 1.509030149  | 9.185260194  | 7.019553406  | 1 | 6.020237732 | 2.482422604  | 5.831255360  |
| 1        | 0.453020065  | 9.184920938  | 7.217791300  | 1 | 7.248878876 | 3.082356244  | 6.957907802  |
| 6        | 3.733590252  | 8.752806174  | 7.773838000  | 6 | 4.517736228 | 10.753955030 | 12.758654401 |
| 1        | 4.441422508  | 8.487075267  | 8.528279178  | 1 | 4.666982919 | 9.801206954  | 13.256995750 |
| 6        | 6.705970430  | 5.581722569  | 6.262886933  | 1 | 3.465945486 | 11.019966877 | 12.801961102 |
| 6        | 2.007725000  | 9.623152198  | 5.814067048  | 1 | 5.083410213 | 11.514006598 | 13.295843076 |
| 1        | 1.329001117  | 9.977205698  | 5.062787101  | 8 | 2.985948044 | 11.089371383 | 3.772389941  |
| 6        | 3.395460627  | 9.645900258  | 5.526689723  | 6 | 5.247108120 | 11.377311489 | 1.808598215  |
| 6        | 3.785525078  | 10.253976935 | 4.183858294  | 1 | 5.720189522 | 12.150952592 | 2.406778886  |
|          |              |              |              | 1 | 5.866929103 | 11.215225555 | 0.930138079  |

|          |             |              |             |   |             |              |              |
|----------|-------------|--------------|-------------|---|-------------|--------------|--------------|
| 1        | 4.285777879 | 11.753414111 | 1.478743663 | 6 | 6.838580079 | 9.815393508  | 9.434757530  |
| 6        | 5.253742971 | 7.911899921  | 0.705213167 | 1 | 7.715392014 | 9.260079612  | 9.122024412  |
| 1        | 6.155180630 | 7.482793900  | 1.132221191 | 6 | 6.131277534 | 10.633097402 | 8.486795756  |
| 1        | 4.777437880 | 7.144178300  | 0.098860867 | 6 | 6.894960898 | 8.008323160  | 6.347576407  |
| 1        | 5.541229344 | 8.723010055  | 0.041440971 | 1 | 7.927505199 | 8.254617121  | 6.473132970  |
| 6        | 3.945979975 | 7.205382940  | 2.745357709 | 6 | 5.246343078 | 10.549282711 | 11.144689880 |
| 1        | 3.183184920 | 7.470605149  | 3.471564100 | 6 | 5.031959145 | 11.359256120 | 8.861506272  |
| 1        | 3.570151504 | 6.366480999  | 2.163128350 | 1 | 4.504499653 | 11.970005142 | 8.134647559  |
| 1        | 4.826324602 | 6.863354041  | 3.283246803 | 6 | 6.392219493 | 9.772764470  | 10.734179782 |
| 6        | 2.967755962 | 8.885927220  | 1.134973103 | 1 | 6.915367032 | 9.175880686  | 11.471429208 |
| 1        | 2.256126500 | 9.259361149  | 1.864903606 | 6 | 5.752950886 | 8.188934107  | 3.105460096  |
| 1        | 3.164819242 | 9.676689166  | 0.417281529 | 1 | 6.474173967 | 8.480415678  | 3.855159718  |
| 1        | 2.496519151 | 8.063079352  | 0.601119118 | 1 | 6.305801937 | 7.826648461  | 2.246962303  |
|          |             |              |             | 1 | 5.146195014 | 7.378179156  | 3.490998811  |
| <b>4</b> |             |              |             | 6 | 4.589420621 | 11.314346963 | 10.211632965 |
| 16       | 6.610029854 | 10.584372613 | 6.830916322 | 1 | 3.734053023 | 11.913106893 | 10.498754909 |
| 6        | 4.907216293 | 9.417265152  | 2.694911025 | 6 | 2.945325853 | 8.064947507  | 10.032083707 |
| 8        | 2.159330794 | 8.058467784  | 8.865520558 | 1 | 3.668845696 | 7.256735624  | 10.021596260 |
| 8        | 8.038355239 | 10.500917445 | 6.748654449 | 1 | 2.263206399 | 7.913378125  | 10.855295278 |
| 8        | 8.712204150 | 5.856111239  | 6.534061697 | 1 | 3.457869437 | 9.010537720  | 10.144048722 |
| 8        | 7.009768443 | 4.467788013  | 6.246176044 | 6 | 3.873543643 | 9.036281187  | 1.526325794  |
| 8        | 5.930928911 | 11.606293258 | 6.099617918 | 6 | 7.890028655 | 3.356824713  | 6.310751914  |
| 7        | 6.043458030 | 9.120186527  | 6.238465138 | 1 | 8.629417756 | 3.414842098  | 5.525342438  |
| 6        | 4.615525242 | 8.931052122  | 6.260608031 | 1 | 7.270975677 | 2.483769366  | 6.178710496  |
| 6        | 1.874078370 | 8.664343931  | 6.626486208 | 1 | 8.385568593 | 3.323290058  | 7.270259648  |
| 1        | 0.813837440 | 8.579852316  | 6.777857360 | 6 | 4.830115178 | 10.557921688 | 12.614646750 |
| 6        | 4.085574378 | 8.504661733  | 7.505527090 | 1 | 5.098567363 | 9.622824743  | 13.096355318 |
| 1        | 4.776831993 | 8.353284442  | 8.307889078 | 1 | 3.760220637 | 10.715219414 | 12.710306121 |
| 6        | 7.543921069 | 5.669987112  | 6.369082964 | 1 | 5.342020674 | 11.367384176 | 13.133219657 |
| 6        | 2.389851109 | 9.112244582  | 5.433289409 | 8 | 3.664948247 | 11.136093448 | 3.835575699  |
| 1        | 1.705687491 | 9.399949150  | 4.660145335 | 6 | 5.894076849 | 10.534856863 | 2.246114826  |
| 6        | 3.782738774 | 9.256133908  | 5.197531589 | 1 | 6.589929638 | 10.742457966 | 3.052742622  |
| 6        | 4.121021432 | 10.016659672 | 3.895119861 | 1 | 6.462269913 | 10.209513716 | 1.381254862  |
| 6        | 6.512000668 | 6.724253239  | 6.279754352 | 1 | 5.371284018 | 11.449824700 | 2.002309299  |
| 1        | 5.496197948 | 6.411585157  | 6.149467526 | 6 | 4.602527098 | 8.266479053  | 0.386995800  |
| 6        | 2.744501209 | 8.381041482  | 7.697976790 | 1 | 4.882684625 | 7.267146921  | 0.697530334  |

|   |             |             |              |   |             |              |             |
|---|-------------|-------------|--------------|---|-------------|--------------|-------------|
| 1 | 3.929365127 | 8.175324250 | -0.460483538 | 6 | 3.225694914 | 10.298172549 | 0.894120026 |
| 1 | 5.491074136 | 8.788481399 | 0.051419481  | 1 | 2.767560769 | 10.934784950 | 1.641957701 |
| 6 | 2.733542064 | 8.120652620 | 2.046222909  | 1 | 3.957632813 | 10.881869025 | 0.348308630 |
| 1 | 2.032925611 | 8.673694810 | 2.660748611  | 1 | 2.454881627 | 9.987976942  | 0.194821287 |
| 1 | 2.178363464 | 7.724890163 | 1.200788905  |   |             |              |             |
| 1 | 3.113749668 | 7.282930532 | 2.619744878  |   |             |              |             |

**7.2** Critical structures of **1** along the pathways for photogeneration of siloxy carbene and the intermolecular [2+1] cycloaddition with a fumarate as shown in Fig.1 and Fig. 2 of the main article.

|           |              |              |              |                                                              |              |              |              |
|-----------|--------------|--------------|--------------|--------------------------------------------------------------|--------------|--------------|--------------|
| <b>So</b> |              |              |              | 1                                                            | 2.724843250  | 4.263043590  | -3.652643300 |
| 6         | -3.221651750 | -0.146581420 | 0.532267830  | 1                                                            | 1.780392320  | 0.068748510  | -3.866852680 |
| 6         | -1.891899130 | 0.224089390  | 0.546688840  | 1                                                            | 1.194926730  | 1.623551970  | -4.428627230 |
| 6         | -2.500845010 | 2.466092390  | -0.003773030 | 1                                                            | 5.329887580  | 0.862961410  | -3.198449510 |
| 6         | -3.833636040 | 2.106563010  | -0.015281150 | 1                                                            | 5.141769250  | 1.366353090  | -1.527800260 |
| 6         | -4.206847520 | 0.792732700  | 0.245149070  | 1                                                            | 4.366773970  | -0.100729770 | -2.095343390 |
| 1         | -3.493704340 | -1.163631610 | 0.747572940  | 1                                                            | 2.675261460  | 0.955782420  | -5.081534860 |
| 1         | -1.139561410 | -0.509852860 | 0.775301530  | 1                                                            | 4.102187160  | 4.192129580  | -2.568712690 |
| 1         | -2.225270170 | 3.486119370  | -0.205311480 |                                                              |              |              |              |
| 1         | -4.583012920 | 2.846733080  | -0.228365810 |                                                              |              |              |              |
| 1         | -5.243384480 | 0.510050670  | 0.239390350  | <b>S<sub>NP</sub>-Min/STC(S<sub>NP</sub>/T<sub>NP</sub>)</b> |              |              |              |
| 6         | -1.508353800 | 1.532722000  | 0.273294250  | 6                                                            | -3.530101655 | 0.029000089  | -0.288734754 |
| 6         | -0.048408890 | 1.924849500  | 0.249584040  | 6                                                            | -2.154784172 | 0.152445390  | -0.254949350 |
| 6         | 0.584251750  | 1.731719040  | -1.132846360 | 6                                                            | -2.364058449 | 2.408000487  | 0.529922950  |
| 6         | 2.051923210  | 2.119718730  | -1.208558940 | 6                                                            | -3.752623953 | 2.289716465  | 0.498177751  |
| 14        | 3.100263280  | 1.928202060  | -2.830283980 | 6                                                            | -4.340590773 | 1.097773869  | 0.086496986  |
| 8         | 2.617070890  | 2.572003820  | -0.227195360 | 1                                                            | -3.976378123 | -0.898536100 | -0.603652396 |
| 1         | 0.061443310  | 2.961109280  | 0.548081180  | 1                                                            | -1.539739077 | -0.684039616 | -0.543387743 |
| 1         | 0.504881230  | 1.338328170  | 0.973997390  | 1                                                            | -1.916738518 | 3.332899298  | 0.853415209  |
| 1         | 0.491847250  | 0.692930230  | -1.444127420 | 1                                                            | -4.367870035 | 3.120999391  | 0.795719130  |
| 1         | 0.041155440  | 2.303569130  | -1.883351640 | 1                                                            | -5.411758880 | 1.000538915  | 0.062628023  |
| 6         | 3.590704590  | 3.670208030  | -3.371464040 | 6                                                            | -1.545393045 | 1.341501395  | 0.152129780  |
| 6         | 4.627256850  | 0.917172380  | -2.371354180 | 6                                                            | -0.038722232 | 1.484924712  | 0.146393099  |
| 6         | 2.090020130  | 1.064103520  | -4.172522320 | 6                                                            | 0.489848198  | 1.992586503  | -1.210083162 |
| 1         | 4.259862910  | 3.642543830  | -4.227318050 | 6                                                            | 1.989997207  | 2.171133595  | -1.243660475 |
|           |              |              |              | 14                                                           | 3.155638741  | 1.877935220  | -2.701639397 |

|   |             |              |              |   |              |              |              |
|---|-------------|--------------|--------------|---|--------------|--------------|--------------|
| 8 | 2.405252183 | 3.140497059  | -0.368054776 | 1 | 0.437669321  | 2.360397665  | 0.585378783  |
| 1 | 0.267207873 | 2.164854045  | 0.934268905  | 1 | 0.675967864  | 0.845480339  | -0.242104608 |
| 1 | 0.425272539 | 0.526461508  | 0.363568576  | 1 | -0.165603321 | 1.870882060  | -2.363269012 |
| 1 | 0.202001167 | 1.289397730  | -1.985516690 | 1 | -0.425354160 | 3.377202017  | -1.529004611 |
| 1 | 0.010491231 | 2.939950730  | -1.456993557 | 6 | 3.864818240  | 3.234519183  | -3.935268195 |
| 6 | 3.156965637 | 3.404072510  | -3.819712066 | 6 | 4.242452540  | 1.294330779  | -1.578077646 |
| 6 | 4.892713180 | 1.590898240  | -2.018248420 | 6 | 2.175450200  | 0.619853226  | -3.800202910 |
| 6 | 2.553713538 | 0.362112200  | -3.653691954 | 1 | 4.732755428  | 2.779959995  | -4.405791925 |
| 1 | 3.859787712 | 3.285807126  | -4.641593206 | 1 | 3.211013897  | 3.595742129  | -4.723681319 |
| 1 | 2.174962484 | 3.584408216  | -4.250422478 | 1 | 1.672983924  | -0.096673725 | -3.156448716 |
| 1 | 2.412744714 | -0.493311099 | -2.997345512 | 1 | 1.443162118  | 1.001979505  | -4.505606782 |
| 1 | 1.611460449 | 0.549143932  | -4.162601857 | 1 | 5.082824440  | 0.837530377  | -2.094770482 |
| 1 | 5.605896180 | 1.446340441  | -2.827055564 | 1 | 4.639521779  | 2.072390772  | -0.931947965 |
| 1 | 5.236017020 | 2.433769074  | -1.424554055 | 1 | 3.796088805  | 0.535979690  | -0.940882626 |
| 1 | 4.927372501 | 0.706422348  | -1.386537157 | 1 | 2.923694908  | 0.074922741  | -4.369670391 |
| 1 | 3.281167533 | 0.077802893  | -4.410726878 | 1 | 4.211881341  | 4.098819462  | -3.375344838 |
| 1 | 3.442314129 | 4.295287433  | -3.266845430 |   |              |              |              |

**T<sub>NP</sub>-TS**

**T<sub>NP</sub>-Min**

|    |              |              |              |
|----|--------------|--------------|--------------|
| 6  | -3.237730728 | -0.179487451 | -0.200285249 |
| 6  | -1.909107268 | 0.164749060  | -0.432845579 |
| 6  | -2.204705230 | 2.192422248  | 0.800011340  |
| 6  | -3.535916731 | 1.860556341  | 1.040378109  |
| 6  | -4.058755892 | 0.671582429  | 0.539341241  |
| 1  | -3.626545278 | -1.103334464 | -0.588796617 |
| 1  | -1.281462939 | -0.501429078 | -0.999057012 |
| 1  | -1.810824755 | 3.111860670  | 1.197393746  |
| 1  | -4.156197342 | 2.523367757  | 1.616184393  |
| 1  | -5.084888803 | 0.410296220  | 0.724017111  |
| 6  | -1.378799411 | 1.356326708  | 0.065975533  |
| 6  | 0.057907935  | 1.737582337  | -0.216624665 |
| 6  | 0.204214988  | 2.491948880  | -1.555460335 |
| 6  | 1.622828864  | 2.907355989  | -1.862346738 |
| 14 | 2.987066968  | 2.003091958  | -2.803977805 |
| 8  | 2.055654615  | 3.870589188  | -1.050497692 |

|    |              |              |              |
|----|--------------|--------------|--------------|
| 6  | -3.150916506 | -0.746174005 | 0.291589317  |
| 6  | -1.977234151 | -0.023933909 | 0.203673745  |
| 6  | -3.228805391 | 2.006655771  | -0.037784139 |
| 6  | -4.417850281 | 1.282933899  | 0.049741799  |
| 6  | -4.381666882 | -0.098834498 | 0.214037523  |
| 1  | -3.113057250 | -1.813200597 | 0.424219440  |
| 1  | -1.033841452 | -0.538974114 | 0.271245452  |
| 1  | -3.265426605 | 3.075943214  | -0.158811585 |
| 1  | -5.361788514 | 1.795766006  | -0.005861342 |
| 1  | -5.295401958 | -0.661616455 | 0.284861177  |
| 6  | -1.990912192 | 1.362514119  | 0.034890312  |
| 6  | -0.698941046 | 2.144177746  | -0.089775666 |
| 6  | -0.248006702 | 2.320140352  | -1.553751511 |
| 6  | 1.077517043  | 3.084335684  | -1.681175953 |
| 14 | 2.879131050  | 2.318779864  | -1.808456036 |
| 8  | 1.588445874  | 3.829466316  | -0.744461175 |
| 1  | -0.821157750 | 3.125472706  | 0.356622777  |
| 1  | 0.083822391  | 1.645310473  | 0.470697755  |

|   |              |             |              |   |             |             |              |
|---|--------------|-------------|--------------|---|-------------|-------------|--------------|
| 1 | -0.143822910 | 1.350759086 | -2.030407193 | 6 | 3.822385000 | 5.174836000 | -0.456174000 |
| 1 | -1.022301943 | 2.846993190 | -2.105354207 | 6 | 3.004666000 | 2.541873000 | 1.151194000  |
| 6 | 4.314660024  | 3.548027270 | -1.819923677 | 6 | 3.346626000 | 2.557491000 | -1.861564000 |
| 6 | 3.052094079  | 1.054070782 | -0.420856232 | 1 | 4.888159000 | 4.969067000 | -0.515940000 |
| 6 | 2.810151314  | 1.489481907 | -3.494984929 | 1 | 3.549384000 | 5.750812000 | -1.338313000 |
| 1 | 5.210321523  | 3.029297541 | -2.157275428 | 1 | 2.899505000 | 1.567974000 | -1.875287000 |
| 1 | 4.134142239  | 4.369317509 | -2.507182469 | 1 | 3.161035000 | 3.027768000 | -2.821431000 |
| 1 | 1.991915258  | 0.776902561 | -3.552715378 | 1 | 4.057599000 | 2.335202000 | 1.326850000  |
| 1 | 2.649841120  | 2.234079219 | -4.270570971 | 1 | 2.603905000 | 3.024106000 | 2.036539000  |
| 1 | 3.994060010  | 0.517709719 | -0.511781018 | 1 | 2.504963000 | 1.582878000 | 1.038404000  |
| 1 | 3.027837752  | 1.517015905 | 0.560655299  | 1 | 4.425430000 | 2.428361000 | -1.761333000 |
| 1 | 2.255304582  | 0.316443936 | -0.464122796 | 1 | 3.642875000 | 5.806294000 | 0.409367000  |
| 1 | 3.727564019  | 0.957480064 | -3.733403034 |   |             |             |              |
| 1 | 4.518899556  | 3.969224890 | -0.841490920 |   |             |             |              |

**SNP-TS**

|    |              |              |              |
|----|--------------|--------------|--------------|
| 6  | -3.284971000 | -0.483030000 | 0.578484000  |
| 6  | -2.217873000 | 0.387829000  | 0.680565000  |
| 6  | -3.626114000 | 2.212212000  | 0.016162000  |
| 6  | -4.706729000 | 1.338178000  | -0.090180000 |
| 6  | -4.538296000 | -0.015018000 | 0.191314000  |
| 1  | -3.146661000 | -1.526254000 | 0.801821000  |
| 1  | -1.254548000 | 0.012172000  | 0.983940000  |
| 1  | -3.763546000 | 3.258458000  | -0.199760000 |
| 1  | -5.670948000 | 1.712459000  | -0.386508000 |
| 1  | -5.369081000 | -0.692678000 | 0.113718000  |
| 6  | -2.366913000 | 1.747037000  | 0.403724000  |
| 6  | -1.183635000 | 2.684808000  | 0.467770000  |
| 6  | -0.542985000 | 2.843557000  | -0.924935000 |
| 6  | 0.634273000  | 3.760662000  | -0.905262000 |
| 14 | 2.785168000  | 3.613791000  | -0.376210000 |
| 8  | 1.252482000  | 4.422903000  | 0.036676000  |
| 1  | -1.489856000 | 3.661036000  | 0.831194000  |
| 1  | -0.443074000 | 2.305507000  | 1.164515000  |
| 1  | -0.245986000 | 1.869188000  | -1.306511000 |
| 1  | -1.286607000 | 3.226065000  | -1.622983000 |

**S<sub>ΣP</sub>(σ<sup>1</sup>π<sup>1</sup>)-Min**

|    |              |              |              |
|----|--------------|--------------|--------------|
| 6  | -3.293470000 | -0.497938000 | 0.608886000  |
| 6  | -2.262862000 | 0.420774000  | 0.645856000  |
| 6  | -3.782323000 | 2.168463000  | 0.023804000  |
| 6  | -4.826721000 | 1.245846000  | -0.016725000 |
| 6  | -4.583905000 | -0.093403000 | 0.275609000  |
| 1  | -3.097331000 | -1.530157000 | 0.840737000  |
| 1  | -1.270833000 | 0.093520000  | 0.907723000  |
| 1  | -3.978350000 | 3.203612000  | -0.198435000 |
| 1  | -5.819250000 | 1.572039000  | -0.270962000 |
| 1  | -5.385592000 | -0.810213000 | 0.248010000  |
| 6  | -2.484871000 | 1.768159000  | 0.354444000  |
| 6  | -1.346291000 | 2.763211000  | 0.346695000  |
| 6  | -0.723620000 | 2.907840000  | -1.061205000 |
| 6  | 0.418472000  | 3.876599000  | -1.098708000 |
| 14 | 2.991862000  | 3.643819000  | -0.273858000 |
| 8  | 1.352098000  | 4.075065000  | -0.195157000 |
| 1  | -1.693207000 | 3.737808000  | 0.674423000  |
| 1  | -0.574593000 | 2.453892000  | 1.042918000  |
| 1  | -0.402398000 | 1.919890000  | -1.407161000 |
| 1  | -1.475219000 | 3.244059000  | -1.767341000 |
| 6  | 3.982518000  | 5.238340000  | -0.285973000 |
| 6  | 3.322816000  | 2.645501000  | 1.282686000  |

|   |             |             |              |   |             |             |             |
|---|-------------|-------------|--------------|---|-------------|-------------|-------------|
| 6 | 3.296031000 | 2.625289000 | -1.823767000 | 1 | 6.619049574 | 3.690086252 | 1.593195499 |
| 1 | 5.050581000 | 5.033440000 | -0.278618000 | 1 | 5.680139642 | 3.790037235 | 0.117480376 |
| 1 | 3.765126000 | 5.832066000 | -1.169203000 | 1 | 3.664101336 | 0.631169507 | 2.251934691 |
| 1 | 2.676355000 | 1.732959000 | -1.842541000 | 1 | 4.452584290 | 0.929605467 | 0.713599346 |
| 1 | 3.084363000 | 3.190499000 | -2.725872000 | 1 | 4.981386019 | 3.252880384 | 4.380285057 |
| 1 | 4.369800000 | 2.360323000 | 1.353328000  | 1 | 3.890668094 | 4.557777033 | 3.950775232 |
| 1 | 3.074049000 | 3.215047000 | 2.174195000  | 1 | 3.254570016 | 2.959003048 | 4.289202688 |
| 1 | 2.731197000 | 1.733665000 | 1.297658000  | 1 | 5.401823048 | 0.857377323 | 2.183297740 |
| 1 | 4.334354000 | 2.304304000 | -1.867220000 | 1 | 5.550005167 | 5.055054906 | 1.323741064 |
| 1 | 3.756985000 | 5.846095000 | 0.586636000  |   |             |             |             |

**STC( $T_{\Sigma P}/S_0$ )/ $T_{\Sigma P}(\sigma^1\pi^1)$ -Min**

|    |              |              |              |
|----|--------------|--------------|--------------|
| 6  | -2.211287306 | 0.169809661  | -1.968919681 |
| 6  | -0.933057920 | 0.481135977  | -1.517060721 |
| 6  | -1.879354886 | 1.630165843  | 0.364920255  |
| 6  | -3.158121593 | 1.318364570  | -0.088794191 |
| 6  | -3.321576481 | 0.585733623  | -1.261179152 |
| 1  | -2.332110251 | -0.399746569 | -2.872583482 |
| 1  | -0.077204320 | 0.146160227  | -2.076153704 |
| 1  | -1.761694119 | 2.192392551  | 1.274452039  |
| 1  | -4.017730923 | 1.641471805  | 0.469477594  |
| 1  | -4.308067783 | 0.342642465  | -1.611797239 |
| 6  | -0.745661936 | 1.215837113  | -0.343531048 |
| 6  | 0.644532783  | 1.584679905  | 0.129399760  |
| 6  | 1.104160451  | 2.948289495  | -0.420562724 |
| 6  | 2.469346047  | 3.349566370  | 0.032299693  |
| 14 | 4.244254844  | 3.048377370  | 2.011760236  |
| 8  | 2.791030277  | 3.551897106  | 1.319566136  |
| 1  | 0.667264560  | 1.616567517  | 1.212869418  |
| 1  | 1.350875580  | 0.820783489  | -0.177734847 |
| 1  | 1.110811664  | 2.920952161  | -1.504774939 |
| 1  | 0.385277699  | 3.713330542  | -0.132434629 |
| 6  | 5.654773583  | 3.982915981  | 1.186380747  |
| 6  | 4.077859053  | 3.495449097  | 3.827150679  |
| 6  | 4.455905534  | 1.194062268  | 1.766881797  |

**So( $\sigma^2\pi^0$ )-Min**

|    |              |              |              |
|----|--------------|--------------|--------------|
| 6  | -2.614837056 | -0.022787198 | -1.043224416 |
| 6  | -1.338627756 | 0.230665257  | -0.543342726 |
| 6  | -2.000400589 | 2.464238143  | 0.016511055  |
| 6  | -3.268096347 | 2.220376079  | -0.477537291 |
| 6  | -3.585706378 | 0.974962598  | -1.012833480 |
| 1  | -2.848331744 | -0.991032844 | -1.449909620 |
| 1  | -0.594574413 | -0.547414009 | -0.566706076 |
| 1  | -1.771954352 | 3.431481685  | 0.431630075  |
| 1  | -4.012144377 | 2.996920577  | -0.444896453 |
| 1  | -4.572657709 | 0.784404315  | -1.395436495 |
| 6  | -1.012865316 | 1.479465360  | -0.006576895 |
| 6  | 0.379182625  | 1.762438597  | 0.512166889  |
| 6  | 1.299655709  | 2.314835286  | -0.589801763 |
| 6  | 2.724756140  | 2.651848252  | -0.235497830 |
| 14 | 4.447632229  | 2.744677091  | 1.747800295  |
| 8  | 2.930974027  | 2.448507322  | 1.038550219  |
| 1  | 0.332451225  | 2.474381576  | 1.328154666  |
| 1  | 0.813754994  | 0.854161608  | 0.915341462  |
| 1  | 1.347278518  | 1.618130220  | -1.425936197 |
| 1  | 0.872846021  | 3.223674161  | -1.013978646 |
| 6  | 4.872966581  | 4.562587932  | 1.540176617  |
| 6  | 4.209880373  | 2.300146712  | 3.555824141  |
| 6  | 5.726935686  | 1.636046574  | 0.933349719  |
| 1  | 5.814518277  | 4.795640386  | 2.032072477  |



|   |             |             |              |
|---|-------------|-------------|--------------|
| 1 | 4.968787304 | 4.830881427 | 0.492440092  |
| 1 | 5.444861193 | 0.588537352 | 1.006398696  |
| 1 | 5.847878881 | 1.874860552 | -0.118941017 |
| 1 | 5.129883803 | 2.450115196 | 4.115629656  |
| 1 | 3.439287679 | 2.912776706 | 4.016109984  |
| 1 | 3.917570015 | 1.260018100 | 3.672696937  |
| 1 | 6.695523624 | 1.748945673 | 1.414872382  |
| 1 | 4.108119789 | 5.199332480 | 1.978033113  |

**CYC-S<sub>0</sub>-TS**

|    |              |              |              |
|----|--------------|--------------|--------------|
| 6  | 0.253517533  | -0.841480617 | -5.826898538 |
| 6  | 0.979639255  | -0.641286328 | -4.648602127 |
| 6  | -0.040348067 | 1.523727359  | -4.378656202 |
| 6  | -0.770769730 | 1.339348131  | -5.549315490 |
| 6  | -0.632584400 | 0.158636597  | -6.285561278 |
| 1  | 0.365213049  | -1.756360562 | -6.381212923 |
| 1  | 1.648230616  | -1.410701602 | -4.301166296 |
| 1  | -0.160956695 | 2.432291400  | -3.815934788 |
| 1  | -1.446239686 | 2.106717203  | -5.884634528 |
| 1  | -1.195990839 | 0.008676343  | -7.189033533 |
| 6  | 0.843381860  | 0.537564941  | -3.912320217 |
| 6  | 1.644767654  | 0.770499559  | -2.651219362 |
| 6  | 3.054474789  | 1.309790581  | -2.938489852 |
| 6  | 3.830104086  | 1.904059420  | -1.790409594 |
| 14 | 4.164082543  | 1.485055218  | 0.892349113  |
| 8  | 3.432222078  | 1.418168801  | -0.657285806 |
| 1  | 1.114071687  | 1.475211018  | -2.022221684 |
| 1  | 1.715797920  | -0.147149535 | -2.078464086 |
| 1  | 3.704762332  | 0.493596143  | -3.263248988 |
| 1  | 3.047109515  | 2.013406231  | -3.759263556 |
| 6  | 2.707246003  | 1.564316556  | 2.066780562  |
| 6  | 5.106628590  | -0.133487035 | 1.038821825  |
| 6  | 5.318648397  | 2.956872506  | 1.087249798  |
| 1  | 3.036590805  | 1.665159986  | 3.098537092  |
| 1  | 2.076990253  | 2.413086319  | 1.826245663  |

|   |              |              |              |
|---|--------------|--------------|--------------|
| 1 | 5.879523416  | 3.168574326  | 0.183097921  |
| 1 | 4.783198292  | 3.857332314  | 1.373184470  |
| 1 | 5.525922522  | -0.252478043 | 2.034973638  |
| 1 | 4.454607044  | -0.982068496 | 0.851524845  |
| 1 | 5.927730194  | -0.181940272 | 0.328279096  |
| 1 | 6.034788995  | 2.743493936  | 1.877892748  |
| 1 | 2.099811096  | 0.665662015  | 1.998980377  |
| 6 | 3.582520779  | 4.195054430  | -1.787297656 |
| 6 | 2.305921110  | 4.226428111  | -2.163601773 |
| 1 | 3.846408301  | 4.216282539  | -0.752960084 |
| 1 | 2.018108622  | 4.287714557  | -3.193533632 |
| 6 | 1.227657869  | 4.144877150  | -1.160327547 |
| 8 | 1.386146074  | 4.066189276  | 0.021659680  |
| 8 | 0.032761443  | 4.163273558  | -1.729851010 |
| 6 | -1.098416232 | 4.115663915  | -0.873685222 |
| 1 | -1.097756967 | 4.962621902  | -0.203366214 |
| 1 | -1.958659495 | 4.152047856  | -1.522551157 |
| 1 | -1.099356194 | 3.201018283  | -0.299228218 |
| 6 | 4.734083737  | 4.391393467  | -2.711844405 |
| 8 | 5.810801866  | 4.735232369  | -2.335653797 |
| 8 | 4.420138327  | 4.210774736  | -3.978066040 |
| 6 | 5.433576012  | 4.454192502  | -4.941542830 |
| 1 | 4.976177481  | 4.267969975  | -5.899029683 |
| 1 | 5.771503417  | 5.477579005  | -4.879065434 |
| 1 | 6.267550413  | 3.786653908  | -4.786629196 |

**STC(T<sub>1</sub>/S<sub>0</sub>)**

|   |             |              |              |
|---|-------------|--------------|--------------|
| 6 | 0.678403439 | -1.464307596 | -5.397645723 |
| 6 | 0.900172882 | -0.712307789 | -4.247631412 |
| 6 | 0.526597287 | 1.302995453  | -5.493610059 |
| 6 | 0.304670801 | 0.550895631  | -6.643206569 |
| 6 | 0.379947601 | -0.827213188 | -6.599969612 |
| 1 | 0.734191014 | -2.537932271 | -5.355567506 |
| 1 | 1.125919002 | -1.212373690 | -3.320957355 |
| 1 | 0.459483341 | 2.376827761  | -5.541749155 |

|    |              |              |              |           |             |              |              |
|----|--------------|--------------|--------------|-----------|-------------|--------------|--------------|
| 1  | 0.070226639  | 1.048746163  | -7.568066951 | 8         | 5.701262440 | 5.953145307  | -2.706832981 |
| 1  | 0.205657779  | -1.407424042 | -7.489101269 | 8         | 4.164996411 | 4.887340162  | -3.900303232 |
| 6  | 0.828024735  | 0.685170230  | -4.277994137 | 6         | 4.876372472 | 5.185461871  | -5.091919399 |
| 6  | 1.104210675  | 1.504339506  | -3.035002347 | 1         | 4.296466582 | 4.757630839  | -5.894253541 |
| 6  | 2.598188679  | 1.860142466  | -2.895404335 | 1         | 4.964609778 | 6.254543289  | -5.220739276 |
| 6  | 2.926848048  | 2.629836241  | -1.642678118 | 1         | 5.861590922 | 4.743097547  | -5.063059776 |
| 14 | 3.659057452  | 1.446554504  | 0.759393096  |           |             |              |              |
| 8  | 2.662949920  | 1.981405967  | -0.482816882 | <b>P1</b> |             |              |              |
| 1  | 0.513451978  | 2.414136239  | -3.058579305 | 6         | 1.287682958 | -1.573407054 | -5.286891470 |
| 1  | 0.793112408  | 0.954761950  | -2.153584808 | 6         | 1.349820580 | -0.790403746 | -4.136539153 |
| 1  | 3.175192571  | 0.937955942  | -2.894129579 | 6         | 0.715165557 | 1.136959820  | -5.415106032 |
| 1  | 2.922852373  | 2.434153077  | -3.755722657 | 6         | 0.650320717 | 0.355373710  | -6.562307062 |
| 6  | 2.587502908  | 1.444475377  | 2.299826311  | 6         | 0.936658288 | -0.995422607 | -6.503739259 |
| 6  | 4.210068316  | -0.303256465 | 0.328618572  | 1         | 1.509788317 | -2.624600318 | -5.232376572 |
| 6  | 5.158750988  | 2.564075395  | 0.957314013  | 1         | 1.625345399 | -1.244408779 | -3.200327469 |
| 1  | 3.133363724  | 1.053506991  | 3.155723732  | 1         | 0.489845521 | 2.188355584  | -5.476903616 |
| 1  | 2.257249049  | 2.450073375  | 2.541820364  | 1         | 0.374593117 | 0.807047402  | -7.499367414 |
| 1  | 5.697806754  | 2.694668238  | 0.022465983  | 1         | 0.885465486 | -1.598300732 | -7.392897639 |
| 1  | 4.878058272  | 3.546441987  | 1.324814621  | 6         | 1.065673337 | 0.578129542  | -4.183044906 |
| 1  | 4.827462725  | -0.729287134 | 1.116642181  | 6         | 1.185788815 | 1.442826175  | -2.945383269 |
| 1  | 3.354468144  | -0.959472178 | 0.188911375  | 6         | 2.535453584 | 2.172996776  | -2.897655720 |
| 1  | 4.793056557  | -0.323245906 | -0.589548488 | 6         | 2.707033951 | 3.013269360  | -1.650163436 |
| 1  | 5.853195525  | 2.128582225  | 1.672840364  | 14        | 3.647467221 | 1.416173025  | 0.486916462  |
| 1  | 1.704732797  | 0.824904637  | 2.162096799  | 8         | 2.615154086 | 2.277261654  | -0.495027818 |
| 6  | 3.875811850  | 4.999640703  | -1.588953413 | 1         | 0.378052180 | 2.168913295  | -2.915517648 |
| 6  | 2.635169384  | 4.174794043  | -1.636862073 | 1         | 1.083360176 | 0.826065673  | -2.060826418 |
| 1  | 4.250972855  | 5.359576236  | -0.652624834 | 1         | 3.333490129 | 1.435187650  | -2.915412231 |
| 1  | 2.085419788  | 4.381286345  | -2.547904563 | 1         | 2.655793814 | 2.785655011  | -3.779060119 |
| 6  | 1.735857796  | 4.485772541  | -0.460339754 | 6         | 2.741351398 | 1.267160077  | 2.124354808  |
| 8  | 2.108855302  | 4.932856005  | 0.580618808  | 6         | 3.935107023 | -0.286595368 | -0.271058022 |
| 8  | 0.468972755  | 4.275822378  | -0.753896495 | 6         | 5.304379768 | 2.283359342  | 0.716231548  |
| 6  | -0.482113820 | 4.490967649  | 0.278403073  | 1         | 3.321613005 | 0.703683824  | 2.851353917  |
| 1  | -0.443829534 | 5.515597586  | 0.618546883  | 1         | 2.543053199 | 2.250116650  | 2.542358124  |
| 1  | -1.443269753 | 4.276199073  | -0.160786349 | 1         | 5.823402370 | 2.453550085  | -0.222979309 |
| 1  | -0.290090239 | 3.825733082  | 1.107346717  | 1         | 5.195682654 | 3.241479197  | 1.216530552  |
| 6  | 4.690185230  | 5.316019180  | -2.760982784 |           |             |              |              |

|   |              |              |              |   |              |             |              |
|---|--------------|--------------|--------------|---|--------------|-------------|--------------|
| 1 | 4.533524512  | -0.908301167 | 0.391422722  | 1 | -0.306100190 | 6.312305155 | 1.015314755  |
| 1 | 2.995817777  | -0.805321935 | -0.446369801 | 1 | -1.603687465 | 5.284748032 | 0.383408041  |
| 1 | 4.461183421  | -0.225909795 | -1.220666109 | 1 | -0.395086628 | 4.615691790 | 1.492447787  |
| 1 | 5.952123624  | 1.665850176  | 1.335364818  | 6 | 4.495909937  | 4.740702189 | -2.697584111 |
| 1 | 1.787143110  | 0.762222348  | 1.999209839  | 8 | 5.649839217  | 4.998958530 | -2.545479053 |
| 6 | 3.631805993  | 4.249042305  | -1.588770318 | 8 | 3.868314255  | 4.883844677 | -3.850696653 |
| 6 | 2.142586742  | 4.440956965  | -1.587996857 | 6 | 4.629849477  | 5.355658207 | -4.953541109 |
| 1 | 4.107616917  | 4.380129299  | -0.639052999 | 1 | 3.947360075  | 5.387904470 | -5.787475098 |
| 1 | 1.680181518  | 4.806458045  | -2.487159937 | 1 | 5.017589099  | 6.341783344 | -4.745871446 |
| 6 | 1.497064028  | 4.907721361  | -0.324943598 | 1 | 5.446935197  | 4.680991209 | -5.161148938 |
| 8 | 2.062131501  | 5.113676993  | 0.703242718  |   |              |             |              |
| 8 | 0.184001712  | 4.954518701  | -0.457194049 |   |              |             |              |
| 6 | -0.570400109 | 5.316732140  | 0.689476822  |   |              |             |              |

**7.3 Critical Structures of **3** along the pathways for photogeneration of siloxy carbene and the intramolecular [2+1] cycloaddition as shown in Fig.3 of the main article.**

| <b>S<sub>0</sub>-Min</b> |             |              |             | 6 | 3.785525078 | 10.253976935 | 4.183858294  |
|--------------------------|-------------|--------------|-------------|---|-------------|--------------|--------------|
| 16                       | 6.438206954 | 10.557082043 | 7.024422895 | 6 | 5.820736428 | 6.764047633  | 6.273097408  |
| 14                       | 5.099578065 | 9.797700837  | 2.789924921 | 1 | 4.771536760 | 6.598016789  | 6.138955050  |
| 8                        | 1.840450547 | 8.425746746  | 9.209078091 | 6 | 2.394666114 | 8.762285908  | 8.031007877  |
| 8                        | 7.841020650 | 10.275593138 | 6.949473087 | 6 | 6.501101998 | 9.826502367  | 9.607036422  |
| 8                        | 7.890714680 | 5.601860674  | 6.416546565 | 1 | 7.312247640 | 9.158272472  | 9.331112821  |
| 8                        | 6.019362103 | 4.471421117  | 6.057916846 | 6 | 5.944042664 | 10.676718859 | 8.675572649  |
| 8                        | 5.907800796 | 11.668572869 | 6.299671631 | 6 | 6.369714696 | 7.979274081  | 6.425284339  |
| 7                        | 5.672114351 | 9.196542147  | 6.403323748 | 1 | 7.429180307 | 8.077338562  | 6.527483653  |
| 6                        | 4.237065547 | 9.180210361  | 6.523599122 | 6 | 4.998617703 | 10.689130129 | 11.310360300 |
| 6                        | 1.509030149 | 9.185260194  | 7.019553406 | 6 | 4.886970130 | 11.569083948 | 9.031854249  |
| 1                        | 0.453020065 | 9.184920938  | 7.217791300 | 1 | 4.467401587 | 12.228002440 | 8.281379943  |
| 6                        | 3.733590252 | 8.752806174  | 7.773838000 | 6 | 6.009627517 | 9.829666582  | 10.931235229 |
| 1                        | 4.441422508 | 8.487075267  | 8.528279178 | 1 | 6.458509050 | 9.162595691  | 11.656808888 |
| 6                        | 6.705970430 | 5.581722569  | 6.262886933 | 6 | 6.814129603 | 9.308199552  | 3.341487537  |
| 6                        | 2.007725000 | 9.623152198  | 5.814067048 | 1 | 7.227599336 | 10.020215319 | 4.047189389  |
| 1                        | 1.329001117 | 9.977205698  | 5.062787101 | 1 | 7.464870084 | 9.310064425  | 2.468824162  |
| 6                        | 3.395460627 | 9.645900258  | 5.526689723 | 1 | 6.863854431 | 8.319293006  | 3.781760114  |
|                          |             |              |             | 6 | 4.430565490 | 11.572654995 | 10.332787885 |

|                |             |              |              |   |             |              |              |
|----------------|-------------|--------------|--------------|---|-------------|--------------|--------------|
| 1              | 3.638366251 | 12.249115925 | 10.629282669 | 8 | 1.761791995 | 8.606873006  | 9.210385847  |
| 6              | 2.681533260 | 8.083869880  | 10.284296198 | 8 | 7.799242794 | 10.246982058 | 6.924335210  |
| 1              | 3.214714576 | 7.161638450  | 10.078933250 | 8 | 7.710165171 | 5.604783637  | 6.312609644  |
| 1              | 2.033167445 | 7.933478552  | 11.134284879 | 8 | 5.812362515 | 4.543915717  | 5.885756066  |
| 1              | 3.394797563 | 8.867071153  | 10.499920211 | 8 | 5.917646668 | 11.743069278 | 6.381976738  |
| 6              | 4.276518124 | 8.398435168  | 1.810132210  | 7 | 5.591378890 | 9.259905090  | 6.386718801  |
| 6              | 6.749063132 | 3.255367068  | 6.015894669  | 6 | 4.158585894 | 9.283869199  | 6.500773961  |
| 1              | 7.479281116 | 3.280499770  | 5.220290608  | 6 | 1.429924865 | 9.353790924  | 7.010325243  |
| 1              | 6.020237732 | 2.482422604  | 5.831255360  | 1 | 0.375198856 | 9.372976403  | 7.214498495  |
| 1              | 7.248878876 | 3.082356244  | 6.957907802  | 6 | 3.646985241 | 8.882963774  | 7.753498596  |
| 6              | 4.517736228 | 10.753955030 | 12.758654401 | 1 | 4.355352760 | 8.600921720  | 8.502060932  |
| 1              | 4.666982919 | 9.801206954  | 13.256995750 | 6 | 6.527761207 | 5.626155731  | 6.139273032  |
| 1              | 3.465945486 | 11.019966877 | 12.801961102 | 6 | 1.920975407 | 9.746809702  | 5.789192701  |
| 1              | 5.083410213 | 11.514006598 | 13.295843076 | 1 | 1.222348946 | 10.056785436 | 5.038484620  |
| 8              | 2.985948044 | 11.089371383 | 3.772389941  | 6 | 3.319592792 | 9.736351149  | 5.471813142  |
| 6              | 5.247108120 | 11.377311489 | 1.808598215  | 6 | 3.738318361 | 10.201262414 | 4.167982145  |
| 1              | 5.720189522 | 12.150952592 | 2.406778886  | 6 | 5.677062476 | 6.832397701  | 6.179889238  |
| 1              | 5.866929103 | 11.215225555 | 0.930138079  | 1 | 4.625826650 | 6.703739683  | 6.024677159  |
| 1              | 4.285777879 | 11.753414111 | 1.478743663  | 6 | 2.313791823 | 8.922668049  | 8.023099535  |
| 6              | 5.253742971 | 7.911899921  | 0.705213167  | 6 | 6.551577411 | 9.767584672  | 9.595521948  |
| 1              | 6.155180630 | 7.482793900  | 1.132221191  | 1 | 7.349315395 | 9.106874808  | 9.268715468  |
| 1              | 4.777437880 | 7.144178300  | 0.098860867  | 6 | 5.960146375 | 10.640702738 | 8.706864434  |
| 1              | 5.541229344 | 8.723010055  | 0.041440971  | 6 | 6.256812772 | 8.026115634  | 6.378056011  |
| 6              | 3.945979975 | 7.205382940  | 2.745357709  | 1 | 7.317192060 | 8.092895315  | 6.499389316  |
| 1              | 3.183184920 | 7.470605149  | 3.471564100  | 6 | 5.123183212 | 10.589455519 | 11.378268770 |
| 1              | 3.570151504 | 6.366480999  | 2.163128350  | 6 | 4.920778587 | 11.524479492 | 9.127742543  |
| 1              | 4.826324602 | 6.863354041  | 3.283246803  | 1 | 4.473550515 | 12.204356578 | 8.412980716  |
| 6              | 2.967755962 | 8.885927220  | 1.134973103  | 6 | 6.115713426 | 9.739836099  | 10.936996435 |
| 1              | 2.256126500 | 9.259361149  | 1.864903606  | 1 | 6.589873545 | 9.053388747  | 11.627053622 |
| 1              | 3.164819242 | 9.676689166  | 0.417281529  | 6 | 6.812351250 | 9.591183912  | 3.414792091  |
| 1              | 2.496519151 | 8.063079352  | 0.601119118  | 1 | 7.115109006 | 10.393192039 | 4.080011846  |
|                |             |              |              | 1 | 7.466180804 | 9.629558788  | 2.545398803  |
|                |             |              |              | 1 | 6.987781393 | 8.645287517  | 3.913399315  |
|                |             |              |              | 6 | 4.517921805 | 11.497765354 | 10.448571285 |
|                |             |              |              | 1 | 3.741450561 | 12.169359864 | 10.793350953 |
|                |             |              |              | 6 | 2.613507773 | 8.252690916  | 10.270981781 |
| <b>SNP-Min</b> |             |              |              |   |             |              |              |
| 16             | 6.408775067 | 10.574682214 | 7.039905087  |   |             |              |              |
| 14             | 5.062316388 | 9.804519286  | 2.812277649  |   |             |              |              |

|               |             |              |              |   |             |              |              |
|---------------|-------------|--------------|--------------|---|-------------|--------------|--------------|
| 1             | 3.141137607 | 7.329747373  | 10.054916647 | 8 | 8.465346191 | 6.743648591  | 3.691904431  |
| 1             | 1.978989670 | 8.103233587  | 11.131670849 | 8 | 6.820684786 | 5.261043532  | 3.760186695  |
| 1             | 3.332314340 | 9.035753439  | 10.474763124 | 8 | 5.738968541 | 11.930667851 | 6.291701004  |
| 6             | 4.458014824 | 8.264088336  | 1.885953091  | 7 | 5.952258512 | 9.547339090  | 5.607918536  |
| 6             | 6.507351264 | 3.309570355  | 5.808524446  | 6 | 4.647022496 | 9.183736163  | 6.088318343  |
| 1             | 7.249793718 | 3.342598878  | 5.024399155  | 6 | 2.216454293 | 8.411342489  | 7.184323432  |
| 1             | 5.759487971 | 2.565444540  | 5.585030615  | 1 | 1.285406231 | 8.098792361  | 7.626308569  |
| 1             | 6.988114139 | 3.087028694  | 6.750203139  | 6 | 4.602855426 | 8.507106584  | 7.328134705  |
| 6             | 4.698580738 | 10.610582392 | 12.846022464 | 1 | 5.529897807 | 8.324167522  | 7.829736792  |
| 1             | 4.857880452 | 9.639579130  | 13.304410879 | 6 | 7.348617040 | 6.448956554  | 3.998850614  |
| 1             | 3.651775052 | 10.883168737 | 12.938240066 | 6 | 2.250982923 | 9.063087402  | 5.971616662  |
| 1             | 5.291315043 | 11.346598464 | 13.387400106 | 1 | 1.319858178 | 9.249235395  | 5.473344211  |
| 8             | 2.749380398 | 10.936057463 | 3.563344999  | 6 | 3.479974975 | 9.514104907  | 5.359069390  |
| 6             | 5.012804204 | 11.323503740 | 1.723944095  | 6 | 3.445626858 | 10.276718539 | 4.128734598  |
| 1             | 5.379031490 | 12.189853047 | 2.268112655  | 6 | 6.387325609 | 7.334030110  | 4.686678526  |
| 1             | 5.654078932 | 11.186327186 | 0.856784994  | 1 | 5.415487992 | 6.941128703  | 4.903999615  |
| 1             | 4.016079165 | 11.554344033 | 1.366070417  | 6 | 3.413792555 | 8.154115143  | 7.893412373  |
| 6             | 5.512172380 | 7.870069835  | 0.815535448  | 6 | 7.945591261 | 9.504375718  | 8.280841664  |
| 1             | 6.455638793 | 7.587545806  | 1.272505847  | 1 | 8.592137431 | 9.119870343  | 7.496803709  |
| 1             | 5.155325697 | 7.018532570  | 0.239932007  | 6 | 6.948847124 | 10.412184581 | 7.991581367  |
| 1             | 5.697295515 | 8.683115012  | 0.118756683  | 6 | 6.765103024 | 8.583991699  | 4.994764086  |
| 6             | 4.269583505 | 7.072634382  | 2.860203946  | 1 | 7.746306231 | 8.927012647  | 4.742958960  |
| 1             | 3.477809116 | 7.272290101  | 3.575918911  | 6 | 7.329948090 | 9.596020169  | 10.635873731 |
| 1             | 4.000645250 | 6.174881740  | 2.307330251  | 6 | 6.105245665 | 10.933252453 | 9.011107379  |
| 1             | 5.183512546 | 6.859417227  | 3.407008095  | 1 | 5.333743601 | 11.646671546 | 8.746155792  |
| 6             | 3.108378789 | 8.545467913  | 1.174816277  | 6 | 8.132817981 | 9.088344609  | 9.620646702  |
| 1             | 2.340931017 | 8.841551686  | 1.882920313  | 1 | 8.919952947 | 8.379853373  | 9.846290051  |
| 1             | 3.209473626 | 9.329429085  | 0.430573885  | 6 | 6.038679348 | 11.018822901 | 2.550606288  |
| 1             | 2.762722835 | 7.647975467  | 0.665634927  | 1 | 6.251661866 | 11.635002658 | 3.417318785  |
|               |             |              |              | 1 | 6.463445216 | 11.504448386 | 1.677741127  |
|               |             |              |              | 1 | 6.517818178 | 10.057210577 | 2.680236659  |
|               |             |              |              | 6 | 6.301177987 | 10.535304229 | 10.304067372 |
|               |             |              |              | 1 | 5.685196724 | 10.945216357 | 11.095291660 |
|               |             |              |              | 6 | 4.403849574 | 7.511678828  | 9.946545856  |
|               |             |              |              | 1 | 5.121440536 | 6.789756175  | 9.570382378  |
|               |             |              |              | 1 | 4.043127605 | 7.179414678  | 10.908957079 |
| <b>SNP-TS</b> |             |              |              |   |             |              |              |
| 16            | 6.683296825 | 10.860375803 | 6.336231005  |   |             |              |              |
| 14            | 4.213198283 | 10.843678673 | 2.380169430  |   |             |              |              |
| 8             | 3.277151432 | 7.584026513  | 9.106437126  |   |             |              |              |
| 8             | 7.948239740 | 11.014174714 | 5.679943000  |   |             |              |              |

|   |             |              |              |   |             |              |              |
|---|-------------|--------------|--------------|---|-------------|--------------|--------------|
| 1 | 4.883327221 | 8.476315030  | 10.042881092 | 8 | 5.746481429 | 11.910742899 | 6.395369473  |
| 6 | 3.707660779 | 9.522076168  | 1.106190010  | 7 | 5.943034476 | 9.517111745  | 5.716018441  |
| 6 | 7.641272432 | 4.304360473  | 3.108885238  | 6 | 4.675820359 | 9.138221681  | 6.260207496  |
| 1 | 7.943135243 | 4.664784971  | 2.136366227  | 6 | 2.229528173 | 8.359233664  | 7.390633554  |
| 1 | 7.035078144 | 3.418241422  | 3.008467463  | 1 | 1.323143104 | 8.040073636  | 7.870234621  |
| 1 | 8.518755151 | 4.093024585  | 3.702598473  | 6 | 4.652887357 | 8.498124647  | 7.511602574  |
| 6 | 7.562717815 | 9.202039875  | 12.092406856 | 1 | 5.582681438 | 8.340224665  | 8.011092609  |
| 1 | 8.264588355 | 9.894145560  | 12.554368275 | 6 | 7.255606571 | 6.464284491  | 3.965960306  |
| 1 | 7.978765700 | 8.201390092  | 12.157410936 | 6 | 2.215993168 | 8.950893676  | 6.167110454  |
| 1 | 6.633483730 | 9.236888049  | 12.652782332 | 1 | 1.286670096 | 9.112803710  | 5.653916422  |
| 8 | 2.203734698 | 10.548594199 | 3.646918469  | 6 | 3.446328266 | 9.409733743  | 5.534064443  |
| 6 | 3.496974799 | 12.537553404 | 1.977434116  | 6 | 3.435234266 | 10.116243792 | 4.364250336  |
| 1 | 3.634249516 | 13.216889195 | 2.814819404  | 6 | 6.335356487 | 7.330204582  | 4.728761362  |
| 1 | 4.033636229 | 12.963612740 | 1.128686975  | 1 | 5.385725423 | 6.923582508  | 5.012578383  |
| 1 | 2.440729962 | 12.532414563 | 1.726361843  | 6 | 3.472205267 | 8.151983617  | 8.089705646  |
| 6 | 4.613581013 | 9.716899281  | -0.142001587 | 6 | 7.989194619 | 9.463414753  | 8.321005635  |
| 1 | 5.661832543 | 9.573939825  | 0.101081078  | 1 | 8.595913639 | 9.054600722  | 7.517548568  |
| 1 | 4.350183762 | 8.991699803  | -0.909052096 | 6 | 7.009748546 | 10.398071794 | 8.058462598  |
| 1 | 4.492393025 | 10.707908672 | -0.573124266 | 6 | 6.723374540 | 8.578569643  | 5.032022387  |
| 6 | 3.952418607 | 8.105619329  | 1.686695288  | 1 | 7.682943605 | 8.935857686  | 4.723613362  |
| 1 | 3.304665876 | 7.912063966  | 2.536184674  | 6 | 7.450553564 | 9.577216755  | 10.693021804 |
| 1 | 3.748730251 | 7.348890095  | 0.931923845  | 6 | 6.214967498 | 10.946813837 | 9.102356693  |
| 1 | 4.983262175 | 7.983653128  | 2.007724158  | 1 | 5.454420409 | 11.678811919 | 8.860706685  |
| 6 | 2.226437560 | 9.626239524  | 0.648344378  | 6 | 8.204860648 | 9.045260690  | 9.655882763  |
| 1 | 1.540917666 | 9.472294612  | 1.473636880  | 1 | 8.976356679 | 8.311990625  | 9.858431758  |
| 1 | 2.013890830 | 10.591924555 | 0.200011379  | 6 | 5.205932399 | 11.146393883 | 2.376352184  |
| 1 | 2.020816268 | 8.863852168  | -0.101819693 | 1 | 5.396402421 | 11.773182903 | 3.241173248  |

**S<sub>ΣP</sub>(σ<sup>1</sup>π<sup>1</sup>)-Min/CI(S<sub>ΣP</sub>/S<sub>0</sub>)**

|    |             |              |             |   |             |              |              |
|----|-------------|--------------|-------------|---|-------------|--------------|--------------|
| 16 | 6.680145522 | 10.837583821 | 6.409711500 | 1 | 5.741550450 | 10.212909764 | 2.508417193  |
| 14 | 3.390487260 | 10.926068819 | 2.056720156 | 6 | 6.440625505 | 10.546729801 | 10.392242801 |
| 8  | 3.349930259 | 7.622091609  | 9.319314708 | 1 | 5.861565469 | 10.976127822 | 11.199963872 |
| 8  | 7.929892636 | 10.997298828 | 5.707516415 | 6 | 4.480284343 | 7.608978596  | 10.156817769 |
| 8  | 8.336496664 | 6.781177524  | 3.565706272 | 1 | 5.199886401 | 6.869766505  | 9.820464772  |
| 8  | 6.730375503 | 5.268206407  | 3.761559291 | 1 | 4.125768316 | 7.336841576  | 11.139521882 |
|    |             |              |             | 1 | 4.952874383 | 8.580518656  | 10.188664767 |
|    |             |              |             | 6 | 3.031386235 | 9.589934736  | 0.797257062  |

|                                           |              |              |              |   |              |              |              |
|-------------------------------------------|--------------|--------------|--------------|---|--------------|--------------|--------------|
| 6                                         | 7.511305600  | 4.330240331  | 3.039149234  | 6 | -2.672285220 | -0.200396921 | 1.772462331  |
| 1                                         | 7.726975598  | 4.701289363  | 2.047832158  | 1 | -3.698223204 | -0.296084355 | 2.077872921  |
| 1                                         | 6.914273540  | 3.434018265  | 2.981706228  | 6 | -0.346063828 | -0.485078649 | 2.298085456  |
| 1                                         | 8.437816645  | 4.130511316  | 3.557691274  | 1 | 0.446504718  | -0.757781381 | 2.958828361  |
| 6                                         | 7.709410617  | 9.175548680  | 12.143596923 | 6 | 2.349238761  | -2.823268909 | -1.288996079 |
| 1                                         | 8.400720631  | 9.878969762  | 12.604496971 | 6 | -2.333602637 | 0.302609237  | 0.532290917  |
| 1                                         | 8.147497623  | 8.183609631  | 12.194621940 | 1 | -3.106812319 | 0.601319862  | -0.148221949 |
| 1                                         | 6.786278528  | 9.184837699  | 12.715322986 | 6 | -0.987860368 | 0.450528026  | 0.132834475  |
| 8                                         | 2.467149189  | 10.385231784 | 3.544100272  | 6 | -0.549100624 | 0.995292805  | -1.204011795 |
| 6                                         | 2.615918202  | 12.562306992 | 1.674627131  | 6 | 1.504725281  | -1.901373793 | -0.509972089 |
| 1                                         | 2.788606217  | 13.252884996 | 2.498329191  | 1 | 0.472590638  | -2.159300076 | -0.388137113 |
| 1                                         | 3.052983234  | 12.992595989 | 0.777903060  | 6 | -1.661586732 | -0.592342650 | 2.668566359  |
| 1                                         | 1.540549121  | 12.485786957 | 1.535854117  | 6 | 2.751526079  | 0.022555746  | 3.666542299  |
| 6                                         | 3.808250293  | 9.907229785  | -0.506626038 | 1 | 3.389267576  | -0.589812532 | 3.035085047  |
| 1                                         | 4.882732378  | 9.881763765  | -0.348761029 | 6 | 2.101302117  | 1.125099090  | 3.147679132  |
| 1                                         | 3.562785272  | 9.162705707  | -1.259825099 | 6 | 2.056862118  | -0.785774747 | -0.007507956 |
| 1                                         | 3.543918272  | 10.883247849 | -0.907559070 | 1 | 3.092894915  | -0.577647588 | -0.168534916 |
| 6                                         | 3.481274269  | 8.208489640  | 1.342240105  | 6 | 1.780111889  | 0.461970040  | 5.846489897  |
| 1                                         | 2.926907225  | 7.940618635  | 2.236636171  | 6 | 1.268086878  | 1.937823532  | 3.966494600  |
| 1                                         | 3.302384254  | 7.438367565  | 0.594481045  | 1 | 0.767655829  | 2.796193756  | 3.535648634  |
| 1                                         | 4.541434352  | 8.198228629  | 1.578257122  | 6 | 2.573990367  | -0.311702677 | 5.023742853  |
| 6                                         | 1.509878118  | 9.539854724  | 0.495216040  | 1 | 3.087849479  | -1.178187676 | 5.420965824  |
| 1                                         | 0.940207073  | 9.317722731  | 1.394311110  | 6 | 0.143837467  | 2.735783601  | -3.753876537 |
| 1                                         | 1.155220087  | 10.481885797 | 0.087226006  | 1 | 0.335911208  | 3.436276433  | -2.946901024 |
| 1                                         | 1.298265100  | 8.762620666  | -0.235827021 | 1 | 0.158849723  | 3.290110306  | -4.689628514 |
|                                           |              |              |              | 1 | 0.956932344  | 2.018987548  | -3.769108327 |
|                                           |              |              |              | 6 | 1.117535395  | 1.605656131  | 5.300046335  |
|                                           |              |              |              | 1 | 0.497285901  | 2.216417822  | 5.944522681  |
|                                           |              |              |              | 6 | -1.105904725 | -1.411821251 | 4.819989964  |
|                                           |              |              |              | 1 | -0.564840848 | -2.294805007 | 4.496014994  |
|                                           |              |              |              | 1 | -1.649964343 | -1.639710698 | 5.724123003  |
|                                           |              |              |              | 1 | -0.401179517 | -0.613307901 | 5.007667274  |
|                                           |              |              |              | 6 | -1.790711500 | 0.434995065  | -4.636317357 |
|                                           |              |              |              | 6 | 2.356257461  | -4.857225463 | -2.446581218 |
|                                           |              |              |              | 1 | 2.751383318  | -4.429019832 | -3.356525876 |
|                                           |              |              |              | 1 | 1.631321487  | -5.621811926 | -2.677611458 |
| <b>So(<math>\sigma^2\pi^0</math>)-Min</b> |              |              |              |   |              |              |              |
| 16                                        | 2.209656514  | 1.437090814  | 1.447866520  |   |              |              |              |
| 14                                        | -1.506409785 | 1.920144366  | -3.517064675 |   |              |              |              |
| 8                                         | -2.070970285 | -1.039955524 | 3.866962530  |   |              |              |              |
| 8                                         | 3.569048503  | 1.307317079  | 1.009293528  |   |              |              |              |
| 8                                         | 3.517789711  | -2.688218112 | -1.504577466 |   |              |              |              |
| 8                                         | 1.658381262  | -3.876470803 | -1.698384670 |   |              |              |              |
| 8                                         | 1.499452115  | 2.644179892  | 1.164220407  |   |              |              |              |
| 7                                         | 1.383250723  | 0.176410936  | 0.740556143  |   |              |              |              |
| 6                                         | -0.015530336 | 0.048477319  | 1.041866049  |   |              |              |              |

|   |              |              |              |   |              |              |              |
|---|--------------|--------------|--------------|---|--------------|--------------|--------------|
| 1 | 3.166329318  | -5.273055665 | -1.864934933 | 6 | -0.165540413 | -1.179878418 | 2.298964933  |
| 6 | 1.642787689  | 0.142251295  | 7.333440765  | 1 | 0.530775285  | -1.384163739 | 3.080890629  |
| 1 | 2.430187629  | 0.648029046  | 7.890629800  | 6 | 2.975467488  | -0.916540308 | -2.199334075 |
| 1 | 1.735904618  | -0.925395449 | 7.507749370  | 6 | -1.901895509 | -0.641674151 | 0.163487866  |
| 1 | 0.685097219  | 0.483814328  | 7.714000489  | 1 | -2.567140543 | -0.439964490 | -0.654193284 |
| 8 | -1.602097504 | 1.320106119  | -1.892009424 | 6 | -0.598629731 | -0.132780372 | 0.141634365  |
| 6 | -2.887157759 | 3.162511436  | -3.576606837 | 6 | 0.001359478  | 0.813363022  | -0.840101718 |
| 1 | -2.663833334 | 4.005679737  | -2.928016032 | 6 | 2.195307084  | -0.939648690 | -0.960136317 |
| 1 | -3.022478393 | 3.549611515  | -4.583853417 | 1 | 1.743485802  | -1.868279772 | -0.674732770 |
| 1 | -3.829185514 | 2.733374204  | -3.251284539 | 6 | -1.469041616 | -1.636971248 | 2.326223668  |
| 6 | -1.591965681 | 0.880575771  | -6.110908020 | 6 | 2.518610629  | -0.420740422 | 3.949138068  |
| 1 | -0.574716386 | 1.217672241  | -6.289205775 | 1 | 3.264270745  | -0.762778979 | 3.242499604  |
| 1 | -1.786760864 | 0.046727028  | -6.781895564 | 6 | 1.727558006  | 0.735227884  | 3.643938831  |
| 1 | -2.272263903 | 1.684615679  | -6.381835977 | 6 | 2.027027989  | 0.203181013  | -0.238093683 |
| 6 | -0.783002768 | -0.697452587 | -4.309322822 | 1 | 2.590773128  | 1.072026946  | -0.490540780 |
| 1 | -0.916032541 | -1.062072915 | -3.295728454 | 6 | 1.302949896  | -0.608776848 | 6.057524620  |
| 1 | -0.934256051 | -1.535431241 | -4.986976671 | 6 | 0.779420762  | 1.203742534  | 4.511391441  |
| 1 | 0.244437560  | -0.362870836 | -4.420011557 | 1 | 0.180573640  | 2.071471284  | 4.250133019  |
| 6 | -3.233297323 | -0.106314720 | -4.456660109 | 6 | 2.290234863  | -1.085495851 | 5.120878857  |
| 1 | -3.417423023 | -0.399897300 | -3.426813172 | 1 | 2.872153584  | -1.964733471 | 5.365448780  |
| 1 | -3.974212455 | 0.635381922  | -4.740003167 | 6 | -0.588910449 | 3.728071071  | -2.036920365 |
| 1 | -3.384516056 | -0.982001561 | -5.084516405 | 1 | -1.390312525 | 3.835678238  | -1.311909549 |

### CYC-S<sub>0</sub>-TS

|    |              |              |              |   |              |              |              |
|----|--------------|--------------|--------------|---|--------------|--------------|--------------|
| 16 | 1.888893735  | 1.452479675  | 2.086304831  | 1 | 0.350255187  | 3.716510215  | -1.495674975 |
| 14 | -0.819098880 | 2.186614099  | -3.044070503 | 6 | 0.571773340  | 0.522137302  | 5.747675624  |
| 8  | -1.992991848 | -2.329825941 | 3.353210158  | 1 | -0.167723925 | 0.906615748  | 6.441439274  |
| 8  | 3.241708077  | 1.810251497  | 1.803358365  | 6 | -1.195818253 | -2.583493115 | 4.480734477  |
| 8  | 3.584978272  | 0.019643372  | -2.625499411 | 1 | -0.388291321 | -3.265739487 | 4.238055559  |
| 8  | 2.958475495  | -2.096462013 | -2.805304056 | 1 | -1.843313862 | -3.046084874 | 5.209370189  |
| 8  | 0.883272707  | 2.464533365  | 1.932118218  | 1 | -0.778702970 | -1.672399152 | 4.885373099  |
| 7  | 1.555962107  | 0.131081856  | 1.109545877  | 6 | 0.422237025  | 1.997305722  | -4.442983914 |
| 6  | 0.233657151  | -0.414346929 | 1.213481401  | 6 | 3.706100288  | -2.219364329 | -3.999742061 |
| 6  | -2.338731703 | -1.375998762 | 1.255230120  | 1 | 3.331732896  | -1.540677044 | -4.751313600 |
| 1  | -3.342147570 | -1.755076524 | 1.306243421  | 1 | 3.579467341  | -3.239957696 | -4.323646475 |
|    |              |              |              | 1 | 4.750396420  | -2.012622731 | -3.819037545 |
|    |              |              |              | 6 | 1.126023912  | -1.335348027 | 7.391365354  |



|               |              |              |              |   |              |              |              |
|---------------|--------------|--------------|--------------|---|--------------|--------------|--------------|
| 1             | 0.164009498  | -1.095752084 | 7.832042947  | 6 | 2.756149887  | -1.341004783 | -2.513603268 |
| 1             | 1.908538313  | -1.030492586 | 8.084153730  | 6 | -1.540163552 | -1.217988303 | -0.176035534 |
| 1             | 1.196502558  | -2.410610172 | 7.254696174  | 1 | -2.063946283 | -1.284261509 | -1.111731342 |
| 8             | -0.678132178 | 0.846829498  | -1.944226656 | 6 | -0.229261741 | -0.736028508 | -0.132895262 |
| 6             | -2.577578411 | 1.998546796  | -3.610680882 | 6 | 0.696080637  | -0.348605607 | -1.233624004 |
| 1             | -3.248509396 | 1.979580263  | -2.756821429 | 6 | 1.953539139  | -1.278260576 | -1.263147570 |
| 1             | -2.874778461 | 2.829396612  | -4.244503843 | 1 | 1.870001070  | -2.216458341 | -0.742968197 |
| 1             | -2.724428468 | 1.079629720  | -4.169121803 | 6 | -1.465795886 | -1.540715526 | 2.223918640  |
| 6             | -0.085948291 | 2.809268530  | -5.667107700 | 6 | 2.537516777  | -0.425048581 | 3.992979229  |
| 1             | -0.223218346 | 3.859517128  | -5.421266714 | 1 | 3.300820790  | -0.929332867 | 3.410459288  |
| 1             | 0.641880007  | 2.754109083  | -6.473274154 | 6 | 1.873456518  | 0.731983371  | 3.456977916  |
| 1             | -1.026040840 | 2.418292169  | -6.043171163 | 6 | 1.994434406  | -0.005707131 | -0.480017639 |
| 6             | 1.810027100  | 2.548023194  | -4.022805738 | 1 | 2.682401634  | 0.756011585  | -0.783708336 |
| 1             | 2.199349533  | 2.025864804  | -3.154870741 | 6 | 1.149317120  | -0.185307165 | 6.000378663  |
| 1             | 2.521865720  | 2.416255197  | -4.834274808 | 6 | 0.907357739  | 1.391049430  | 4.170504098  |
| 1             | 1.759074538  | 3.608365859  | -3.795411072 | 1 | 0.405177707  | 2.252942297  | 3.741625036  |
| 6             | 0.553621391  | 0.505533382  | -4.846312209 | 6 | 2.159180820  | -0.880159817 | 5.237374582  |
| 1             | 0.902909184  | -0.096060276 | -4.013765258 | 1 | 2.634587834  | -1.754095313 | 5.666738175  |
| 1             | -0.397594357 | 0.100947461  | -5.182116878 | 6 | -0.466547687 | 2.787143269  | -1.284720851 |
| 1             | 1.265850581  | 0.401081217  | -5.662197887 | 1 | -1.136057890 | 2.407390488  | -0.518884115 |
|               |              |              |              | 1 | -0.804180267 | 3.785416798  | -1.553342536 |
|               |              |              |              | 1 | 0.519218608  | 2.878601878  | -0.843644729 |
|               |              |              |              | 6 | 0.549945355  | 0.926898434  | 5.465829788  |
|               |              |              |              | 1 | -0.195971952 | 1.473094547  | 6.029188977  |
|               |              |              |              | 6 | -1.519765398 | -1.952703240 | 4.559521180  |
|               |              |              |              | 1 | -0.765249887 | -2.733429191 | 4.580843298  |
|               |              |              |              | 1 | -2.283871141 | -2.177140577 | 5.288776103  |
|               |              |              |              | 1 | -1.052085319 | -1.007458505 | 4.797849553  |
|               |              |              |              | 6 | 0.512081726  | 2.406325408  | -4.217346593 |
|               |              |              |              | 6 | 3.388546297  | -2.734574267 | -4.283204353 |
|               |              |              |              | 1 | 3.033489313  | -2.057595590 | -5.046160760 |
|               |              |              |              | 1 | 3.198957175  | -3.756297687 | -4.571635365 |
|               |              |              |              | 1 | 4.446409882  | -2.578817918 | -4.128134082 |
|               |              |              |              | 6 | 0.808260784  | -0.685026410 | 7.401478513  |
|               |              |              |              | 1 | -0.089256256 | -0.202828750 | 7.775040714  |
|               |              |              |              | 1 | 1.630927568  | -0.463068810 | 8.079376742  |
| <b>exo-P3</b> |              |              |              |   |              |              |              |
| 16            | 2.177631770  | 1.213158904  | 1.833723218  |   |              |              |              |
| 14            | -0.474193954 | 1.689006686  | -2.783596268 |   |              |              |              |
| 8             | -2.166771751 | -1.919146655 | 3.313630065  |   |              |              |              |
| 8             | 3.579824827  | 1.399375309  | 1.587199572  |   |              |              |              |
| 8             | 3.390194631  | -0.442885399 | -2.973719764 |   |              |              |              |
| 8             | 2.674007454  | -2.535915878 | -3.073777831 |   |              |              |              |
| 8             | 1.301518466  | 2.299094613  | 1.498187947  |   |              |              |              |
| 7             | 1.754783805  | -0.149468817 | 0.954386340  |   |              |              |              |
| 6             | 0.418714138  | -0.652583516 | 1.086729707  |   |              |              |              |
| 6             | -2.164750263 | -1.589037240 | 1.003334696  |   |              |              |              |
| 1             | -3.181337340 | -1.936234730 | 1.007947370  |   |              |              |              |
| 6             | -0.160872661 | -1.111451540 | 2.271953323  |   |              |              |              |
| 1             | 0.415662830  | -1.161567943 | 3.165102590  |   |              |              |              |

|                           |              |              |              |   |             |              |              |
|---------------------------|--------------|--------------|--------------|---|-------------|--------------|--------------|
| 1                         | 0.659351042  | -1.761653049 | 7.395978351  | 1 | 1.305711217 | 9.995800139  | 5.055124498  |
| 8                         | 0.211712390  | 0.185403713  | -2.374102741 | 6 | 3.396492554 | 9.678646275  | 5.492151118  |
| 6                         | -2.222485998 | 1.283558989  | -3.279883437 | 6 | 3.806024642 | 10.249396271 | 4.205078852  |
| 1                         | -2.756581690 | 0.817729702  | -2.456616572 | 6 | 5.744479605 | 6.757245800  | 6.309200208  |
| 1                         | -2.765163982 | 2.184907915  | -3.552776419 | 1 | 4.687641036 | 6.617464212  | 6.214353124  |
| 1                         | -2.256710648 | 0.603729253  | -4.125246844 | 6 | 2.392675360 | 8.822091140  | 8.024090843  |
| 6                         | -0.290238017 | 3.578899910  | -4.845965122 | 6 | 6.464797211 | 9.712906480  | 9.564860254  |
| 1                         | -0.510124088 | 4.352148904  | -4.113893875 | 1 | 7.221980955 | 8.991569467  | 9.270324802  |
| 1                         | 0.288307622  | 4.038760226  | -5.644092352 | 6 | 5.982220739 | 10.634917560 | 8.659764219  |
| 1                         | -1.227732340 | 3.236294091  | -5.273054168 | 6 | 6.331977743 | 7.959776280  | 6.409798920  |
| 6                         | 1.877294074  | 2.946621062  | -3.717447727 | 1 | 7.396212670 | 8.026745249  | 6.480714227  |
| 1                         | 2.463194695  | 2.164110265  | -3.244328959 | 6 | 5.029809585 | 10.639299677 | 11.290617544 |
| 1                         | 2.455695047  | 3.330127684  | -4.555342924 | 6 | 4.996201474 | 11.594501125 | 9.040648752  |
| 1                         | 1.743892104  | 3.758394954  | -3.008586062 | 1 | 4.631366972 | 12.305359899 | 8.309568739  |
| 6                         | 0.754582674  | 1.325556586  | -5.302141771 | 6 | 5.970120519 | 9.714398284  | 10.887474917 |
| 1                         | 1.333189989  | 0.497996161  | -4.906596023 | 1 | 6.360731171 | 8.991263603  | 11.592560473 |
| 1                         | -0.183429273 | 0.935971056  | -5.688878792 | 6 | 6.808936469 | 9.558749104  | 3.345224952  |
| 1                         | 1.304938290  | 1.753112261  | -6.137787473 | 1 | 7.148240000 | 10.331100180 | 4.027839542  |
|                           |              |              |              | 1 | 7.449802186 | 9.598245994  | 2.466322249  |
|                           |              |              |              | 1 | 6.956585917 | 8.594234560  | 3.814745827  |
|                           |              |              |              | 6 | 4.538093365 | 11.594334963 | 10.341262129 |
|                           |              |              |              | 1 | 3.799297254 | 12.320527389 | 10.657194282 |
|                           |              |              |              | 6 | 2.687780245 | 8.094091679  | 10.259622304 |
|                           |              |              |              | 1 | 3.183566409 | 7.155280809  | 10.033985358 |
|                           |              |              |              | 1 | 2.050485257 | 7.958349036  | 11.120458112 |
|                           |              |              |              | 1 | 3.434825863 | 8.846004818  | 10.473721227 |
|                           |              |              |              | 6 | 4.376490486 | 8.369315973  | 1.818302405  |
|                           |              |              |              | 6 | 6.565236217 | 3.217363277  | 6.131332040  |
|                           |              |              |              | 1 | 7.264377578 | 3.194776542  | 5.308153595  |
|                           |              |              |              | 1 | 5.808780832 | 2.459995665  | 6.001085008  |
|                           |              |              |              | 1 | 7.096617013 | 3.061042704  | 7.058886675  |
|                           |              |              |              | 6 | 4.549858473 | 10.697703065 | 12.739045843 |
|                           |              |              |              | 1 | 4.645413183 | 9.727349156  | 13.216173059 |
|                           |              |              |              | 1 | 3.513956007 | 11.019661912 | 12.787451856 |
|                           |              |              |              | 1 | 5.154305237 | 11.413460168 | 13.294531721 |
|                           |              |              |              | 8 | 2.859583692 | 11.072192226 | 3.716423996  |
| <b>T<sub>NP</sub>-Min</b> |              |              |              |   |             |              |              |
| 16                        | 6.478453582  | 10.530273923 | 7.006833943  |   |             |              |              |
| 14                        | 5.058400598  | 9.854681532  | 2.780650439  |   |             |              |              |
| 8                         | 1.842766492  | 8.480035040  | 9.204737356  |   |             |              |              |
| 8                         | 7.873593680  | 10.207793255 | 6.929620421  |   |             |              |              |
| 8                         | 7.786030297  | 5.540733082  | 6.412171539  |   |             |              |              |
| 8                         | 5.871657726  | 4.454504929  | 6.159446539  |   |             |              |              |
| 8                         | 5.982411825  | 11.667882822 | 6.300862862  |   |             |              |              |
| 7                         | 5.670018545  | 9.197783808  | 6.382557774  |   |             |              |              |
| 6                         | 4.237339957  | 9.220137631  | 6.509389125  |   |             |              |              |
| 6                         | 1.509543223  | 9.252019925  | 7.018352280  |   |             |              |              |
| 1                         | 0.454104741  | 9.257214435  | 7.220142593  |   |             |              |              |
| 6                         | 3.730158479  | 8.800212571  | 7.757337989  |   |             |              |              |
| 1                         | 4.438154442  | 8.521983238  | 8.507598296  |   |             |              |              |
| 6                         | 6.595989406  | 5.550857565  | 6.302895537  |   |             |              |              |
| 6                         | 2.001336026  | 9.666125095  | 5.802065520  |   |             |              |              |

|   |             |              |             |   |             |              |              |
|---|-------------|--------------|-------------|---|-------------|--------------|--------------|
| 6 | 5.038393962 | 11.416917495 | 1.754001802 | 6 | 3.374195851 | 10.310758236 | 4.077413173  |
| 1 | 5.439863484 | 12.247044672 | 2.328284189 | 6 | 6.431691353 | 7.371189571  | 4.726453975  |
| 1 | 5.657351947 | 11.300304557 | 0.868073223 | 1 | 5.455628733 | 6.980038894  | 4.928416123  |
| 1 | 4.041184667 | 11.691688707 | 1.427750619 | 6 | 3.437473655 | 8.197440948  | 7.876758424  |
| 6 | 5.369708234 | 7.999833728  | 0.682620850 | 6 | 7.947545195 | 9.469902996  | 8.316275002  |
| 1 | 6.328550315 | 7.681753909  | 1.081031701 | 1 | 8.585766454 | 9.079812472  | 7.528417340  |
| 1 | 4.969252541 | 7.179082990  | 0.091144293 | 6 | 6.977187370 | 10.410241495 | 8.038184897  |
| 1 | 5.538604466 | 8.836858836  | 0.010257307 | 6 | 6.810105316 | 8.622378429  | 5.031500973  |
| 6 | 4.205737497 | 7.140279851  | 2.748559056 | 1 | 7.796619345 | 8.958083660  | 4.791120736  |
| 1 | 3.468828280 | 7.331497415  | 3.522597303 | 6 | 7.328049772 | 9.538237082  | 10.672035375 |
| 1 | 3.869373419 | 6.279731967  | 2.173772936 | 6 | 6.149329305 | 10.940516257 | 9.066521445  |
| 1 | 5.143403710 | 6.868345505  | 3.224969036 | 1 | 5.401097705 | 11.683162868 | 8.814765263  |
| 6 | 3.002660409 | 8.714241377  | 1.187420665 | 6 | 8.118038484 | 9.024943829  | 9.649163588  |
| 1 | 2.277312947 | 8.996279197  | 1.944599705 | 1 | 8.882839629 | 8.289022533  | 9.864010768  |
| 1 | 3.087599575 | 9.529268798  | 0.474906338 | 6 | 5.997923386 | 10.983168473 | 2.520824992  |
| 1 | 2.609033802 | 7.850057304  | 0.655843983 | 1 | 6.224116232 | 11.625491014 | 3.365415800  |

### T<sub>NP-TS</sub>

|    |             |              |             |   |             |              |              |
|----|-------------|--------------|-------------|---|-------------|--------------|--------------|
| 16 | 6.724666209 | 10.890200973 | 6.386606827 | 1 | 6.426120122 | 11.439614437 | 1.631554976  |
| 14 | 4.159161745 | 10.826868088 | 2.342445369 | 1 | 6.477194299 | 10.024330731 | 2.673817194  |
| 8  | 3.306364017 | 7.603650575  | 9.079470412 | 6 | 6.330946006 | 10.515708955 | 10.353704145 |
| 8  | 7.994883539 | 11.052069732 | 5.742949859 | 1 | 5.726779367 | 10.931496484 | 11.151422919 |
| 8  | 8.519444246 | 6.775605870  | 3.755450501 | 6 | 4.431064731 | 7.516742684  | 9.921581390  |
| 8  | 6.868097639 | 5.299382800  | 3.798179532 | 1 | 5.140214390 | 6.784707348  | 9.548692725  |
| 8  | 5.778561530 | 11.958932108 | 6.356480608 | 1 | 4.066972808 | 7.189262032  | 10.885101504 |
| 7  | 5.993175766 | 9.598398291  | 5.617401604 | 1 | 4.921703594 | 8.474720619  | 10.021044117 |
| 6  | 4.675010580 | 9.243013117  | 6.069422588 | 6 | 3.659223730 | 9.507094313  | 1.062907486  |
| 6  | 2.253428114 | 8.475752885  | 7.176010163 | 6 | 7.689297701 | 4.346100376  | 3.142537980  |
| 1  | 1.314114917 | 8.177393333  | 7.604996643 | 1 | 7.997266742 | 4.715001309  | 2.175018524  |
| 6  | 4.625426037 | 8.556193648  | 7.304597801 | 1 | 7.081062853 | 3.462821361  | 3.030201995  |
| 1  | 5.551035898 | 8.360296358  | 7.803051124 | 1 | 8.563129945 | 4.126649592  | 3.738609160  |
| 6  | 7.398176341 | 6.483760013  | 4.048256470 | 6 | 7.541369588 | 9.108993158  | 12.121993368 |
| 6  | 2.300036300 | 9.127776939  | 5.963813044 | 1 | 8.242932094 | 9.784694401  | 12.608033939 |
| 1  | 1.369788792 | 9.324300458  | 5.470264135 | 1 | 7.948884754 | 8.103784195  | 12.168709558 |
| 6  | 3.513608031 | 9.563298070  | 5.339825488 | 1 | 6.606195383 | 9.137972015  | 12.673017858 |
|    |             |              |             | 8 | 2.079748542 | 10.572661603 | 3.803616103  |
|    |             |              |             | 6 | 3.476369558 | 12.522938322 | 1.907688909  |
|    |             |              |             | 1 | 3.630976179 | 13.226059360 | 2.721544076  |

|   |             |              |              |   |              |              |              |
|---|-------------|--------------|--------------|---|--------------|--------------|--------------|
| 1 | 4.011127436 | 12.914681730 | 1.042735265  | 1 | 0.499201115  | -1.819412487 | -0.599739818 |
| 1 | 2.419129206 | 12.526907786 | 1.662461801  | 6 | -1.649879675 | -0.705022277 | 2.614159582  |
| 6 | 4.589665826 | 9.656067552  | -0.173712375 | 6 | 2.870124316  | 0.264241648  | 3.702710066  |
| 1 | 5.630754863 | 9.497685436  | 0.089271768  | 1 | 3.634597419  | -0.160444256 | 3.058478428  |
| 1 | 4.324369056 | 8.918793995  | -0.928918404 | 6 | 2.020124639  | 1.242744749  | 3.222141208  |
| 1 | 4.495428100 | 10.638958199 | -0.629085009 | 6 | 2.040218065  | -0.455802505 | -0.057405846 |
| 6 | 3.857156283 | 8.096081227  | 1.673252767  | 1 | 3.072671480  | -0.208358758 | -0.177135866 |
| 1 | 3.181029703 | 7.933624605  | 2.506673708  | 6 | 1.767445540  | 0.356386976  | 5.857727664  |
| 1 | 3.658808823 | 7.329682760  | 0.926859503  | 6 | 1.015382009  | 1.813747771  | 4.049155643  |
| 1 | 4.875615325 | 7.958956108  | 2.026538971  | 1 | 0.359753326  | 2.580082546  | 3.654232980  |
| 6 | 2.189187255 | 9.635698831  | 0.574861597  | 6 | 2.732016235  | -0.177519366 | 5.027104780  |
| 1 | 1.480197831 | 9.521644624  | 1.388659184  | 1 | 3.398638987  | -0.944480729 | 5.399392802  |
| 1 | 2.007564775 | 10.590489849 | 0.090626636  | 6 | 0.498234022  | 2.042481626  | -3.789866533 |
| 1 | 1.982218201 | 8.855312834  | -0.156149157 | 1 | 0.874114300  | 2.845415215  | -3.163648003 |

**$T_{\Sigma P}(\sigma^1 \pi^1)$ -Min**

|    |              |              |              |   |              |              |              |
|----|--------------|--------------|--------------|---|--------------|--------------|--------------|
| 16 | 2.097738494  | 1.668349596  | 1.549110748  | 1 | 1.034795040  | 1.137077028  | -3.527020399 |
| 14 | -1.338925339 | 1.853032636  | -3.579829452 | 6 | 0.901343565  | 1.372266289  | 5.358064958  |
| 8  | -2.015131296 | -1.295967624 | 3.772431010  | 1 | 0.150908021  | 1.803972682  | 6.008257953  |
| 8  | 3.453865613  | 1.632146945  | 1.086619945  | 6 | -1.011041882 | -1.673955086 | 4.678665094  |
| 8  | 3.574358585  | -2.169159330 | -1.699539473 | 1 | -0.380166074 | -2.449862418 | 4.260007424  |
| 8  | 1.752945062  | -3.377524439 | -2.044540877 | 1 | -1.518809403 | -2.061685246 | 5.548049698  |
| 8  | 1.327697071  | 2.853988050  | 1.345732172  | 1 | -0.397270003 | -0.827571081 | 4.958556001  |
| 7  | 1.325386847  | 0.409728445  | 0.762286860  | 6 | -2.006527133 | 0.263625501  | -4.335537025 |
| 6  | -0.058482712 | 0.202333541  | 1.059947004  | 6 | 2.491947139  | -4.270188466 | -2.860707056 |
| 6  | -2.690185932 | -0.282429941 | 1.768348607  | 1 | 2.906445889  | -3.750624134 | -3.711318939 |
| 1  | -3.704600906 | -0.474008261 | 2.065146748  | 1 | 1.788920346  | -5.019689589 | -3.186054712 |
| 6  | -0.348419350 | -0.477154490 | 2.236865469  | 1 | 3.290903664  | -4.725971990 | -2.295628190 |
| 1  | 0.473802861  | -0.785143618 | 2.846407798  | 6 | 1.651145044  | -0.103103911 | 7.309377594  |
| 6  | 2.412367241  | -2.361627446 | -1.508622725 | 1 | 2.320213368  | 0.484536835  | 7.935663578  |
| 6  | -2.410381281 | 0.375272777  | 0.587689557  | 1 | 1.929512105  | -1.147919705 | 7.403999672  |
| 1  | -3.211744764 | 0.698078551  | -0.048136016 | 1 | 0.638766883  | 0.030582735  | 7.676849071  |
| 6  | -1.073628855 | 0.660258904  | 0.195371320  | 8 | -1.658229055 | 1.781936747  | -1.883763271 |
| 6  | -0.777751128 | 1.359001599  | -0.997017992 | 6 | -2.255886460 | 3.369644535  | -4.130868913 |
| 6  | 1.526866539  | -1.530545078 | -0.678380081 | 1 | -1.815024311 | 4.261079997  | -3.693743830 |
|    |              |              |              | 1 | -2.216973966 | 3.478179942  | -5.212143691 |
|    |              |              |              | 1 | -3.298041186 | 3.332634624  | -3.833574309 |

|   |              |              |              |   |              |              |              |
|---|--------------|--------------|--------------|---|--------------|--------------|--------------|
| 6 | -1.526374383 | 0.167029031  | -5.809259367 | 6 | 2.662463553  | -0.576145508 | 3.755834757  |
| 1 | -0.443872035 | 0.112032560  | -5.870430987 | 1 | 3.369057905  | -1.125243381 | 3.143306736  |
| 1 | -1.929902082 | -0.728532760 | -6.275506593 | 6 | 1.986973907  | 0.570845936  | 3.214071827  |
| 1 | -1.859855038 | 1.019543379  | -6.395576858 | 6 | 2.081515058  | -0.528280839 | -0.578653263 |
| 6 | -1.488337742 | -0.968827174 | -3.549369697 | 1 | 2.501201623  | 0.337088299  | -1.046276615 |
| 1 | -1.841398336 | -0.955206972 | -2.523841726 | 6 | 1.446982481  | -0.202864078 | 5.849546636  |
| 1 | -1.847261244 | -1.884677785 | -4.013535203 | 6 | 1.091031220  | 1.286422844  | 3.963158365  |
| 1 | -0.402884929 | -1.009432273 | -3.538321545 | 1 | 0.576745627  | 2.139881916  | 3.531924956  |
| 6 | -3.557218576 | 0.267041705  | -4.301227278 | 6 | 2.376874990  | -0.959367226 | 5.047189258  |
| 1 | -3.926191297 | 0.356362242  | -3.283528923 | 1 | 2.867011648  | -1.822437814 | 5.481629328  |
| 1 | -3.966136443 | 1.083610048  | -4.887520543 | 6 | -1.327818041 | 3.044747728  | -1.465737904 |
| 1 | -3.942768303 | -0.662059906 | -4.714616476 | 1 | -2.167568010 | 2.635656402  | -0.911959565 |

### CYC-T<sub>1</sub>-TS

|    |              |              |              |
|----|--------------|--------------|--------------|
| 16 | 2.224699240  | 0.968142255  | 1.557066478  |
| 14 | -0.963383978 | 2.004147243  | -2.963572319 |
| 8  | -2.155246091 | -1.826120078 | 3.490325703  |
| 8  | 3.615391010  | 1.013192448  | 1.228970864  |
| 8  | 3.200977992  | -1.004431283 | -3.158247432 |
| 8  | 2.981229090  | -3.180679451 | -2.792985635 |
| 8  | 1.418696550  | 2.108149337  | 1.218632275  |
| 7  | 1.624199275  | -0.390912558 | 0.772758304  |
| 6  | 0.234162986  | -0.694810157 | 0.972133961  |
| 6  | -2.474915172 | -1.129662545 | 1.281085488  |
| 1  | -3.524667116 | -1.302530359 | 1.432201767  |
| 6  | -0.232346553 | -1.212163167 | 2.172566311  |
| 1  | 0.465546045  | -1.438323655 | 2.947555415  |
| 6  | 2.869947311  | -1.907217439 | -2.450834617 |
| 6  | -1.999708414 | -0.650898208 | 0.074271964  |
| 1  | -2.679027579 | -0.452801901 | -0.733327884 |
| 6  | -0.619558755 | -0.407382073 | -0.100838133 |
| 6  | -0.004467796 | 0.082012181  | -1.281922794 |
| 6  | 2.311431216  | -1.763799710 | -1.092789014 |
| 1  | 2.007295604  | -2.653825163 | -0.576521219 |
| 6  | -1.589103970 | -1.401887462 | 2.339083596  |

|   |              |              |              |
|---|--------------|--------------|--------------|
| 6 | 2.662463553  | -0.576145508 | 3.755834757  |
| 1 | 3.369057905  | -1.125243381 | 3.143306736  |
| 6 | 1.986973907  | 0.570845936  | 3.214071827  |
| 6 | 2.081515058  | -0.528280839 | -0.578653263 |
| 1 | 2.501201623  | 0.337088299  | -1.046276615 |
| 6 | 1.446982481  | -0.202864078 | 5.849546636  |
| 6 | 1.091031220  | 1.286422844  | 3.963158365  |
| 1 | 0.576745627  | 2.139881916  | 3.531924956  |
| 6 | 2.376874990  | -0.959367226 | 5.047189258  |
| 1 | 2.867011648  | -1.822437814 | 5.481629328  |
| 6 | -1.327818041 | 3.044747728  | -1.465737904 |
| 1 | -2.167568010 | 2.635656402  | -0.911959565 |
| 1 | -1.589816427 | 4.057600407  | -1.760314654 |
| 1 | -0.480128762 | 3.100355504  | -0.790313923 |
| 6 | 0.825206977  | 0.892684363  | 5.303576847  |
| 1 | 0.133397927  | 1.480518518  | 5.893698963  |
| 6 | -1.335503737 | -2.031676075 | 4.610909318  |
| 1 | -0.686265336 | -2.889774842 | 4.464846476  |
| 1 | -2.000223701 | -2.232138652 | 5.438347762  |
| 1 | -0.727531477 | -1.164544581 | 4.830031494  |
| 6 | 0.486447028  | 2.643422343  | -3.975354954 |
| 6 | 3.525196838  | -3.462217776 | -4.071451912 |
| 1 | 2.916562011  | -3.020249843 | -4.846849816 |
| 1 | 3.523624102  | -4.536866965 | -4.161980556 |
| 1 | 4.533832938  | -3.081952196 | -4.145461367 |
| 6 | 1.213474072  | -0.606496136 | 7.303373708  |
| 1 | 1.974093383  | -0.148299739 | 7.934144310  |
| 1 | 1.282556844  | -1.684329130 | 7.417992495  |
| 1 | 0.238697183  | -0.271618633 | 7.644186505  |
| 8 | -0.593916979 | 0.421899029  | -2.407859889 |
| 6 | -2.489364489 | 1.726921390  | -3.988584904 |
| 1 | -3.315851583 | 1.406854812  | -3.360155016 |
| 1 | -2.796841427 | 2.636691981  | -4.498418660 |
| 1 | -2.327288748 | 0.960162992  | -4.739094532 |
| 6 | 0.169809264  | 4.090034691  | -4.445439419 |
| 1 | 0.061558168  | 4.767277782  | -3.602877846 |

|   |              |             |              |   |              |              |              |
|---|--------------|-------------|--------------|---|--------------|--------------|--------------|
| 1 | 0.980956504  | 4.463361192 | -5.066875853 | 6 | 2.144812203  | 0.313766606  | 3.286659551  |
| 1 | -0.741165835 | 4.130060991 | -5.037504573 | 6 | 1.545557598  | -0.201231884 | -0.663177031 |
| 6 | 1.786518998  | 2.658945704 | -3.129331499 | 1 | 2.242663892  | 0.573934865  | -0.937781494 |
| 1 | 2.092929040  | 1.647261740 | -2.880993992 | 6 | 1.591880706  | -0.567658595 | 5.885644568  |
| 1 | 2.594217130  | 3.117140017 | -3.696623924 | 6 | 1.435731146  | 1.116015424  | 4.140898859  |
| 1 | 1.666645344  | 3.225025875 | -2.209229605 | 1 | 1.072075651  | 2.083179807  | 3.807051834  |
| 6 | 0.709119215  | 1.740580375 | -5.216869731 | 6 | 2.322400055  | -1.412745915 | 4.972087423  |
| 1 | 0.905409552  | 0.713576983 | -4.921792131 | 1 | 2.661954659  | -2.384427397 | 5.310465518  |
| 1 | -0.153626728 | 1.752381689 | -5.876846679 | 6 | -1.327617118 | 3.012868529  | -1.680075397 |
| 1 | 1.566467984  | 2.094072053 | -5.786036000 | 1 | -2.151747997 | 2.606822164  | -1.102382072 |

### STC(T<sub>1</sub>S<sub>0</sub>)

|    |              |              |              |   |              |              |              |
|----|--------------|--------------|--------------|---|--------------|--------------|--------------|
| 16 | 2.349871297  | 0.794591173  | 1.647431135  | 1 | -0.516431650 | 3.232120105  | -0.993677169 |
| 14 | -0.815473391 | 1.836663781  | -3.028876300 | 6 | 1.164873327  | 0.666621170  | 5.463524163  |
| 8  | -2.363176163 | -1.382594898 | 3.688096365  | 1 | 0.630135600  | 1.322176996  | 6.138987594  |
| 8  | 3.711466134  | 0.627406003  | 1.224389205  | 6 | -1.551844377 | -1.725031401 | 4.781554413  |
| 8  | 3.321041372  | -0.627261554 | -2.996413525 | 1 | -1.044985724 | -2.669624718 | 4.606240366  |
| 8  | 2.960598147  | -2.816622300 | -2.885854972 | 1 | -2.215321314 | -1.834059621 | 5.626861283  |
| 8  | 1.750109079  | 2.084053733  | 1.444037912  | 1 | -0.811422539 | -0.966270640 | 4.993685453  |
| 7  | 1.475964477  | -0.364461279 | 0.815736784  | 6 | 0.596679633  | 2.501497084  | -4.079085590 |
| 6  | 0.093551865  | -0.510758388 | 1.161145464  | 6 | 3.747110794  | -3.019229404 | -4.047611186 |
| 6  | -2.635505856 | -0.663886896 | 1.475052424  | 1 | 3.298281289  | -2.524678762 | -4.897068980 |
| 1  | -3.695576064 | -0.729232930 | 1.638406980  | 1 | 3.767251635  | -4.085927365 | -4.205398512 |
| 6  | -0.389524097 | -0.969796765 | 2.354215652  | 1 | 4.748548940  | -2.642616723 | -3.899671404 |
| 1  | 0.281076258  | -1.298804327 | 3.115106230  | 6 | 1.358777291  | -1.052462035 | 7.313952279  |
| 6  | 2.814104136  | -1.568907528 | -2.462975023 | 1 | 2.285365675  | -0.974519841 | 7.880787315  |
| 6  | -2.129226874 | -0.255308242 | 0.247086150  | 1 | 1.050036467  | -2.094380007 | 7.317710707  |
| 1  | -2.795221340 | -0.016372225 | -0.560759299 | 1 | 0.600268344  | -0.453062224 | 7.806711073  |
| 6  | -0.734440304 | -0.167164410 | 0.074312361  | 8 | -0.292917192 | 0.381423230  | -2.286517832 |
| 6  | 0.083521395  | 0.190157955  | -1.020755015 | 6 | -2.279188288 | 1.321614369  | -4.054428037 |
| 6  | 1.964881624  | -1.501413531 | -1.276095151 | 1 | -3.099073133 | 0.995624393  | -3.420267128 |
| 1  | 1.589130127  | -2.418978576 | -0.865997097 | 1 | -2.642409704 | 2.149577407  | -4.658915310 |
| 6  | -1.775985873 | -1.017707071 | 2.525210247  | 1 | -2.030909705 | 0.503574908  | -4.722509043 |
| 6  | 2.615452653  | -0.980657540 | 3.697519859  | 6 | 0.165997680  | 3.852436969  | -4.713927381 |
| 1  | 3.175363490  | -1.596958204 | 3.002672818  | 1 | -0.030960240 | 4.603870298  | -3.954742341 |
|    |              |              |              | 1 | 0.961638857  | 4.230234298  | -5.352365296 |
|    |              |              |              | 1 | -0.723447525 | 3.744162832  | -5.329168864 |

|   |             |             |              |   |              |              |              |
|---|-------------|-------------|--------------|---|--------------|--------------|--------------|
| 6 | 1.861810723 | 2.735760487 | -3.213026215 | 1 | 0.705099000  | -1.518717000 | 1.522371010  |
| 1 | 2.257010003 | 1.794976261 | -2.844273198 | 6 | -5.724905030 | 0.566255000  | -0.069870000 |
| 1 | 2.640394317 | 3.204587251 | -3.811304090 | 6 | -3.762681020 | 1.024702010  | 1.288560010  |
| 1 | 1.658345934 | 3.388081039 | -2.367855598 | 1 | -3.188255020 | 1.716115010  | 1.896810010  |
| 6 | 0.939249373 | 1.494788343 | -5.208194701 | 6 | -5.207166020 | -0.754556000 | -0.332731000 |
| 1 | 1.213976690 | 0.526825823 | -4.799020511 | 1 | -5.779396050 | -1.432765000 | -0.954289000 |
| 1 | 0.101332649 | 1.359549123 | -5.886075953 | 6 | 3.252769020  | 2.854502010  | 1.215091010  |
| 1 | 1.781812184 | 1.860223732 | -5.791470809 | 1 | 4.048123020  | 3.595403020  | 1.189011010  |

**endo-TS**

|    |              |              |              |   |              |              |              |
|----|--------------|--------------|--------------|---|--------------|--------------|--------------|
| 16 | -1.730456010 | -0.683647000 | 1.618768010  | 1 | -5.385782030 | 2.414291010  | 0.944120010  |
| 14 | 3.895114020  | 1.249900000  | 0.540651000  | 6 | -3.907307020 | 2.132827010  | -2.660365020 |
| 8  | -2.564531010 | 2.547797010  | -2.770693010 | 1 | -4.058571020 | 1.195559010  | -3.183013020 |
| 8  | -1.772930010 | -1.961770010 | 2.261068010  | 1 | -4.494593020 | 2.904060020  | -3.132466010 |
| 8  | 2.613174010  | -1.407677010 | -1.696174010 | 1 | -4.204126020 | 2.022043010  | -1.628877010 |
| 8  | 2.046511010  | -3.529312020 | -2.138633010 | 6 | 5.069941030  | 0.353022000  | 1.687941010  |
| 8  | -1.145966010 | 0.407365000  | 2.348571010  | 6 | 3.012488010  | -3.514924020 | -3.149076010 |
| 7  | -0.854057000 | -0.904108010 | 0.211980000  | 1 | 2.800554010  | -2.763164010 | -3.897799020 |
| 6  | -0.775736000 | 0.201580000  | -0.667979000 | 1 | 2.985545010  | -4.494782020 | -3.607938020 |
| 6  | -0.305008000 | 2.415514010  | -2.253402010 | 1 | 4.003269020  | -3.331947020 | -2.754336010 |
| 1  | -0.167915000 | 3.271262010  | -2.885699010 | 6 | -7.086959020 | 0.954792000  | -0.638344000 |
| 6  | -1.848102010 | 0.760842000  | -1.357635010 | 1 | -7.248475020 | 2.024161010  | -0.555091000 |
| 1  | -2.813018010 | 0.315262000  | -1.296490010 | 1 | -7.872241070 | 0.440615000  | -0.087006000 |
| 6  | 1.901863010  | -2.374532010 | -1.408409000 | 1 | -7.163783060 | 0.661561000  | -1.681549010 |
| 6  | 0.752634000  | 1.837030010  | -1.592709010 | 8 | 2.458280010  | 0.158834000  | 0.579380000  |
| 1  | 1.741244010  | 2.225314010  | -1.725349010 | 6 | 4.441405020  | 1.325542010  | -1.226459000 |
| 6  | 0.511750000  | 0.716774000  | -0.775905010 | 1 | 3.974010020  | 2.138286010  | -1.774294010 |
| 6  | 1.354216010  | -0.076311000 | 0.086088000  | 1 | 5.516678030  | 1.483081010  | -1.264546000 |
| 6  | 0.946287000  | -2.482595010 | -0.428129000 | 1 | 4.218366020  | 0.389807000  | -1.728257010 |
| 1  | 0.317996000  | -3.349362010 | -0.393428000 | 6 | 6.269242010  | 1.293520010  | 1.983384010  |
| 6  | -1.611137010 | 1.880533010  | -2.120991010 | 1 | 5.953879010  | 2.192952010  | 2.504362010  |
| 6  | -4.018916020 | -1.166566010 | 0.229761000  | 1 | 6.988535020  | 0.780904010  | 2.617388010  |
| 1  | -3.625458020 | -2.162443010 | 0.057569000  | 1 | 6.786652010  | 1.585133010  | 1.072641010  |
| 6  | -3.287849020 | -0.237912000 | 1.047976000  | 6 | 4.366714020  | -0.006426000 | 3.022556010  |
| 6  | 0.564150000  | -1.344725010 | 0.464840000  | 1 | 3.533958020  | -0.682702000 | 2.859554020  |

|   |             |              |             |   |              |              |             |
|---|-------------|--------------|-------------|---|--------------|--------------|-------------|
| 1 | 5.072845030 | -0.500403000 | 3.685658020 | 6 | 0.451915082  | 0.896189427  | 5.258225769 |
| 1 | 3.999033020 | 0.878782000  | 3.533932020 | 1 | 0.076294343  | 1.839015276  | 4.872187204 |
| 6 | 5.586123020 | -0.943656000 | 1.010209010 | 6 | 1.383701683  | -1.572170668 | 6.214160926 |
| 1 | 4.765534020 | -1.600935010 | 0.737574000 | 1 | 1.734935028  | -2.521905635 | 6.599954478 |
| 1 | 6.156776030 | -0.720367010 | 0.114195000 | 6 | -1.118681022 | 2.732657693  | 0.140714166 |
| 1 | 6.237774010 | -1.480785010 | 1.695101010 | 1 | -1.889380816 | 2.209412616  | 0.698040524 |

**endo-P3**

|    |              |              |              |   |              |              |              |
|----|--------------|--------------|--------------|---|--------------|--------------|--------------|
| 16 | 1.808599094  | 0.706580080  | 2.966732042  | 6 | -0.005228527 | 0.401244686  | 6.510412290  |
| 14 | -0.841887517 | 1.926391510  | -1.511545260 | 1 | -0.699544965 | 0.999378360  | 7.086690547  |
| 8  | -2.933710900 | -1.951538039 | 4.240087382  | 6 | -2.306606628 | -2.118426197 | 5.484231080  |
| 8  | 3.229475494  | 0.632188432  | 2.773335855  | 1 | -1.651422221 | -2.984665213 | 5.472928225  |
| 8  | 0.980080250  | -3.296021882 | 0.907819361  | 1 | -3.097892909 | -2.282587569 | 6.200955097  |
| 8  | 1.925709162  | -3.440929171 | -1.085268252 | 1 | -1.730768328 | -1.249176497 | 5.769420681  |
| 8  | 1.177159955  | 1.967333165  | 2.690852351  | 6 | 0.506500198  | 2.764516206  | -2.525115672 |
| 7  | 1.164293688  | -0.472513932 | 1.969251036  | 6 | 2.093854894  | -4.837457915 | -0.908971809 |
| 6  | -0.217373778 | -0.830192520 | 2.093376084  | 1 | 2.680624848  | -5.040414159 | -0.024653330 |
| 6  | -2.891056012 | -1.467183056 | 1.958655944  | 1 | 2.611775199  | -5.184457889 | -1.789084349 |
| 1  | -3.939346850 | -1.701765642 | 1.947767122  | 1 | 1.133910690  | -5.325467216 | -0.822351293 |
| 6  | -0.848426952 | -1.295706428 | 3.248535760  | 6 | -0.005302768 | -1.342300770 | 8.348715526  |
| 1  | -0.288790614 | -1.474954664 | 4.135816339  | 1 | 0.833083531  | -1.323765998 | 9.042970570  |
| 6  | 1.328395304  | -2.776023033 | -0.104421921 | 1 | -0.341802488 | -2.372116226 | 8.257713126  |
| 6  | -2.224434434 | -1.093549622 | 0.803860438  | 1 | -0.809892682 | -0.739667083 | 8.756984134  |
| 1  | -2.746468309 | -1.037666642 | -0.133720282 | 8 | -0.363140184 | 0.308985346  | -1.284645893 |
| 6  | -0.869057287 | -0.764711000 | 0.877093372  | 6 | -2.443519811 | 1.793096200  | -2.449978319 |
| 6  | 0.079215855  | -0.374224755 | -0.200874878 | 1 | -3.209324493 | 1.338444365  | -1.827633758 |
| 6  | 1.291640526  | -1.322699426 | -0.425726221 | 1 | -2.806126948 | 2.772726523  | -2.751911251 |
| 1  | 1.785236294  | -1.094421838 | -1.351804296 | 1 | -2.337928963 | 1.185130904  | -3.342285558 |
| 6  | -2.191612951 | -1.575126605 | 3.174969708  | 6 | 0.148163460  | 4.263236273  | -2.716353641 |
| 6  | 1.858775977  | -1.092531130 | 5.013493918  | 1 | 0.113030906  | 4.787079696  | -1.765561748 |
| 1  | 2.575377732  | -1.650804090 | 4.420633611  | 1 | 0.898990034  | 4.750770511  | -3.334516257 |
| 6  | 1.360645038  | 0.168258659  | 4.534887022  | 1 | -0.812045947 | 4.384616474  | -3.210823647 |
| 6  | 1.402143287  | -0.192439688 | 0.559576900  | 6 | 1.876987252  | 2.661954728  | -1.806311111 |
| 1  | 2.113979315  | 0.577686409  | 0.346993884  | 1 | 2.191537585  | 1.625528287  | -1.720819489 |
| 6  | 0.439905792  | -0.804834949 | 6.991552257  | 1 | 2.641241730  | 3.187319260  | -2.375891054 |
|    |              |              |              | 1 | 1.845278501  | 3.101728290  | -0.812757690 |



|   |              |             |              |   |             |             |              |
|---|--------------|-------------|--------------|---|-------------|-------------|--------------|
| 6 | 0.623033544  | 2.087186790 | -3.915529413 | 1 | 1.432605894 | 2.537832431 | -4.486042337 |
| 1 | 0.834072241  | 1.026039146 | -3.817892178 |   |             |             |              |
| 1 | -0.290862364 | 2.203323109 | -4.490304383 |   |             |             |              |
